# Supplementary material for: ERK1/2 is an ancestral organising signal in spiral cleavage
Source: Research Square preprint supplement (doi:10.21203/rs.3.rs-793154/v1), 2021-08-23
Supplement: Supplementary file 1 [file 0b75e471affd1bd2efa92d06.xlsx]

## Sheet: Drug_concentrations
Replicate	Drug	Concentration_uM	Radial	Wild type	n
1	BFA	0.1	3	47	50
1	BFA	1	22	2	24
1	BFA	5	21	1	22
1	BFA	10	26	0	26
1	U0126	0.1	2	23	25
1	U0126	1	15	11	26
1	U0126	5	25	2	27
1	U0126	10	34	0	34
2	BFA	0.1	0	74	74
2	BFA	1	68	0	68
2	BFA	5	12	0	12
2	BFA	10	35	0	35
2	U0126	0.1	29	36	65
2	U0126	1	63	0	63
2	U0126	5	65	0	65
2	U0126	10	70	0	70
2	DMSO	0.1	0	69	69
2	DMSO	1	0	80	80
2	DMSO	5	0	74	74
2	DMSO	10	0	62	62
2	DMSO	10	0	34	34
