# Supplementary material for: ERK1/2 is an ancestral organising signal in spiral cleavage
Source: Research Square preprint supplement (doi:10.21203/rs.3.rs-793154/v1), 2021-08-23
Supplement: Supplementary file 2 [file 388166f883f9aef51e8c4739.xlsx]

## Sheet: di-P-ERK1_2_spiralians
Reference	Clade	Species	Type of cleavage	Description of di-P-ERK1/2 immunoreactivity during early development	Axial defects after MAPK inhibition	Concentrations of U0126 used	Phenotype
Vellutini et al (2017)	Cheilostomatida (Bryozoa)	Membranipora membranacea	Non spiral (biradial)	3D	Yes	1,10 or 25 μM	But, presumably maternal, prior to the activation in 3D.
Koop et al (2007)	Gastropoda (Mollusca)	Haliotis asinina	Equal	3D	Yes	10 or 50 μM	Reduced dorsal and ventral tissue and no torsion at lower concentrations. Post trochal protrusion with no evident ventral, dorsal tissue o posterior.
Lambert and Nagy (2001)	Gastropoda (Mollusca)	Tritia obsoleta	Unequal	3D + the micromeres known to require a signal from 3D	Yes	10 μM	Post trochal protrusion with no evident ventral, dorsal tissue o posterior. Lack of eyes and velar lobes.
Lambert and Nagy (2003)	Gastropoda (Mollusca)	Tectura scutum	Equal	3D	Yes	10 or 50 μM	Loss or reduction of larval retractor muscles (derived from 4d) at lower concentration. No shell or operculum at higher concentrations.
Henry and Perry, (2008)	Gastropoda (Mollusca)	Crepidula fornicata	Equal	Initially in the progeny of the first quartet micromeres, just prior to the birth of the third quartet (e.g., late during the 16-cell and subsequently during the 20-cell stages). Afterwards,in 3D just prior to the 24-cell stage, transiently in 4d and finally in a subset of animal micromeres immediately following those stages.	Yes	10 or 25 μM	Gastrulation defects. 1st, 2nd and 3rd quartet micromeres form protrusion with no evident ventral or dorsal tissue. No eyes or shell.
Lartillot et al (2002)	Gastropoda (Mollusca)	Patella vulgata	Equal	3D	No	10 or 50 μM	Changes in the expression of brachyury, but ventral and dorsal tissues are evident
Kozin et al (2013)	Gastropoda (Mollusca)	Testudinalia testudinalis	Equal	3D	Unclear	10 or 40 μM
Lambert and Nagy (2003)	Gastropoda (Mollusca)	Lymnaea palustris	Equal	3D	Not studied
Lambert and Nagy (2003)	Polyplacophora (Mollusca)	Chaetopleura apiculata	Equal	3D	Not studied
Kozin et al (2016)	Errantia (Annelida)	Alitta virens	Unequal	8-cell stage at 1c, 1d and 1D; all micromeres at 16-cell (no vegetal activity); 3d and 3D activity, off in micromeres; then 1q1 and 2d descendant, 3c, 3d, 3D. Fades after that.	No	40 μM	Presumably, disrupts mesoderm bands migration to an antero-ventral position
Pfeifer et al (2014)	Errantia (Annelida)	Platynereis dumerilii	Unequal	Late cleavage in nephroblasts, then later close to the blastopore.	No	10, 25 or 50 μM	Shorter trunk. Reduced musculature.
Amiel et al (2013)	Sedentaria (Annelida)	Capitella teleta	Unequal	The earliest detectable ERK/MAPK activation is during epiboly (gastrulation) in cells positioned around the blastopore lip.	No	5, 10, 20 or 50 μM	Shorter and narrower posterior trunk. Reduced musculature.
Lambert and Nagy (2003)	Sedentaria (Annelida)	Hydroides hexagonus	Equal	4d	Not studied
Current study	Palaeoannelida (Annelida)	Owenia fusiformis	Equal	First in four of the most animal micromeres (1q111) at the 3q stage (4hpf), later in 4d at the coeloblastula stage (5hpf), and at 6hpf, in six additional cells 2a1-2c1 and 2a2-2c2	Yes	10 μM	Antero-ventral radialisation
References
Amiel, A.R., Henry, J.Q., and Seaver, E.C. (2013). An organizing activity is required for head patterning and cell fate specification in the polychaete annelid Capitella teleta: new insights into cell-cell signaling in Lophotrochozoa. Dev Biol 379, 107-122.
Henry, J.J., and Perry, K.J. (2008). MAPK activation and the specification of the D quadrant in the gastropod mollusc, Crepidula fornicata. Dev Biol 313, 181-195.
Koop, D., Richards, G.S., Wanninger, A., Gunter, H.M., and Degnan, B.M. (2007). The role of MAPK signaling in patterning and establishing axial symmetry in the gastropod Haliotis asinina. Dev Biol 311, 200-212.
Kozin, V. V., Babakhanova, R. A., & Kostyuchenko, R. P. (2013). Functional role for MAP kinase signaling in cell lineage and dorsoventral axis specification in the basal gastropod Testudinalia testudinalis (Patellogastropoda, Mollusca). Russian journal of developmental biology, 44 , 35-47.
Kozin, V.V., Filimonova, D.A., Kupriashova, E.E., and Kostyuchenko, R.P. (2016). Mesoderm patterning and morphogenesis in the polychaete Alitta virens (Spiralia, Annelida): Expression of mesodermal markers Twist, Mox, Evx and functional role for MAP kinase signaling. Mech Dev 140, 1-11.
Lambert, J.D., and Nagy, L.M. (2001). MAPK signaling by the D quadrant embryonic organizer of the mollusc Ilyanassa obsoleta. Development 128, 45-56.
Lambert, J.D., and Nagy, L.M. (2003). The MAPK cascade in equally cleaving spiralian embryos. Dev Biol 263, 231-241.
Lartillot, N., Lespinet, O., Vervoort, M., and Adoutte, A. (2002). Expression pattern of Brachyury in the mollusc Patella vulgata suggests a conserved role in the establishment of the AP axis in Bilateria. Development 129, 1411-1421.
Pfeifer, K., Schaub, C., Domsch, K., Dorresteijn, A., and Wolfstetter, G. (2014). Maternal inheritance of twist and analysis of MAPK activation in embryos of the polychaete annelid Platynereis dumerilii. PLoS One 9, e96702.
Vellutini, B. C., Martín-Durán, J. M., & Hejnol, A. (2017). Cleavage modification did not alter blastomere fates during bryozoan evolution. BMC biology, 15 , 1-28.
