# Supplementary material for: ERK1/2 is an ancestral organising signal in spiral cleavage
Source: Research Square preprint supplement (doi:10.21203/rs.3.rs-793154/v1), 2021-08-23
Supplement: Supplementary file 3 [file 39b47d0cf0df378157b27c1f.xlsx]

## Sheet: 5.5-24hpf_radialised
Treatment	Time window	stage	gene	Total n	Wild_type	Radialised_or_no_expression	Notes
control	0.5hpf-5hpf	EG	foxH	5	4	1
control	0.5hpf-5hpf	L	foxH	14	13	1
U0126	0.5hpf-5hpf	EG	foxH	9	0	9
U0126	0.5hpf-5hpf	L	foxH	13	0	13
control	0.5hpf-5hpf	EG	foxH	17	14	3
control	0.5hpf-5hpf	L	foxH	21	21	0
BFA	0.5hpf-5hpf	EG	foxH	22	0	22
BFA	0.5hpf-5hpf	L	foxH	2	0	2
control	0.5hpf-5hpf	EG	lhx1/5	59	NA	NA	Faint ISH
control	0.5hpf-5hpf	L	lhx1/5	43	43	0
U0126	0.5hpf-5hpf	EG	lhx1/5	36	NA	NA	Faint ISH
U0126	0.5hpf-5hpf	L	lhx1/5	116	0	116
BFA	0.5hpf-5hpf	EG	lhx1/5	109	NA	NA	Faint ISH
BFA	0.5hpf-5hpf	L	lhx1/5	14	0	14
control	0.5hpf-5hpf	EG	wnt1	71.8	NA	NA	Faint ISH
control	0.5hpf-5hpf	L	wnt1	57	57	0
U0126	0.5hpf-5hpf	EG	wnt1	75	NA	NA	Faint ISH
U0126	0.5hpf-5hpf	L	wnt1	78	0	78
BFA	0.5hpf-5hpf	EG	wnt1	96.8	NA	NA	Faint ISH
BFA	0.5hpf-5hpf	L	wnt1	19	0	19
control	0.5hpf-5hpf	EG	wntA	73	73	0
control	0.5hpf-5hpf	L	wntA	58	57	1
U0126	0.5hpf-5hpf	EG	wntA	63	0	63
U0126	0.5hpf-5hpf	L	wntA	111	0	111
BFA	0.5hpf-5hpf	EG	wntA	71	0	71
BFA	0.5hpf-5hpf	L	wntA	44	0	44
control	0.5hpf-5hpf	EG	wnt4	22	NA	NA	Faint ISH
control	0.5hpf-5hpf	L	wnt4	29	29	0
U0126	0.5hpf-5hpf	EG	wnt4	118	NA	NA	Faint ISH
U0126	0.5hpf-5hpf	L	wnt4	206	0	206
BFA	0.5hpf-5hpf	EG	wnt4	134	NA	NA	Faint ISH
BFA	0.5hpf-5hpf	L	wnt4	40	0	40
control	0.5hpf-5hpf	EG	delta	71	71	0
control	0.5hpf-5hpf	L	delta	25	25	0
U0126	0.5hpf-5hpf	EG	delta	106	0	106
U0126	0.5hpf-5hpf	L	delta	109	0	109
BFA	0.5hpf-5hpf	EG	delta	66	0	66
BFA	0.5hpf-5hpf	L	delta	33	0	33
control	0.5hpf-5hpf	L	six3/6	74	70	0
U0126	0.5hpf-5hpf	L	six3/6	40	0	40
BFA	0.5hpf-5hpf	L	six3/6	106	0	106
control	0.5hpf-5hpf	L	gata4/5/6	11	11	0
U0126	0.5hpf-5hpf	L	gata4/5/6	9	0	9
BFA	0.5hpf-5hpf	L	gata4/5/6	13	0	13
control	0.5hpf-5hpf	L	twist	17	17	0
U0126	0.5hpf-5hpf	L	twist	61	0	61
BFA	0.5hpf-5hpf	L	twist	17	0	17
control	0.5hpf-5hpf	L	cdx	25	25	0
U0126	0.5hpf-5hpf	L	cdx	27	0	27
BFA	0.5hpf-5hpf	L	cdx	9	0	9
control	0.5hpf-5hpf	L	gsc	23	23	0
U0126	0.5hpf-5hpf	L	gsc	5	0	5
BFA	0.5hpf-5hpf	L	gsc	4	0	4
control	0.5hpf-5hpf	EG	notch-like	2	NA	NA
control	0.5hpf-5hpf	L	notch-like	3	3	0
U0126	0.5hpf-5hpf	EG	notch-like	9	NA	NA
U0126	0.5hpf-5hpf	L	notch-like	4	0	4
control	0.5hpf-5hpf	EG	wntA	4	4	0
control	0.5hpf-5hpf	L	wntA	21	21	0
U0126	0.5hpf-5hpf	EG	wntA	18	0	18
U0126	0.5hpf-5hpf	L	wntA	17	0	17
BFA	0.5hpf-5hpf	EG	wntA	46	0	46
BFA	0.5hpf-5hpf	L	wntA	5	0	5
control	0.5hpf-5hpf	EG	wnt4	30		0
control	0.5hpf-5hpf	L	wnt4	25		0
U0126	0.5hpf-5hpf	EG	wnt4	25	0	25
U0126	0.5hpf-5hpf	L	wnt4	16	0	16
BFA	0.5hpf-5hpf	EG	wnt4	8	0	8
BFA	0.5hpf-5hpf	L	wnt4	4	0	4
control	0.5hpf-5hpf	EG	noggin	11		0
control	0.5hpf-5hpf	L	noggin	41		0
U0126	0.5hpf-5hpf	EG	noggin	14	0	14
U0126	0.5hpf-5hpf	L	noggin	3	0	3
BFA	0.5hpf-5hpf	EG	noggin	11	0	11
BFA	0.5hpf-5hpf	L	noggin	4	0	4
control	0.5hpf-5hpf	EG	BAMBI	13		0
control	0.5hpf-5hpf	L	BAMBI	5		0
U0126	0.5hpf-5hpf	EG	BAMBI	3	0	3
U0126	0.5hpf-5hpf	L	BAMBI	4	0	4
BFA	0.5hpf-5hpf	EG	BAMBI	36	0	36
BFA	0.5hpf-5hpf	L	BAMBI	5	0	5
control	0.5hpf-5hpf	EG	hand2	54	NA	NA	Faint ISH
control	0.5hpf-5hpf	L	hand2	51	51	0
BFA	0.5hpf-5hpf	EG	hand2	22	NA	NA	Faint ISH
BFA	0.5hpf-5hpf	L	hand2	13	0	13
control	0.5hpf-5hpf	EG	notch-like	52	NA	NA	Faint ISH
control	0.5hpf-5hpf	L	notch-like	37	37	0
U0126	0.5hpf-5hpf	EG	notch-like	50	NA	NA	Faint ISH
U0126	0.5hpf-5hpf	L	notch-like	43	0	43
control	0.5hpf-5hpf	EG	foxq2	103	103	0
control	0.5hpf-5hpf	L	foxq2	74	74	0
U0126	0.5hpf-5hpf	EG	foxq2	111	0	111
U0126	0.5hpf-5hpf	L	foxq2	87	0	87
control	0.5hpf-5hpf	L	syt1	108	108	0
BFA	0.5hpf-5hpf	L	syt1	9	0	9
U0126	0.5hpf-5hpf	L	syt1	53	0	53
control	0.5hpf-5hpf	L	elav1	106	106	0
BFA	0.5hpf-5hpf	L	elav1	35	0	35
U0126	0.5hpf-5hpf	L	elav1	88	0	88
control	0.5hpf-5hpf	EG	irx	93	93	0
control	0.5hpf-5hpf	L	irx	62	62	0
U0126	0.5hpf-5hpf	EG	irx	79	0	79
U0126	0.5hpf-5hpf	L	irx	158	0	158
BFA	0.5hpf-5hpf	EG	irx	85	0	85
BFA	0.5hpf-5hpf	L	irx	87	0	87
control	0.5hpf-5hpf	EG	foxQ2	55	55	0
control	0.5hpf-5hpf	L	foxQ2	14	14	0
U0126	0.5hpf-5hpf	EG	foxQ2	40	0	40
U0126	0.5hpf-5hpf	L	foxQ2	38	0	38
control	0.5hpf-5hpf	EG	six3/6	52	52	0
control	0.5hpf-5hpf	L	six3/6	15	15	0
U0126	0.5hpf-5hpf	EG	six3/6	56	0	56
U0126	0.5hpf-5hpf	L	six3/6	78	0	78
control	0.5hpf-5hpf	EG	twist	50	NA	NA	Not expressed
control	0.5hpf-5hpf	L	twist	43	43	0
U0126	0.5hpf-5hpf	EG	twist	43	NA	NA	Not expressed
U0126	0.5hpf-5hpf	L	twist	49	0	49
control	0.5hpf-5hpf	EG	AP2	20	20	0
control	0.5hpf-5hpf	L	AP2	27	27	0
BFA	0.5hpf-5hpf	EG	AP2	112	0	112
BFA	0.5hpf-5hpf	L	AP2	53	0	53
control	0.5hpf-5hpf	EG	hand2	48	NA	NA	Faint ISH
control	0.5hpf-5hpf	L	hand2	53	53	0
BFA	0.5hpf-5hpf	EG	hand2	148	NA	NA	Faint ISH
BFA	0.5hpf-5hpf	L	hand2	63	0	63
control	0.5hpf-5hpf	EG	POU3	45	45	0
control	0.5hpf-5hpf	L	POU3	44	44	0
BFA	0.5hpf-5hpf	EG	POU3	63	0	63
BFA	0.5hpf-5hpf	L	POU3	39	0	39
control	0.5hpf-5hpf	EG	cdx	69	69	0
control	0.5hpf-5hpf	L	cdx	52	52	0
U0126	0.5hpf-5hpf	EG	cdx	96	0	96
U0126	0.5hpf-5hpf	L	cdx	99	0	99
BFA	0.5hpf-5hpf	EG	cdx	64	0	64
BFA	0.5hpf-5hpf	L	cdx	13	0	13
control	0.5hpf-5hpf	EG	fer3	56	56	0
control	0.5hpf-5hpf	L	fer3	25	25	0
U0126	0.5hpf-5hpf	EG	fer3	54	0	54
U0126	0.5hpf-5hpf	L	fer3	32	0	32
BFA	0.5hpf-5hpf	EG	fer3	94	0	94
BFA	0.5hpf-5hpf	L	fer3	16	0	1+
control	0.5hpf-5hpf	EG	foxH	40	40	0
control	0.5hpf-5hpf	L	foxH	24	24	0
U0126	0.5hpf-5hpf	EG	foxH	74	0	74
U0126	0.5hpf-5hpf	L	foxH	74	0	74
BFA	0.5hpf-5hpf	EG	foxH	74	0	74
BFA	0.5hpf-5hpf	L	foxH	22	0	22
control	0.5hpf-5hpf	EG	lhx1/5	32	NA	NA	Faint ISH
control	0.5hpf-5hpf	L	lhx1/5	19	19	0
U0126	0.5hpf-5hpf	EG	lhx1/5	57	NA	NA	Faint ISH
U0126	0.5hpf-5hpf	L	lhx1/5	41	0	41
BFA	0.5hpf-5hpf	EG	lhx1/5	83	NA	NA	Faint ISH
BFA	0.5hpf-5hpf	L	lhx1/5	12	0	12
control	0.5hpf-5hpf	EG	rhox	14	14	0
control	0.5hpf-5hpf	L	rhox	8	8	0
U0126	0.5hpf-5hpf	EG	rhox	40	0	40
U0126	0.5hpf-5hpf	L	rhox	27	0	27
BFA	0.5hpf-5hpf	EG	rhox	54	0	54
BFA	0.5hpf-5hpf	L	rhox	11	0	11
control	0.5hpf-5hpf	EG	wnt1	6	NA	NA	Faint ISH
control	0.5hpf-5hpf	L	wnt1	15	15	15
U0126	0.5hpf-5hpf	EG	wnt1	75	NA	NA	Faint ISH
U0126	0.5hpf-5hpf	L	wnt1	46	0	46
BFA	0.5hpf-5hpf	EG	wnt1	103	NA	NA	Faint ISH
BFA	0.5hpf-5hpf	L	wnt1	31	0	31
control	0.5hpf-5hpf	EG	msx2a2	35	NA	NA	Not expressed
control	0.5hpf-5hpf	L	msx2a2	12	12	0
U0126	0.5hpf-5hpf	EG	msx2a2	79	NA	NA	Not expressed
U0126	0.5hpf-5hpf	L	msx2a2	65	0	65
BFA	0.5hpf-5hpf	EG	msx2a2	48	NA	NA	Not expressed
BFA	0.5hpf-5hpf	L	msx2a2	9	0	9
control	0.5hpf-5hpf	EG	POU4	49	49	0
control	0.5hpf-5hpf	L	POU4	49	49	0
U0126	0.5hpf-5hpf	EG	POU4	48	0	48
U0126	0.5hpf-5hpf	L	POU4	26	0	26
BFA	0.5hpf-5hpf	EG	POU4	44	0	44
BFA	0.5hpf-5hpf	L	POU4	39	0	39

## Sheet: total_N_radialised
treatment	stage	total_n
control	EG	1252
control	L	1330
U0126	EG	1378
U0126	L	1823
BFA	EG	1594
BFA	L	771

## Sheet: 5.5hpf_FISH_phenotype
Treatment	Time window	stage	gene	Wild_type	Radialised	No_expressed	Total n
control	0.5hpf-5hpf	EG	gsc	223	0	38	261
U0126	0.5hpf-5hpf	EG	gsc	11	11	15	67
BFA	0.5hpf-5hpf	EG	gsc	2	0	92	94
control	0.5hpf-5hpf	EG	AP2	27	0	7	34
U0126	0.5hpf-5hpf	EG	AP2	84	0	78	84

## Sheet: BFA_SU5402_compressed
Treatment	Time window	stage	gene	Total n	Wild_type	Radialised_or_no_expression	Compressed	Notes
control	0.5hpf-4hpf	L	syt1	5	5	0	0
BFA	0.5hpf-4hpf	L	syt1	4	0	0	4
control	3hpf-5hpf	L	syt1	4	4	0	0
SU5402	3hpf-5hpf	L	syt1	5	0	0	5
