# Supplementary material for: ERK1/2 is an ancestral organising signal in spiral cleavage
Source: Research Square preprint supplement (doi:10.21203/rs.3.rs-793154/v1), 2021-08-23
Supplement: Supplementary file 4 [file 4bc9ae51364ebdb762e6555c.xlsx]

## Sheet: general_infos
candidate	gene id
AP2	OFUSG17466
BAMBI	OFUSG04738
cdx	OFUSG03177
delta	OFUSG11344
fer3	OFUSG04687
foxh1	OFUSG04867
foxQ2	OFUSG09682
gsc	OFUSG11740
hand2	OFUSG03211
irxA	OFUSG05354
lhx1/5	OFUSG14965
msx2a	OFUSG05673
noggin	OFUSG18439
notch-like	OFUSG01867
POU4	OFUSG03481
POU3	OFUSG01141
rhox	OFUSG21500
six3/6	OFUSG12368
twist	OFUSG04722
wnt1	OFUSG16504
wnt4	OFUSG13755
wntA	OFUSG09779
