# Supplementary material for: ERK1/2 is an ancestral organising signal in spiral cleavage
Source: Research Square preprint supplement (doi:10.21203/rs.3.rs-793154/v1), 2021-08-23
Supplement: Supplementary file 5 [file 4ff20fd008c6931b25671639.xlsx]

## Sheet: diPERK1 2_activation
Replicate	Drug	Treatment	Condition	di-P-ERK1/2 enrichment at 5hpf		n
				yes	no
1	BFA	Treated	BFA_T	1	35	36
	DMS0	Control	BFA_C	45	9	54
	U0126	Treated	U0126_T	7	47	54
	DMS0	Control	U0126_C	51	12	63
2	BFA	Treated	BFA_T	0	120	120
	DMS0	Control	BFA_C	126	1	127
	U0126	Treated	U0126_T	2	135	137
	DMS0	Control	U0126_C	212	3	215
3	BFA	Treated	BFA_T	2	12	14
	DMS0	Control	BFA_C	12	1	13
	U0126	Treated	U0126_T	4	11	15
	DMS0	Control	U0126_C	27	0	27
1	SU5402	Treated	SU5402_T	0	5	5
	DMS0	Control	SU5402_C	5	0	5
2	SU5402	Treated	SU5402_T	2	45	47
	DMS0	Control	SU5402_C	37	5	42
