# Supplementary material for: ERK1/2 is an ancestral organising signal in spiral cleavage
Source: Research Square preprint supplement (doi:10.21203/rs.3.rs-793154/v1), 2021-08-23
Supplement: Supplementary file 6 [file 525015977ce5fc1a13655a2a.xlsx]

## Sheet: GO_10mostoverrepresented
condition	regulation	ontology	category	term	numDEInCat	numInCat	over represented pvalue
BFA CB	down	BP	GO:0045944	positive regulation of transcription by RNA polymerase II	15	742	6.88485906300908e-11
			GO:0006357	regulation of transcription by RNA polymerase II	11	403	1.27520327087123e-09
			GO:0048485	sympathetic nervous system development	3	8	6.04718774143261e-07
			GO:0035136	forelimb morphogenesis	3	9	8.80283333336652e-07
			GO:0000122	negative regulation of transcription by RNA polymerase II	9	519	2.12907207230844e-06
			GO:0009800	cinnamic acid biosynthetic process	2	2	4.75207258184137e-06
			GO:0045893	positive regulation of transcription, DNA-templated	8	447	6.87930836671621e-06
			GO:0030154	cell differentiation	8	467	9.779115087979e-06
			GO:0045892	negative regulation of transcription, DNA-templated	7	340	1.06282837144405e-05
			GO:0055062	phosphate ion homeostasis	2	4	2.79302021067618e-05
BFA CB	down	CC	GO:0005634	nucleus	31	4359	5.23876356595159e-10
			GO:0032444	activin responsive factor complex	2	3	1.39719858924156e-05
			GO:0000790	nuclear chromatin	5	196	7.50872795313841e-05
			GO:0005667	transcription regulator complex	4	122	0.000155310567882925
			GO:0046581	intercellular canaliculus	1	4	0.00909191179308045
			GO:0002116	semaphorin receptor complex	1	4	0.00960562620630384
			GO:0062023	collagen-containing extracellular matrix	5	665	0.0164035312287767
			GO:0034464	BBSome	1	8	0.0173871883529224
			GO:0005576	extracellular region	9	1853	0.0205861459391664
			GO:0098797	plasma membrane protein complex	1	9	0.0231453785423754
BFA CB	down	MF	GO:0000981	DNA-binding transcription factor activity, RNA polymerase II-specific	12	289	0
			GO:0043565	sequence-specific DNA binding	18	418	1.06274745178001e-18
			GO:0000977	RNA polymerase II transcription regulatory region sequence-specific DNA binding	10	230	6.24502893108537e-11
			GO:0003700	DNA-binding transcription factor activity	13	521	6.50721641588203e-11
			GO:0045548	phenylalanine ammonia-lyase activity	2	2	4.75207258184137e-06
			GO:0001228	DNA-binding transcription activator activity, RNA polymerase II-specific	6	220	9.25267447976805e-06
			GO:0046982	protein heterodimerization activity	6	257	2.21897402837395e-05
			GO:0005109	frizzled binding	3	38	8.14090104470697e-05
			GO:0000978	RNA polymerase II cis-regulatory region sequence-specific DNA binding	6	358	0.000139065761236373
			GO:0001227	DNA-binding transcription repressor activity, RNA polymerase II-specific	4	129	0.000188656029600606
BFA CB	up	BP	GO:0031648	protein destabilization	2	35	0.000365682685068668
			GO:0035470	positive regulation of vascular wound healing	1	1	0.000628087285603268
			GO:0051024	positive regulation of immunoglobulin secretion	1	1	0.000628087285603268
			GO:0060096	serotonin secretion, neurotransmission	1	1	0.000628087285603268
			GO:0060691	epithelial cell maturation involved in salivary gland development	1	1	0.000628087285603268
			GO:1900100	positive regulation of plasma cell differentiation	1	1	0.000628087285603268
			GO:1900102	negative regulation of endoplasmic reticulum unfolded protein response	1	1	0.000628087285603268
			GO:1903489	positive regulation of lactation	1	1	0.000628087285603268
			GO:0006990	positive regulation of transcription from RNA polymerase II promoter involved in unfolded protein response	1	2	0.0014824691087773
			GO:0045348	positive regulation of MHC class II biosynthetic process	1	2	0.00151855806444822
BFA CB	up	CC	GO:0031501	mannosyltransferase complex	1	4	0.00312769372097136
			GO:0070083	clathrin-sculpted monoamine transport vesicle membrane	1	5	0.00398196609180944
			GO:1990635	proximal dendrite	1	7	0.00594097810154118
			GO:0071666	Slit-Robo signaling complex	1	7	0.00637056453696108
			GO:0016028	rhabdomere	1	8	0.00674674350303854
			GO:0002081	outer acrosomal membrane	1	9	0.00775764996033278
			GO:0010339	external side of cell wall	1	14	0.0104863147898802
			GO:0002080	acrosomal membrane	1	14	0.0112182340197203
			GO:0009277	fungal-type cell wall	1	18	0.0125892470283282
			GO:0098691	dopaminergic synapse	1	25	0.0192424385572927
BFA CB	up	MF	GO:0004553	hydrolase activity, hydrolyzing O-glycosyl compounds	2	51	0.00076302499815826
			GO:0017076	purine nucleotide binding	1	3	0.0024807129575547
			GO:0004074	biliverdin reductase (NAD(P)+) activity	1	4	0.00251696811276673
			GO:0003938	IMP dehydrogenase activity	1	4	0.00302433829643778
			GO:0042602	riboflavin reductase (NADPH) activity	1	5	0.00318443781549026
			GO:0000009	alpha-1,6-mannosyltransferase activity	1	5	0.00392402333861905
			GO:0004376	glycolipid mannosyltransferase activity	1	6	0.00482967764897102
			GO:0005335	serotonin:sodium symporter activity	1	12	0.0101466853259237
			GO:0015279	store-operated calcium channel activity	1	13	0.0113847169233717
			GO:0044389	ubiquitin-like protein ligase binding	1	15	0.0120184687001242
BFA L	Down	BP	GO:0035794	positive regulation of mitochondrial membrane permeability	3	7	1.13903779115891e-05
			GO:0010940	positive regulation of necrotic cell death	3	9	2.71015473561383e-05
			GO:0010917	negative regulation of mitochondrial membrane potential	3	18	0.00024715348443857
			GO:0061180	mammary gland epithelium development	2	5	0.000463401793538343
			GO:0006508	proteolysis	7	299	0.00422214570864142
			GO:0042694	muscle cell fate specification	2	16	0.00496434556889971
			GO:0042744	hydrogen peroxide catabolic process	3	52	0.00522397213454998
			GO:0007589	body fluid secretion	2	18	0.00621604069482665
			GO:0003100	regulation of systemic arterial blood pressure by endothelin	1	1	0.00657384424175272
			GO:0043114	regulation of vascular permeability	2	19	0.00680730389956201
BFA L	down	CC	GO:0035578	azurophil granule lumen	3	34	0.00158484038385461
			GO:0005576	extracellular region	23	1853	0.00348669901868451
			GO:0071944	cell periphery	3	57	0.00655083981076868
			GO:0031302	intrinsic component of endosome membrane	1	1	0.00657384424175272
			GO:0032444	activin responsive factor complex	1	3	0.0202666686221085
			GO:0042151	nematocyst	1	3	0.0203991902763085
BFA L	Down	MF	GO:0004252	serine-type endopeptidase activity	8	289	0.000807368264015803
			GO:0019806	bromide peroxidase activity	2	12	0.00269688767808203
			GO:0004601	peroxidase activity	3	42	0.00281425443375739
			GO:0018834	dichloromethane dehalogenase activity	1	1	0.00692510008356506
			GO:0031718	type 1 cannabinoid receptor binding	1	1	0.00699768391936855
			GO:0016263	glycoprotein-N-acetylgalactosamine 3-beta-galactosyltransferase activity	2	24	0.0116765429249791
			GO:0000773	phosphatidyl-N-methylethanolamine N-methyltransferase activity	1	2	0.0138289361382935
			GO:0004608	phosphatidylethanolamine N-methyltransferase activity	1	2	0.0138289361382935
			GO:0080101	phosphatidyl-N-dimethylethanolamine N-methyltransferase activity	1	2	0.0138289361382935
			GO:0005152	interleukin-1 receptor antagonist activity	1	3	0.019542797146308
BFA L	Up	BP	GO:0009308	amine metabolic process	2	31	0.000817222012362705
			GO:0016192	vesicle-mediated transport	3	144	0.00100736087406782
			GO:0086069	bundle of His cell to Purkinje myocyte communication	1	1	0.00162198466004649
			GO:0032273	positive regulation of protein polymerization	1	3	0.00324423998064247
			GO:0032298	positive regulation of DNA-dependent DNA replication initiation	1	2	0.00324682968347823
			GO:0061186	negative regulation of silent mating-type cassette heterochromatin assembly	1	2	0.00324682968347823
			GO:0090282	positive regulation of transcription involved in G2/M transition of mitotic cell cycle	1	2	0.00324682968347823
			GO:1903468	positive regulation of DNA replication initiation	1	2	0.00324682968347823
			GO:2000221	negative regulation of pseudohyphal growth	1	2	0.00324682968347823
			GO:0006313	transposition, DNA-mediated	1	3	0.00341299700619182
BFA L	Up	CC	GO:0005789	endoplasmic reticulum membrane	9	958	5.46629838988965e-06
			GO:0097229	sperm end piece	1	1	0.00162470403531284
			GO:0097427	microtubule bundle	1	2	0.00217600781922098
			GO:0000151	ubiquitin ligase complex	2	72	0.00481164236128298
			GO:0071797	LUBAC complex	1	5	0.0075299310729094
			GO:0097224	sperm connecting piece	1	8	0.011533632614831
			GO:0043231	intracellular membrane-bounded organelle	4	703	0.0181438922247402
			GO:0097228	sperm principal piece	1	14	0.020395054041049
			GO:0097225	sperm midpiece	1	18	0.0265341577325419
BFA L	Up	MF	GO:0070330	aromatase activity	7	112	1.33060390119958e-10
			GO:0020037	heme binding	8	387	4.57946889383516e-08
			GO:0005506	iron ion binding	7	372	5.79598456147843e-07
			GO:0101020	estrogen 16-alpha-hydroxylase activity	2	24	0.000415079138819862
			GO:0004497	monooxygenase activity	3	115	0.000562454609940432
			GO:0031013	troponin I binding	1	1	0.00162198466004649
			GO:0051267	CP2 mannose-ethanolamine phosphotransferase activity	1	2	0.00324682968347105
			GO:0017076	purine nucleotide binding	1	3	0.00463008276134568
			GO:0070576	vitamin D 24-hydroxylase activity	1	5	0.00602151705439705
			GO:0016780	phosphotransferase activity, for other substituted phosphate groups	1	6	0.00874583521255429
U0126 CB	down	BP	GO:0045944	positive regulation of transcription by RNA polymerase II	15	742	1.49739268445416e-07
			GO:0021983	pituitary gland development	3	15	1.74547725768625e-05
			GO:0021533	cell differentiation in hindbrain	2	3	3.33814884212961e-05
			GO:0030518	intracellular steroid hormone receptor signaling pathway	2	4	7.09478317234152e-05
			GO:0021797	forebrain anterior/posterior pattern specification	2	5	0.000122517128409568
			GO:0045165	cell fate commitment	4	63	0.000147154505378909
			GO:0021902	commitment of neuronal cell to specific neuron type in forebrain	2	8	0.000337057146838958
			GO:0035136	forelimb morphogenesis	2	9	0.000480191421892388
			GO:0006357	regulation of transcription by RNA polymerase II	7	403	0.000609957048649185
			GO:0000122	negative regulation of transcription by RNA polymerase II	8	519	0.000622209009232534
U0126 CB	down	CC	GO:0032444	activin responsive factor complex	2	3	3.57055218832797e-05
			GO:0019012	virion	3	13	3.7145781270602e-05
			GO:0000790	nuclear chromatin	6	196	8.08315390428626e-05
			GO:1904115	axon cytoplasm	3	45	0.000805225499070824
			GO:0005634	nucleus	28	4359	0.00215046333971336
			GO:0034681	integrin alpha11-beta1 complex	1	1	0.00359578921368618
			GO:0005667	transcription regulator complex	3	122	0.00977482598762328
			GO:0060053	neurofilament cytoskeleton	1	4	0.0277083998117872
			GO:0031673	H zone	1	7	0.0372875845360222
			GO:0031523	Myb complex	1	9	0.0480955539094413
U0126 CB	down	MF	GO:0000981	DNA-binding transcription factor activity, RNA polymerase II-specific	12	289	5.19465413584967e-10
			GO:0043565	sequence-specific DNA binding	13	418	3.11633243578509e-09
			GO:0003700	DNA-binding transcription factor activity	12	521	4.27723863345308e-07
			GO:0001228	DNA-binding transcription activator activity, RNA polymerase II-specific	8	220	1.39905593237696e-06
			GO:0000978	RNA polymerase II cis-regulatory region sequence-specific DNA binding	9	358	5.57181615056376e-06
			GO:0005109	frizzled binding	3	38	0.000332650724710566
			GO:0046332	SMAD binding	3	45	0.000728739689332874
			GO:0000977	RNA polymerase II transcription regulatory region sequence-specific DNA binding	5	230	0.00142050640404618
			GO:0005368	taurine transmembrane transporter activity	1	1	0.00332134395331032
			GO:0038064	collagen receptor activity	1	1	0.00359578921368618
U0126 CB	up	BP	GO:0048675	axon extension	2	47	0.00110004327821891
			GO:0042984	regulation of amyloid precursor protein biosynthetic process	1	3	0.00174885880255478
			GO:0007522	visceral muscle development	1	2	0.00221429334381299
			GO:0010430	fatty acid omega-oxidation	1	4	0.00267474445796699
			GO:1902254	negative regulation of intrinsic apoptotic signaling pathway by p53 class mediator	1	6	0.00378514670955417
			GO:0007525	somatic muscle development	1	8	0.00596648344488172
			GO:0060378	regulation of brood size	1	9	0.0061777330308808
			GO:0098609	cell-cell adhesion	2	138	0.00702582308717326
			GO:1903364	positive regulation of cellular protein catabolic process	1	12	0.00776418874613583
			GO:0045463	R8 cell development	1	5	0.00887030340958809
U0126 CB	up	CC	GO:0005863	striated muscle myosin thick filament	1	4	0.00322256263885548
			GO:0035102	PRC1 complex	1	10	0.00724604009819767
			GO:0002081	outer acrosomal membrane	1	9	0.00730301067699244
			GO:0000324	fungal-type vacuole	1	15	0.00937640650138251
			GO:0002080	acrosomal membrane	1	14	0.0102464392948575
			GO:0048787	presynaptic active zone membrane	1	21	0.0185064201242278
			GO:0005919	pleated septate junction	1	23	0.0194692507856133
			GO:0005918	septate junction	1	33	0.0280928088347257
			GO:0031674	I band	1	46	0.0330730019374031
			GO:0000794	condensed nuclear chromosome	1	54	0.0410786879981206
U0126 CB	up	MF	GO:0005504	fatty acid binding	1	19	0.0122512222381644
			GO:0016705	oxidoreductase activity, acting on paired donors, with incorporation or reduction of molecular oxygen	1	22	0.0145973182060002
			GO:0032934	sterol binding	1	25	0.0168982929614258
			GO:0035612	AP-2 adaptor complex binding	1	18	0.0181395566933974
			GO:0030676	Rac guanyl-nucleotide exchange factor activity	1	16	0.0212753480882145
			GO:0005509	calcium ion binding	4	1440	0.0243477990175795
			GO:0002039	p53 binding	1	43	0.0346842716253108
			GO:0004364	glutathione transferase activity	1	68	0.0364514416108396
U0126 CB	up	BP	GO:0060231	mesenchymal to epithelial transition	3	3	1.47320385814935e-06
			GO:0030182	neuron differentiation	9	114	6.71618572892653e-06
			GO:0051145	smooth muscle cell differentiation	3	5	1.44830916070713e-05
			GO:0061180	mammary gland epithelium development	3	5	1.44830916070811e-05
			GO:0060070	canonical Wnt signaling pathway	6	56	4.24934534241183e-05
			GO:0048644	muscle organ morphogenesis	3	7	4.9835165260724e-05
			GO:0001822	kidney development	8	115	5.44617414470048e-05
			GO:0045165	cell fate commitment	6	63	8.31618387173871e-05
			GO:0001838	embryonic epithelial tube formation	2	2	0.000129825072593577
			GO:0030237	female sex determination	2	2	0.000129825072593577
U0126 L	down	CC	GO:0005861	troponin complex	3	9	0.000117587698853056
			GO:0030428	cell septum	3	13	0.000386992695636614
			GO:0005615	extracellular space	33	1571	0.000596797005809193
			GO:0032982	myosin filament	2	7	0.00262493704985568
			GO:0071944	cell periphery	4	57	0.00409101501159246
			GO:0005576	extracellular region	34	1853	0.00451668090370912
			GO:0015629	actin cytoskeleton	7	182	0.00506933890203479
			GO:0000790	nuclear chromatin	7	196	0.00751269633137833
			GO:0016459	myosin complex	3	36	0.00795969487368524
			GO:0043196	varicosity	2	14	0.0107901788346415
U0126 L	down	MF	GO:0000977	RNA polymerase II transcription regulatory region sequence-specific DNA binding	18	230	1.76895676205626e-10
			GO:0000981	DNA-binding transcription factor activity, RNA polymerase II-specific	16	289	2.63124770558714e-07
			GO:0003700	DNA-binding transcription factor activity	21	521	7.4753950442382e-07
			GO:0005125	cytokine activity	7	49	1.35188175477677e-06
			GO:0000978	RNA polymerase II cis-regulatory region sequence-specific DNA binding	16	358	4.32565852596492e-06
			GO:0001228	DNA-binding transcription activator activity, RNA polymerase II-specific	12	220	9.62181847180956e-06
			GO:0005109	frizzled binding	5	38	6.92867838945214e-05
			GO:0043565	sequence-specific DNA binding	14	418	0.000360154096734763
			GO:0004252	serine-type endopeptidase activity	11	289	0.000533909783205232
			GO:0004100	chitin synthase activity	3	15	0.000605323565369733
U0126 L	down	BP	GO:2000179	positive regulation of neural precursor cell proliferation	2	22	5.48613712082697e-05
			GO:0015908	fatty acid transport	2	23	5.91784613001688e-05
			GO:0015918	sterol transport	2	24	6.41785563527311e-05
			GO:0035912	dorsal aorta morphogenesis	1	2	0.000996228013021694
			GO:1905224	clathrin-coated pit assembly	1	2	0.00102115104233031
			GO:0072554	blood vessel lumenization	1	3	0.00150069390163128
			GO:0003208	cardiac ventricle morphogenesis	1	4	0.00199060690569867
			GO:0021767	mammillary body development	1	4	0.00200172093203223
			GO:0021855	hypothalamus cell migration	1	4	0.00200172093203223
			GO:0061374	mammillothalamic axonal tract development	1	4	0.00200172093203223
U0126 L	down	CC	GO:0000324	fungal-type vacuole	2	15	2.46124987119187e-05
			GO:0070701	mucus layer	1	1	0.000501038031632478
			GO:0042599	lamellar body	1	3	0.00153070377841353
			GO:1901588	dendritic microtubule	1	3	0.00153070377841353
			GO:0071797	LUBAC complex	1	5	0.00251993346244296
			GO:0005635	nuclear envelope	2	164	0.00303140258064171
			GO:0005615	extracellular space	4	1571	0.00665647090921808
			GO:0035371	microtubule plus-end	1	20	0.0100795064960086
			GO:0005881	cytoplasmic microtubule	1	42	0.0209340308359327
			GO:0000151	ubiquitin ligase complex	1	72	0.0356156002526703
U0126 L	up	BP	GO:2000179	positive regulation of neural precursor cell proliferation	2	22	5.48613712082697e-05
			GO:0015908	fatty acid transport	2	23	5.91784613001688e-05
			GO:0015918	sterol transport	2	24	6.41785563527311e-05
			GO:0035912	dorsal aorta morphogenesis	1	2	0.000996228013021694
			GO:1905224	clathrin-coated pit assembly	1	2	0.00102115104233031
			GO:0072554	blood vessel lumenization	1	3	0.00150069390163128
			GO:0003208	cardiac ventricle morphogenesis	1	4	0.00199060690569867
			GO:0021767	mammillary body development	1	4	0.00200172093203223
			GO:0021855	hypothalamus cell migration	1	4	0.00200172093203223
			GO:0061374	mammillothalamic axonal tract development	1	4	0.00200172093203223
U0126 L	up	CC	GO:0000324	fungal-type vacuole	2	15	2.46124987119187e-05
			GO:0070701	mucus layer	1	1	0.000501038031632478
			GO:0042599	lamellar body	1	3	0.00153070377841353
			GO:1901588	dendritic microtubule	1	3	0.00153070377841353
			GO:0071797	LUBAC complex	1	5	0.00251993346244296
			GO:0005635	nuclear envelope	2	164	0.00303140258064171
			GO:0005615	extracellular space	4	1571	0.00665647090921808
			GO:0035371	microtubule plus-end	1	20	0.0100795064960086
			GO:0005881	cytoplasmic microtubule	1	42	0.0209340308359327
			GO:0000151	ubiquitin ligase complex	1	72	0.0356156002526703
U0126 L	up	MF	GO:0005504	fatty acid binding	2	19	4.01389627636503e-05
			GO:0032934	sterol binding	2	25	7.06896613055037e-05
			GO:0015485	cholesterol binding	2	74	0.000626615296203497
			GO:0004301	epoxide hydrolase activity	1	10	0.00500280512572643
			GO:0000287	magnesium ion binding	2	222	0.00544099169767297
			GO:0016688	L-ascorbate peroxidase activity	1	19	0.00945579091731759
			GO:0030332	cyclin binding	1	19	0.00954672703400641
			GO:0051010	microtubule plus-end binding	1	30	0.0151014411116996
			GO:0030276	clathrin binding	1	39	0.0195159821087994
			GO:0043130	ubiquitin binding	1	60	0.0297859989844848

## Sheet: BFA_CB_down_go_BP
category	over_represented_pvalue	under_represented_pvalue	numDEInCat	numInCat	term	ontology
9182	GO:0045944	6.88486e-11	1	15	742	positive regulation of transcription by RNA polymerase II	BP
2346	GO:0006357	1.2752e-09	1	11	403	regulation of transcription by RNA polymerase II	BP
9796	GO:0048485	6.04719e-07	1	3	8	sympathetic nervous system development	BP
7312	GO:0035136	8.80283e-07	1	3	9	forelimb morphogenesis	BP
56	GO:0000122	2.12907e-06	1	9	519	negative regulation of transcription by RNA polymerase II	BP
3710	GO:0009800	4.75207e-06	1	2	2	cinnamic acid biosynthetic process	BP
9157	GO:0045893	6.87931e-06	0.999999	8	447	positive regulation of transcription, DNA-templated	BP
5611	GO:0030154	9.77912e-06	0.999999	8	467	cell differentiation	BP
9156	GO:0045892	1.06283e-05	0.999999	7	340	negative regulation of transcription, DNA-templated	BP
10752	GO:0055062	2.79302e-05	1	2	4	phosphate ion homeostasis	BP
12360	GO:0072210	2.79302e-05	1	2	4	metanephric nephron development	BP
12875	GO:0097275	2.79302e-05	1	2	4	cellular ammonium homeostasis	BP
12876	GO:0097276	2.79302e-05	1	2	4	cellular creatinine homeostasis	BP
12877	GO:0097277	2.79302e-05	1	2	4	cellular urea homeostasis	BP
10760	GO:0055075	4.73001e-05	1	2	5	potassium ion homeostasis	BP
12637	GO:0090263	5.33827e-05	0.999998	4	91	positive regulation of canonical Wnt signaling pathway	BP
12312	GO:0072044	6.89294e-05	1	2	6	collecting duct development	BP
12307	GO:0072017	9.6129e-05	1	2	7	distal tubule development	BP
7313	GO:0035137	0.000101896	1	2	7	hindlimb morphogenesis	BP
5633	GO:0030182	0.000119071	0.999995	4	114	neuron differentiation	BP
5911	GO:0030857	0.00013757	0.999999	2	7	negative regulation of epithelial cell differentiation	BP
3755	GO:0009953	0.000169373	0.999996	3	48	dorsal/ventral pattern formation	BP
2481	GO:0006559	0.000356776	0.999997	2	13	L-phenylalanine catabolic process	BP
2825	GO:0007179	0.000359766	0.999989	3	62	transforming growth factor beta receptor signaling pathway	BP
12607	GO:0090190	0.000361818	0.999997	2	13	positive regulation of branching involved in ureteric bud morphogenesis	BP
9787	GO:0048468	0.000365852	0.999997	2	13	cell development	BP
10735	GO:0055007	0.000417088	0.999996	2	14	cardiac muscle cell differentiation	BP
10763	GO:0055078	0.00042668	0.999996	2	14	sodium ion homeostasis	BP
3229	GO:0008284	0.000442014	0.999958	5	284	positive regulation of cell population proliferation	BP
610	GO:0001947	0.000443582	0.999985	3	66	heart looping	BP
7644	GO:0035909	0.000464733	0.999996	2	14	aorta morphogenesis	BP
5460	GO:0021983	0.000478	0.999996	2	15	pituitary gland development	BP
12789	GO:0097070	0.000545009	0.999995	2	16	ductus arteriosus closure	BP
5792	GO:0030510	0.00055255	0.999995	2	16	regulation of BMP signaling pathway	BP
687	GO:0002088	0.000558762	0.999994	2	16	lens development in camera-type eye	BP
7391	GO:0035265	0.000643601	0.999993	2	16	organ growth	BP
6867	GO:0033504	0.000784156	0.999991	2	19	floor plate development	BP
9055	GO:0045662	0.000908002	0.999988	2	19	negative regulation of myoblast differentiation	BP
8368	GO:0043066	0.00105312	0.999877	5	347	negative regulation of apoptotic process	BP
4087	GO:0010960	0.0012979	0.99998	2	24	magnesium ion homeostasis	BP
476	GO:0001702	0.00138711	0.999977	2	25	gastrulation with mouth forming second	BP
899	GO:0003091	0.00166425	0.99997	2	27	renal water homeostasis	BP
11014	GO:0060412	0.00170214	0.999969	2	28	ventricular septum morphogenesis	BP
10759	GO:0055074	0.00189104	0.999963	2	29	calcium ion homeostasis	BP
3100	GO:0008052	0.00214758	1	1	1	sensory organ boundary specification	BP
913	GO:0003142	0.00214795	1	1	1	cardiogenic plate morphogenesis	BP
915	GO:0003144	0.00214795	1	1	1	embryonic heart tube formation	BP
10949	GO:0060302	0.0021482	1	1	1	negative regulation of cytokine activity	BP
11066	GO:0060513	0.0021482	1	1	1	prostatic bud formation	BP
11164	GO:0060825	0.0021482	1	1	1	fibroblast growth factor receptor signaling pathway involved in neural plate anterior/posterior pattern formation	BP
12609	GO:0090193	0.0021482	1	1	1	positive regulation of glomerulus development	BP
14485	GO:1905006	0.0021482	1	1	1	negative regulation of epithelial to mesenchymal transition involved in endocardial cushion formation	BP
14984	GO:2000313	0.0021482	1	1	1	regulation of fibroblast growth factor receptor signaling pathway involved in neural plate anterior/posterior pattern formation	BP
10833	GO:0060056	0.0021539	1	1	1	mammary gland involution	BP
11061	GO:0060492	0.00216086	1	1	1	lung induction	BP
11104	GO:0060638	0.00216086	1	1	1	mesenchymal-epithelial cell signaling	BP
5307	GO:0021501	0.00216198	1	1	1	prechordal plate formation	BP
7412	GO:0035310	0.00218097	1	1	1	notum cell fate specification	BP
8219	GO:0042693	0.00218097	1	1	1	muscle cell fate commitment	BP
3716	GO:0009821	0.0021944	1	1	1	alkaloid biosynthetic process	BP
8196	GO:0042617	0.0021944	1	1	1	paclitaxel biosynthetic process	BP
8187	GO:0042593	0.00221111	0.999868	3	115	glucose homeostasis	BP
926	GO:0003167	0.00221888	1	1	1	atrioventricular bundle cell differentiation	BP
5311	GO:0021510	0.00243437	0.999946	2	31	spinal cord development	BP
7604	GO:0035810	0.0025279	0.999943	2	34	positive regulation of urine volume	BP
8598	GO:0043588	0.00255128	0.999942	2	33	skin development	BP
921	GO:0003151	0.00258672	0.999941	2	34	outflow tract morphogenesis	BP
9951	GO:0048839	0.00258787	0.999941	2	33	inner ear development	BP
670	GO:0002062	0.00268736	0.999937	2	35	chondrocyte differentiation	BP
8970	GO:0045444	0.00272775	0.999936	2	35	fat cell differentiation	BP
9017	GO:0045595	0.00313746	0.999921	2	35	regulation of cell differentiation	BP
8003	GO:0042127	0.00331242	0.999772	3	134	regulation of cell population proliferation	BP
11165	GO:0060827	0.00427904	0.999995	1	2	regulation of canonical Wnt signaling pathway involved in neural plate anterior/posterior pattern formation	BP
14897	GO:2000053	0.00427904	0.999995	1	2	regulation of Wnt signaling pathway involved in dorsal/ventral axis specification	BP
1005	GO:0003357	0.0042984	0.999995	1	2	noradrenergic neuron differentiation	BP
632	GO:0001987	0.00433259	0.999995	1	2	vasoconstriction of artery involved in baroreceptor response to lowering of systemic arterial blood pressure	BP
9123	GO:0045818	0.00433259	0.999995	1	2	negative regulation of glycogen catabolic process	BP
9124	GO:0045819	0.00433259	0.999995	1	2	positive regulation of glycogen catabolic process	BP
5791	GO:0030509	0.00436328	0.999868	2	44	BMP signaling pathway	BP
2480	GO:0006558	0.004368	0.999995	1	2	L-phenylalanine metabolic process	BP
1000	GO:0003342	0.00437658	0.999995	1	2	proepicardium development	BP
8403	GO:0043154	0.00439197	0.999867	2	45	negative regulation of cysteine-type endopeptidase activity involved in apoptotic process	BP
947	GO:0003205	0.00439686	0.999995	1	2	cardiac chamber development	BP
9443	GO:0046884	0.00439686	0.999995	1	2	follicle-stimulating hormone secretion	BP
4033	GO:0010842	0.00531114	0.999822	2	48	retina layer formation	BP
2850	GO:0007219	0.00541892	0.999555	3	156	Notch signaling pathway	BP
5329	GO:0021533	0.00646735	0.999986	1	3	cell differentiation in hindbrain	BP
9762	GO:0048318	0.00647113	0.999986	1	3	axial mesoderm development	BP
11307	GO:0061303	0.00647936	0.999986	1	3	cornea development in camera-type eye	BP
10737	GO:0055009	0.00649094	0.999986	1	3	atrial cardiac muscle tissue morphogenesis	BP
11188	GO:0060923	0.00649263	0.999986	1	3	cardiac muscle cell fate commitment	BP
5323	GO:0021526	0.00650211	0.999986	1	3	medial motor column neuron differentiation	BP
11051	GO:0060480	0.00651161	0.999986	1	3	lung goblet cell differentiation	BP
10600	GO:0051939	0.00653245	0.999986	1	3	gamma-aminobutyric acid import	BP
11189	GO:0060931	0.00654364	0.999986	1	3	sinoatrial node cell development	BP
9862	GO:0048642	0.00661479	0.999986	1	3	negative regulation of skeletal muscle tissue development	BP
3805	GO:0010159	0.00662313	0.999986	1	3	specification of animal organ position	BP
9835	GO:0048570	0.00665889	0.999985	1	3	notochord morphogenesis	BP
10839	GO:0060070	0.00681353	0.99974	2	56	canonical Wnt signaling pathway	BP
11094	GO:0060596	0.00691165	0.999984	1	3	mammary placode formation	BP
6367	GO:0032092	0.0071081	0.999722	2	56	positive regulation of protein binding	BP
10146	GO:0050796	0.0072468	0.999714	2	58	regulation of insulin secretion	BP
9764	GO:0048332	0.00750999	0.999981	1	3	mesoderm morphogenesis	BP
10127	GO:0050767	0.00816871	0.999657	2	58	regulation of neurogenesis	BP
881	GO:0003007	0.00829623	0.999648	2	60	heart morphogenesis	BP
9095	GO:0045746	0.00863131	0.999626	2	62	negative regulation of Notch signaling pathway	BP
5319	GO:0021521	0.00865347	0.999972	1	4	ventral spinal cord interneuron specification	BP
3867	GO:0010454	0.00865489	0.999972	1	4	negative regulation of cell fate commitment	BP
3868	GO:0010455	0.00865489	0.999972	1	4	positive regulation of cell fate commitment	BP
11233	GO:0061037	0.00865626	0.999972	1	4	negative regulation of cartilage development	BP
5291	GO:0019953	0.00865739	0.999972	1	4	sexual reproduction	BP
5167	GO:0019442	0.00865932	0.999972	1	4	tryptophan catabolic process to acetyl-CoA	BP
7149	GO:0034516	0.00865932	0.999972	1	4	response to vitamin B6	BP
556	GO:0001839	0.00868916	0.999972	1	4	neural plate morphogenesis	BP
5800	GO:0030518	0.00870367	0.999972	1	4	intracellular steroid hormone receptor signaling pathway	BP
9978	GO:0048916	0.00871891	0.999972	1	4	posterior lateral line development	BP
11255	GO:0061072	0.0087696	0.999971	1	4	iris morphogenesis	BP
5913	GO:0030859	0.00893204	0.99997	1	4	polarized epithelial cell differentiation	BP
5382	GO:0021761	0.00901687	0.99997	1	4	limbic system development	BP
8897	GO:0045165	0.00903741	0.999599	2	63	cell fate commitment	BP
6432	GO:0032275	0.00906994	0.999969	1	4	luteinizing hormone secretion	BP
10891	GO:0060174	0.00959866	0.999966	1	4	limb bud formation	BP
13857	GO:1902287	0.00960563	0.999966	1	4	semaphorin-plexin signaling pathway involved in axon guidance	BP
8236	GO:0042733	0.0100596	0.999527	2	68	embryonic digit morphogenesis	BP
3679	GO:0009653	0.010586	0.999489	2	66	anatomical structure morphogenesis	BP
11312	GO:0061312	0.0107229	0.999954	1	5	BMP signaling pathway involved in heart development	BP
639	GO:0001997	0.0107852	0.999954	1	5	positive regulation of the force of heart contraction by epinephrine-norepinephrine	BP
479	GO:0001706	0.0107949	0.999954	1	5	endoderm formation	BP
10931	GO:0060272	0.0108132	0.999954	1	5	embryonic skeletal joint morphogenesis	BP
10821	GO:0060044	0.0108161	0.999954	1	5	negative regulation of cardiac muscle cell proliferation	BP
10836	GO:0060061	0.0108268	0.999954	1	5	Spemann organizer formation	BP
5809	GO:0030540	0.0108349	0.999954	1	5	female genitalia development	BP
5420	GO:0021871	0.0108555	0.999953	1	5	forebrain regionalization	BP
919	GO:0003149	0.0109023	0.999953	1	5	membranous septum morphogenesis	BP
7068	GO:0034344	0.0111832	0.99995	1	5	regulation of type III interferon production	BP
510	GO:0001756	0.0116669	0.999407	2	71	somitogenesis	BP
5444	GO:0021935	0.0118935	0.999944	1	5	cerebellar granule cell precursor tangential migration	BP
5612	GO:0030155	0.0128474	0.999313	2	75	regulation of cell adhesion	BP
12776	GO:0097053	0.0129196	0.999931	1	6	L-kynurenine catabolic process	BP
8525	GO:0043420	0.012953	0.999931	1	6	anthranilate metabolic process	BP
2172	GO:0006006	0.0129809	0.999301	2	78	glucose metabolic process	BP
662	GO:0002043	0.0129988	0.99993	1	6	blood vessel endothelial cell proliferation involved in sprouting angiogenesis	BP
7276	GO:0035051	0.0130703	0.999929	1	6	cardiocyte differentiation	BP
12270	GO:0071908	0.0133157	0.999927	1	6	determination of intestine left/right asymmetry	BP
7915	GO:0039528	0.013336	0.999927	1	6	cytoplasmic pattern recognition receptor signaling pathway in response to virus	BP
7917	GO:0039530	0.0134135	0.999926	1	6	MDA-5 signaling pathway	BP
8560	GO:0043525	0.0134713	0.999261	2	77	positive regulation of neuron apoptotic process	BP
5365	GO:0021688	0.0135934	0.999927	1	5	cerebellar molecular layer formation	BP
9855	GO:0048631	0.0135934	0.999927	1	5	regulation of skeletal muscle tissue growth	BP
11176	GO:0060853	0.0135934	0.999927	1	5	Notch signaling pathway involved in arterial endothelial cell fate commitment	BP
12795	GO:0097102	0.0135934	0.999927	1	5	endothelial tip cell fate specification	BP
13075	GO:0098773	0.0135934	0.999927	1	5	skin epidermis development	BP
9902	GO:0048712	0.0137446	0.999922	1	6	negative regulation of astrocyte differentiation	BP
2941	GO:0007399	0.0148549	0.998232	3	229	nervous system development	BP
11112	GO:0060676	0.0150319	0.999904	1	7	ureteric bud formation	BP
5731	GO:0030334	0.0150352	0.999125	2	82	regulation of cell migration	BP
8461	GO:0043278	0.0151088	0.999903	1	7	response to morphine	BP
11241	GO:0061049	0.0151689	0.999902	1	7	cell growth involved in cardiac muscle cell development	BP
11004	GO:0060394	0.0151884	0.999902	1	7	negative regulation of pathway-restricted SMAD protein phosphorylation	BP
9943	GO:0048813	0.0152017	0.99911	2	83	dendrite morphogenesis	BP
3773	GO:0010002	0.0152134	0.999902	1	7	cardioblast differentiation	BP
3011	GO:0007517	0.0154178	0.99909	2	85	muscle organ development	BP
3654	GO:0009597	0.0154769	0.999898	1	7	detection of virus	BP
12319	GO:0072070	0.0157111	0.999898	1	6	loop of Henle development	BP
5239	GO:0019805	0.0157194	0.999895	1	7	quinolinate biosynthetic process	BP
6611	GO:0032693	0.0157383	0.999898	1	6	negative regulation of interleukin-10 production	BP
9026	GO:0045605	0.0157405	0.999898	1	6	negative regulation of epidermal cell differentiation	BP
15099	GO:2000726	0.0157409	0.999898	1	6	negative regulation of cardiac muscle cell differentiation	BP
14870	GO:1990962	0.0158398	0.999893	1	7	xenobiotic transport across blood-brain barrier	BP
5367	GO:0021693	0.0159259	0.999895	1	6	cerebellar Purkinje cell layer structural organization	BP
8950	GO:0045317	0.0163629	0.999886	1	7	equator specification	BP
946	GO:0003203	0.0170939	0.999873	1	8	endocardial cushion morphogenesis	BP
7067	GO:0034341	0.0172167	0.999871	1	8	response to interferon-gamma	BP
7073	GO:0034354	0.0172189	0.999871	1	8	'de novo' NAD biosynthetic process from tryptophan	BP
3405	GO:0008595	0.0172225	0.999871	1	8	anterior/posterior axis specification, embryo	BP
11405	GO:0061626	0.0172533	0.999871	1	8	pharyngeal arch artery morphogenesis	BP
11338	GO:0061384	0.0173368	0.99987	1	8	heart trabecula morphogenesis	BP
13069	GO:0098739	0.0174943	0.999867	1	8	import across plasma membrane	BP
7309	GO:0035118	0.0175524	0.999866	1	8	embryonic pectoral fin morphogenesis	BP
4399	GO:0015734	0.0176546	0.999865	1	8	taurine transport	BP
2353	GO:0006366	0.0177812	0.998868	2	92	transcription by RNA polymerase II	BP
3733	GO:0009887	0.0178337	0.998863	2	89	animal organ morphogenesis	BP
14869	GO:1990961	0.0180988	0.999858	1	8	xenobiotic detoxification by transmembrane export across the plasma membrane	BP
2873	GO:0007267	0.0182453	0.998822	2	92	cell-cell signaling	BP
3095	GO:0008045	0.0183629	0.998811	2	90	motor neuron axon guidance	BP
3230	GO:0008285	0.0183654	0.997633	3	251	negative regulation of cell population proliferation	BP
3277	GO:0008360	0.0184068	0.998806	2	92	regulation of cell shape	BP
5318	GO:0021520	0.0193373	0.999835	1	9	spinal cord motor neuron cell fate specification	BP
5324	GO:0021527	0.019346	0.999835	1	9	spinal cord association neuron differentiation	BP
2491	GO:0006569	0.0193734	0.999834	1	9	tryptophan catabolic process	BP
14924	GO:2000145	0.0195485	0.999831	1	9	regulation of cell motility	BP
15082	GO:2000648	0.0195722	0.999831	1	9	positive regulation of stem cell proliferation	BP
4165	GO:0014807	0.019949	0.999827	1	8	regulation of somitogenesis	BP
4111	GO:0014002	0.0200722	0.999825	1	8	astrocyte development	BP
6621	GO:0032727	0.0208611	0.999808	1	9	positive regulation of interferon-alpha production	BP
2880	GO:0007276	0.0220017	0.999784	1	10	gamete generation	BP
15202	GO:2001222	0.022003	0.999783	1	10	regulation of neuron migration	BP
9029	GO:0045608	0.0220699	0.999785	1	9	negative regulation of inner ear auditory receptor cell differentiation	BP
2935	GO:0007386	0.0221116	0.999784	1	9	compartment pattern specification	BP
9854	GO:0048630	0.0221849	0.999783	1	9	skeletal muscle tissue growth	BP
638	GO:0001996	0.0235902	0.999748	1	11	positive regulation of heart rate by epinephrine-norepinephrine	BP
10246	GO:0050999	0.0237105	0.999746	1	11	regulation of nitric-oxide synthase activity	BP
9810	GO:0048513	0.023753	0.999745	1	11	animal organ development	BP
12092	GO:0071425	0.0237765	0.999744	1	11	hematopoietic stem cell proliferation	BP
3752	GO:0009948	0.0237918	0.999744	1	11	anterior/posterior axis specification	BP
14731	GO:1990403	0.0242677	0.999734	1	11	embryonic brain development	BP
990	GO:0003323	0.0243606	0.999734	1	10	type B pancreatic cell development	BP
10381	GO:0051302	0.0244553	0.999732	1	10	regulation of cell division	BP
11022	GO:0060425	0.0257568	0.999697	1	12	lung morphogenesis	BP
9857	GO:0048633	0.0263737	0.999685	1	11	positive regulation of skeletal muscle tissue growth	BP
11034	GO:0060444	0.0264595	0.999681	1	12	branching involved in mammary gland duct morphogenesis	BP
511	GO:0001757	0.026556	0.999681	1	11	somite specification	BP
377	GO:0001501	0.0266884	0.997886	2	114	skeletal system development	BP
11245	GO:0061053	0.0267171	0.999674	1	12	somite development	BP
958	GO:0003223	0.0269798	0.999668	1	12	ventricular compact myocardium morphogenesis	BP
540	GO:0001822	0.0275636	0.997778	2	115	kidney development	BP
7890	GO:0038128	0.0283888	0.99963	1	13	ERBB2 signaling pathway	BP
12305	GO:0072014	0.028463	0.99963	1	12	proximal tubule development	BP
5924	GO:0030879	0.0284993	0.999627	1	13	mammary gland development	BP
13625	GO:1900746	0.0285688	0.999627	1	12	regulation of vascular endothelial growth factor signaling pathway	BP
8559	GO:0043524	0.0294094	0.997544	2	121	negative regulation of neuron apoptotic process	BP
2879	GO:0007275	0.0296442	0.993686	4	528	multicellular organism development	BP
3627	GO:0009435	0.0300477	0.999582	1	14	NAD biosynthetic process	BP
12051	GO:0071360	0.030367	0.999573	1	14	cellular response to exogenous dsRNA	BP
11149	GO:0060760	0.03047	0.99957	1	14	positive regulation of response to cytokine stimulus	BP
9042	GO:0045638	0.0307726	0.999564	1	13	negative regulation of myeloid cell differentiation	BP
9174	GO:0045926	0.0312037	0.999549	1	14	negative regulation of growth	BP
3069	GO:0007626	0.031992	0.997204	2	125	locomotory behavior	BP
12688	GO:0090398	0.0324666	0.999509	1	15	cellular senescence	BP
12302	GO:0072006	0.0329814	0.999496	1	14	nephron development	BP
9739	GO:0048263	0.0340248	0.999458	1	16	determination of dorsal identity	BP
8139	GO:0042474	0.0344365	0.999445	1	16	middle ear morphogenesis	BP
5808	GO:0030539	0.034832	0.999432	1	16	male genitalia development	BP
12390	GO:0072384	0.0348466	0.999434	1	15	organelle transport along microtubule	BP
415	GO:0001569	0.0364777	0.999375	1	17	branching involved in blood vessel morphogenesis	BP
767	GO:0002315	0.0369189	0.999362	1	16	marginal zone B cell differentiation	BP
7070	GO:0034351	0.0370149	0.999358	1	16	negative regulation of glial cell apoptotic process	BP
7308	GO:0035116	0.037341	0.999344	1	17	embryonic hindlimb morphogenesis	BP
9838	GO:0048593	0.0377126	0.999334	1	16	camera-type eye morphogenesis	BP
4122	GO:0014029	0.0389716	0.999283	1	18	neural crest formation	BP
6533	GO:0032480	0.0392444	0.999273	1	18	negative regulation of type I interferon production	BP
9822	GO:0048545	0.0393293	0.99927	1	18	response to steroid hormone	BP
15207	GO:2001234	0.0393955	0.999267	1	18	negative regulation of apoptotic signaling pathway	BP
7307	GO:0035115	0.0395587	0.999261	1	18	embryonic forelimb morphogenesis	BP
10819	GO:0060042	0.0418769	0.999171	1	18	retina morphogenesis in camera-type eye	BP
5923	GO:0030878	0.0427733	0.99913	1	20	thyroid gland development	BP
10132	GO:0050772	0.0429386	0.999126	1	19	positive regulation of axonogenesis	BP
6622	GO:0032728	0.043182	0.999113	1	20	positive regulation of interferon-beta production	BP
7275	GO:0035050	0.0434823	0.999101	1	20	embryonic heart tube development	BP
10814	GO:0060037	0.0435759	0.999097	1	20	pharyngeal system development	BP
10964	GO:0060325	0.0436458	0.999094	1	20	face morphogenesis	BP
2345	GO:0006355	0.0442989	0.989299	4	600	regulation of transcription, DNA-templated	BP
11087	GO:0060576	0.0445093	0.999055	1	21	intestinal epithelial cell development	BP
3756	GO:0009954	0.0445531	0.999058	1	19	proximal/distal pattern formation	BP
1011	GO:0003382	0.0458462	0.998999	1	20	epithelial cell morphogenesis	BP
602	GO:0001938	0.0458915	0.998995	1	21	positive regulation of endothelial cell proliferation	BP
3014	GO:0007521	0.0460303	0.998994	1	19	muscle cell fate determination	BP
2730	GO:0006997	0.0474612	0.998924	1	21	nucleus organization	BP
11215	GO:0061003	0.0479069	0.998902	1	22	positive regulation of dendritic spine morphogenesis	BP
581	GO:0001890	0.04932	0.998833	1	23	placenta development	BP
482	GO:0001709	0.0494551	0.998829	1	22	cell fate determination	BP
10824	GO:0060047	0.0494846	0.998825	1	23	heart contraction	BP
9897	GO:0048706	0.0495659	0.998821	1	23	embryonic skeletal system development	BP
3034	GO:0007569	0.0498157	0.998809	1	23	cell aging	BP

## Sheet: BFA_CB_down_go_CC
category	over_represented_pvalue	under_represented_pvalue	numDEInCat	numInCat	term	ontology
1959	GO:0005634	5.23876e-10	1	31	4359	nucleus	CC
6509	GO:0032444	1.3972e-05	1	2	3	activin responsive factor complex	CC
257	GO:0000790	7.50873e-05	0.999995	5	196	nuclear chromatin	CC
1979	GO:0005667	0.000155311	0.999992	4	122	transcription regulator complex	CC
9342	GO:0046581	0.00909191	0.999969	1	4	intercellular canaliculus	CC
699	GO:0002116	0.00960563	0.999966	1	4	semaphorin receptor complex	CC
11512	GO:0062023	0.0164035	0.996334	5	665	collagen-containing extracellular matrix	CC
7125	GO:0034464	0.0173872	0.999869	1	8	BBSome	CC
1936	GO:0005576	0.0205861	0.992615	9	1853	extracellular region	CC
13083	GO:0098797	0.0231454	0.999763	1	9	plasma membrane protein complex	CC
2001	GO:0005700	0.0311482	0.999551	1	14	polytene chromosome	CC
9372	GO:0046658	0.0386687	0.999294	1	18	anchored component of plasma membrane	CC

## Sheet: BFA_CB_down_go_MF
category	over_represented_pvalue	under_represented_pvalue	numDEInCat	numInCat	term	ontology
327	GO:0000981	0	1	12	289	DNA-binding transcription factor activity, RNA polymerase II-specific	MF
8587	GO:0043565	1.06275e-18	1	18	418	sequence-specific DNA binding	MF
324	GO:0000977	6.24503e-11	1	10	230	RNA polymerase II transcription regulatory region sequence-specific DNA binding	MF
1041	GO:0003700	6.50722e-11	1	13	521	DNA-binding transcription factor activity	MF
9004	GO:0045548	4.75207e-06	1	2	2	phenylalanine ammonia-lyase activity	MF
370	GO:0001228	9.25267e-06	0.999999	6	220	DNA-binding transcription activator activity, RNA polymerase II-specific	MF
9489	GO:0046982	2.21897e-05	0.999998	6	257	protein heterodimerization activity	MF
1767	GO:0005109	8.1409e-05	0.999999	3	38	frizzled binding	MF
325	GO:0000978	0.000139066	0.999986	6	358	RNA polymerase II cis-regulatory region sequence-specific DNA binding	MF
369	GO:0001227	0.000188656	0.99999	4	129	DNA-binding transcription repressor activity, RNA polymerase II-specific	MF
8341	GO:0043027	0.00181259	0.999966	2	29	cysteine-type endopeptidase inhibitor activity involved in apoptotic process	MF
1880	GO:0005368	0.00215613	1	1	1	taurine transmembrane transporter activity	MF
4818	GO:0016869	0.0021944	1	1	1	intramolecular transferase activity, transferring amino groups	MF
10705	GO:0052883	0.00219686	1	1	1	tyrosine ammonia-lyase activity	MF
342	GO:0001085	0.00262997	0.999939	2	34	RNA polymerase II transcription factor binding	MF
328	GO:0000987	0.00348567	0.999907	2	40	cis-regulatory region sequence-specific DNA binding	MF
4277	GO:0015185	0.0043424	0.999995	1	2	gamma-aminobutyric acid transmembrane transporter activity	MF
9266	GO:0046332	0.0046188	0.999856	2	45	SMAD binding	MF
1029	GO:0003677	0.00491163	0.998722	8	1193	DNA binding	MF
1776	GO:0005125	0.00508434	0.999833	2	49	cytokine activity	MF
5814	GO:0030550	0.00640822	0.999986	1	3	acetylcholine receptor inhibitor activity	MF
1765	GO:0005102	0.00793819	0.998858	4	353	signaling receptor binding	MF
5765	GO:0030429	0.00865932	0.999972	1	4	kynureninase activity	MF
11508	GO:0061981	0.00865932	0.999972	1	4	3-hydroxykynureninase activity	MF
1881	GO:0005369	0.00870586	0.999972	1	4	taurine:sodium symporter activity	MF
8278	GO:0042803	0.0119955	0.997521	5	618	protein homodimerization activity	MF
5811	GO:0030548	0.015108	0.999903	1	7	acetylcholine receptor regulator activity	MF
1862	GO:0005332	0.0152005	0.999902	1	7	gamma-aminobutyric acid:sodium symporter activity	MF
12716	GO:0090555	0.015978	0.999891	1	7	phosphatidylethanolamine flippase activity	MF
8024	GO:0042165	0.0174533	0.999868	1	8	neurotransmitter binding	MF
4920	GO:0017154	0.0181187	0.999857	1	8	semaphorin receptor activity	MF
13167	GO:0099038	0.0186647	0.999849	1	8	ceramide floppase activity	MF
5962	GO:0030957	0.0200395	0.999825	1	8	Tat protein binding	MF
9490	GO:0046983	0.0230293	0.998315	2	107	protein dimerization activity	MF
1698	GO:0004937	0.0257161	0.999698	1	12	alpha1-adrenergic receptor activity	MF
12715	GO:0090554	0.0263174	0.999687	1	11	phosphatidylcholine floppase activity	MF
13494	GO:0140328	0.0263174	0.999687	1	11	floppase activity	MF
1046	GO:0003714	0.0311352	0.997319	2	123	transcription corepressor activity	MF
5292	GO:0019955	0.045035	0.999032	1	21	cytokine binding	MF
1045	GO:0003713	0.0460205	0.995093	2	152	transcription coactivator activity	MF
4361	GO:0015562	0.0487272	0.998863	1	22	efflux transmembrane transporter activity	MF
1428	GO:0004500	0.0492594	0.998836	1	23	dopamine beta-monooxygenase activity	MF

## Sheet: BFA_CB_up_go_BP
category	over_represented_pvalue	under_represented_pvalue	numDEInCat	numInCat	term	ontology
6249	GO:0031648	0.000365683	0.999997	2	35	protein destabilization	BP
7467	GO:0035470	0.000628087	1	1	1	positive regulation of vascular wound healing	BP
10264	GO:0051024	0.000628087	1	1	1	positive regulation of immunoglobulin secretion	BP
10859	GO:0060096	0.000628087	1	1	1	serotonin secretion, neurotransmission	BP
11118	GO:0060691	0.000628087	1	1	1	epithelial cell maturation involved in salivary gland development	BP
13555	GO:1900100	0.000628087	1	1	1	positive regulation of plasma cell differentiation	BP
13556	GO:1900102	0.000628087	1	1	1	negative regulation of endoplasmic reticulum unfolded protein response	BP
14121	GO:1903489	0.000628087	1	1	1	positive regulation of lactation	BP
2726	GO:0006990	0.00148247	0.999999	1	2	positive regulation of transcription from RNA polymerase II promoter involved in unfolded protein response	BP
8964	GO:0045348	0.00151856	0.999999	1	2	positive regulation of MHC class II biosynthetic process	BP
11997	GO:0071236	0.00173812	0.999999	1	3	cellular response to antibiotic	BP
14736	GO:1990418	0.00175124	0.999999	1	3	response to insulin-like growth factor stimulus	BP
826	GO:0002639	0.00177486	0.999999	1	2	positive regulation of immunoglobulin production	BP
12126	GO:0071498	0.00189553	0.999999	1	3	cellular response to fluid shear stress	BP
675	GO:0002070	0.0019184	0.999999	1	3	epithelial cell maturation	BP
15002	GO:2000347	0.0023582	0.999998	1	3	positive regulation of hepatocyte proliferation	BP
12127	GO:0071499	0.00303381	0.999997	1	4	cellular response to laminar fluid shear stress	BP
13969	GO:1902916	0.00312405	0.999996	1	4	positive regulation of protein polyubiquitination	BP
12036	GO:0071332	0.00315454	0.999996	1	4	cellular response to fructose stimulus	BP
10772	GO:0055092	0.00339989	0.999996	1	5	sterol homeostasis	BP
7436	GO:0035356	0.00391195	0.999994	1	6	cellular triglyceride homeostasis	BP
8012	GO:0042137	0.00398197	0.999994	1	5	sequestering of neurotransmitter	BP
14874	GO:2000001	0.00406487	0.999994	1	5	regulation of DNA damage checkpoint	BP
8026	GO:0042167	0.00415622	0.999993	1	6	heme catabolic process	BP
13557	GO:1900103	0.0042506	0.999993	1	6	positive regulation of endoplasmic reticulum unfolded protein response	BP
13788	GO:1901985	0.00433299	0.999993	1	5	positive regulation of protein acetylation	BP
5216	GO:0019725	0.00489476	0.99999	1	6	cellular homeostasis	BP
11004	GO:0060394	0.00511052	0.999989	1	7	negative regulation of pathway-restricted SMAD protein phosphorylation	BP
5732	GO:0030335	0.0051888	0.999832	2	132	positive regulation of cell migration	BP
4565	GO:0016192	0.00540358	0.999821	2	144	vesicle-mediated transport	BP
9012	GO:0045582	0.00591541	0.999986	1	7	positive regulation of T cell differentiation	BP
12060	GO:0071375	0.0060048	0.999985	1	8	cellular response to peptide hormone stimulus	BP
5998	GO:0031062	0.00607881	0.999984	1	8	positive regulation of histone methylation	BP
7578	GO:0035726	0.00616805	0.999984	1	7	common myeloid progenitor cell proliferation	BP
3003	GO:0007502	0.00637056	0.999983	1	7	digestive tract mesoderm development	BP
14104	GO:1903427	0.00677587	0.99998	1	9	negative regulation of reactive oxygen species biosynthetic process	BP
12298	GO:0071966	0.00699845	0.999979	1	10	fungal-type cell wall polysaccharide metabolic process	BP
10224	GO:0050929	0.00701512	0.999979	1	8	induction of negative chemotaxis	BP
4024	GO:0010832	0.00713241	0.999978	1	10	negative regulation of myotube differentiation	BP
10769	GO:0055089	0.00727308	0.999977	1	9	fatty acid homeostasis	BP
10994	GO:0060378	0.00728683	0.999977	1	9	regulation of brood size	BP
13763	GO:1901800	0.00756543	0.999976	1	9	positive regulation of proteasomal protein catabolic process	BP
14966	GO:2000274	0.00792628	0.999973	1	9	regulation of epithelial cell migration, open tracheal system	BP
4451	GO:0015872	0.00816183	0.999971	1	10	dopamine transport	BP
6259	GO:0031670	0.0083024	0.99997	1	10	cellular response to nutrient	BP
3113	GO:0008078	0.00845461	0.999969	1	10	mesodermal cell migration	BP
9010	GO:0045579	0.00848428	0.999969	1	11	positive regulation of B cell differentiation	BP
13841	GO:1902236	0.00852871	0.999969	1	10	negative regulation of endoplasmic reticulum stress-induced intrinsic apoptotic signaling pathway	BP
3007	GO:0007509	0.00886611	0.999966	1	10	mesoderm migration involved in gastrulation	BP
14402	GO:1904707	0.00921378	0.999963	1	12	positive regulation of vascular associated smooth muscle cell proliferation	BP
2967	GO:0007432	0.00984461	0.999958	1	11	salivary gland boundary specification	BP
10489	GO:0051602	0.0102627	0.999953	1	14	response to electrical stimulus	BP
13058	GO:0098700	0.0105518	0.999951	1	13	neurotransmitter loading into synaptic vesicle	BP
15005	GO:2000353	0.0109325	0.999947	1	14	positive regulation of endothelial cell apoptotic process	BP
7449	GO:0035385	0.0112047	0.999944	1	14	Roundabout signaling pathway	BP
4436	GO:0015842	0.0112106	0.999944	1	14	aminergic neurotransmitter loading into synaptic vesicle	BP
10194	GO:0050884	0.0113174	0.999943	1	14	neuromuscular process controlling posture	BP
4145	GO:0014065	0.0115659	0.999941	1	13	phosphatidylinositol 3-kinase signaling	BP
14416	GO:1904754	0.0117384	0.99994	1	11	positive regulation of vascular associated smooth muscle cell migration	BP
7651	GO:0035924	0.0119595	0.999935	1	16	cellular response to vascular endothelial growth factor stimulus	BP
13583	GO:1900181	0.0135783	0.999916	1	17	negative regulation of protein localization to nucleus	BP
599	GO:0001935	0.0140927	0.99991	1	18	endothelial cell proliferation	BP
3302	GO:0008406	0.0141269	0.99991	1	15	gonad development	BP
2646	GO:0006828	0.0142139	0.999909	1	16	manganese ion transport	BP
10208	GO:0050908	0.0145154	0.999904	1	18	detection of light stimulus involved in visual perception	BP
2963	GO:0007427	0.0147084	0.999901	1	19	epithelial cell migration, open tracheal system	BP
4437	GO:0015844	0.0148366	0.9999	1	18	monoamine transport	BP
3070	GO:0007628	0.015255	0.999894	1	19	adult walking behavior	BP
2444	GO:0006511	0.0156462	0.999098	2	231	ubiquitin-dependent protein catabolic process	BP
12119	GO:0071479	0.0159237	0.999884	1	20	cellular response to ionizing radiation	BP
5983	GO:0031017	0.0167612	0.999871	1	21	exocrine pancreas development	BP
11096	GO:0060612	0.0170044	0.999867	1	23	adipose tissue development	BP
7275	GO:0035050	0.0170511	0.999867	1	20	embryonic heart tube development	BP
9700	GO:0048147	0.0173048	0.999862	1	21	negative regulation of fibroblast proliferation	BP
4569	GO:0016201	0.0174045	0.999861	1	21	synaptic target inhibition	BP
10944	GO:0060294	0.0194016	0.999827	1	21	cilium movement involved in cell motility	BP
3923	GO:0010608	0.0196178	0.999822	1	24	posttranscriptional regulation of gene expression	BP
9022	GO:0045600	0.0205335	0.999804	1	28	positive regulation of fat cell differentiation	BP
5484	GO:0022409	0.020556	0.999805	1	22	positive regulation of cell-cell adhesion	BP
3932	GO:0010632	0.0208746	0.999797	1	27	regulation of epithelial cell migration	BP
4567	GO:0016199	0.0210146	0.999797	1	21	axon midline choice point recognition	BP
6335	GO:0032008	0.0212183	0.999791	1	27	positive regulation of TOR signaling	BP
9640	GO:0048010	0.0218382	0.999778	1	27	vascular endothelial growth factor receptor signaling pathway	BP
6406	GO:0032212	0.0233606	0.999745	1	29	positive regulation of telomere maintenance via telomerase	BP
411	GO:0001558	0.0246355	0.999716	1	30	regulation of cell growth	BP
5964	GO:0030968	0.0249446	0.999709	1	30	endoplasmic reticulum unfolded protein response	BP
8071	GO:0042307	0.0262005	0.99968	1	28	positive regulation of protein import into nucleus	BP
921	GO:0003151	0.0270747	0.999656	1	34	outflow tract morphogenesis	BP
11559	GO:0070059	0.0272499	0.999653	1	29	intrinsic apoptotic signaling pathway in response to endoplasmic reticulum stress	BP
12046	GO:0071353	0.0289043	0.999608	1	32	cellular response to interleukin-4	BP
8018	GO:0042149	0.0297988	0.999581	1	38	cellular response to glucose starvation	BP
10446	GO:0051480	0.030184	0.999571	1	37	regulation of cytosolic calcium ion concentration	BP
3889	GO:0010508	0.0308104	0.999552	1	38	positive regulation of autophagy	BP
228	GO:0000723	0.0314545	0.999533	1	39	telomere maintenance	BP
2875	GO:0007269	0.0318273	0.999521	1	41	neurotransmitter secretion	BP
3625	GO:0009416	0.0325099	0.9995	1	42	response to light stimulus	BP
2636	GO:0006812	0.0363222	0.999375	1	42	cation transport	BP
2650	GO:0006836	0.0366935	0.99936	1	47	neurotransmitter transport	BP
3887	GO:0010506	0.0369352	0.999352	1	46	regulation of autophagy	BP
630	GO:0001975	0.0377823	0.999321	1	49	response to amphetamine	BP
9875	GO:0048666	0.0390724	0.999272	1	52	neuron development	BP
11685	GO:0070373	0.0405624	0.999215	1	53	negative regulation of ERK1 and ERK2 cascade	BP
11994	GO:0071230	0.044057	0.999071	1	58	cellular response to amino acid stimulus	BP
6050	GO:0031146	0.0458225	0.998995	1	58	SCF-dependent proteasomal ubiquitin-dependent protein catabolic process	BP
12037	GO:0071333	0.0469703	0.998943	1	61	cellular response to glucose stimulus	BP

## Sheet: BFA_CB_up_go_CC
category	over_represented_pvalue	under_represented_pvalue	numDEInCat	numInCat	term	ontology
6196	GO:0031501	0.00312769	0.999996	1	4	mannosyltransferase complex	CC
11569	GO:0070083	0.00398197	0.999994	1	5	clathrin-sculpted monoamine transport vesicle membrane	CC
14786	GO:1990635	0.00594098	0.999985	1	7	proximal dendrite	CC
12192	GO:0071666	0.00637056	0.999983	1	7	Slit-Robo signaling complex	CC
4500	GO:0016028	0.00674674	0.999981	1	8	rhabdomere	CC
681	GO:0002081	0.00775765	0.999974	1	9	outer acrosomal membrane	CC
3846	GO:0010339	0.0104863	0.999951	1	14	external side of cell wall	CC
680	GO:0002080	0.0112182	0.999944	1	14	acrosomal membrane	CC
3584	GO:0009277	0.0125892	0.999928	1	18	fungal-type cell wall	CC
13053	GO:0098691	0.0192424	0.999828	1	25	dopaminergic synapse	CC
7203	GO:0034703	0.0253967	0.999699	1	28	cation channel complex	CC
7724	GO:0036126	0.0469162	0.998945	1	60	sperm flagellum	CC
5044	GO:0019005	0.0499901	0.9988	1	63	SCF ubiquitin ligase complex	CC

## Sheet: BFA_CB_up_go_MF
category	over_represented_pvalue	under_represented_pvalue	numDEInCat	numInCat	term	ontology
1458	GO:0004553	0.000763025	0.999991	2	51	hydrolase activity, hydrolyzing O-glycosyl compounds	MF
4880	GO:0017076	0.00248071	0.999998	1	3	purine nucleotide binding	MF
1221	GO:0004074	0.00251697	0.999998	1	4	biliverdin reductase (NAD(P)+) activity	MF
1128	GO:0003938	0.00302434	0.999997	1	4	IMP dehydrogenase activity	MF
8193	GO:0042602	0.00318444	0.999996	1	5	riboflavin reductase (NADPH) activity	MF
5	GO:0000009	0.00392402	0.999994	1	5	alpha-1,6-mannosyltransferase activity	MF
1359	GO:0004376	0.00482968	0.999991	1	6	glycolipid mannosyltransferase activity	MF
1864	GO:0005335	0.0101467	0.999955	1	12	serotonin:sodium symporter activity	MF
4316	GO:0015279	0.0113847	0.999942	1	13	store-operated calcium channel activity	MF
8766	GO:0044389	0.0120185	0.999935	1	15	ubiquitin-like protein ligase binding	MF
7769	GO:0036312	0.0120721	0.999935	1	13	phosphatidylinositol 3-kinase regulatory subunit binding	MF
570	GO:0001872	0.0138707	0.999913	1	17	(1->3)-beta-D-glucan binding	MF
3360	GO:0008504	0.0148366	0.9999	1	18	monoamine transmembrane transporter activity	MF
3289	GO:0008381	0.0172872	0.999864	1	18	mechanosensitive ion channel activity	MF
18	GO:0000030	0.0191926	0.99983	1	24	mannosyltransferase activity	MF
9803	GO:0048495	0.0223872	0.999767	1	28	Roundabout binding	MF
6190	GO:0031490	0.0231226	0.999752	1	26	chromatin DNA binding	MF
11803	GO:0070679	0.0277325	0.999642	1	27	inositol 1,4,5 trisphosphate binding	MF
342	GO:0001085	0.0286495	0.999614	1	34	RNA polymerase II transcription factor binding	MF
328	GO:0000987	0.0302394	0.999568	1	40	cis-regulatory region sequence-specific DNA binding	MF

## Sheet: BFA_L_down_go_BP
category	over_represented_pvalue	under_represented_pvalue	numDEInCat	numInCat	term	ontology
7597	GO:0035794	1.13904e-05	1	3	7	positive regulation of mitochondrial membrane permeability	BP
4075	GO:0010940	2.71015e-05	1	3	9	positive regulation of necrotic cell death	BP
4068	GO:0010917	0.000247153	0.999994	3	18	negative regulation of mitochondrial membrane potential	BP
11293	GO:0061180	0.000463402	0.999997	2	5	mammary gland epithelium development	BP
2442	GO:0006508	0.00422215	0.999017	7	299	proteolysis	BP
8220	GO:0042694	0.00496435	0.999848	2	16	muscle cell fate specification	BP
8242	GO:0042744	0.00522397	0.999579	3	52	hydrogen peroxide catabolic process	BP
3039	GO:0007589	0.00621604	0.999783	2	18	body fluid secretion	BP
904	GO:0003100	0.00657384	1	1	1	regulation of systemic arterial blood pressure by endothelin	BP
8383	GO:0043114	0.0068073	0.99975	2	19	regulation of vascular permeability	BP
7631	GO:0035880	0.00690832	1	1	1	embryonic nail plate morphogenesis	BP
9034	GO:0045617	0.00690832	1	1	1	negative regulation of keratinocyte differentiation	BP
10557	GO:0051795	0.00690832	1	1	1	positive regulation of timing of catagen	BP
10989	GO:0060364	0.00690832	1	1	1	frontal suture morphogenesis	BP
12697	GO:0090427	0.00690832	1	1	1	activation of meiosis	BP
15174	GO:2001055	0.00690832	1	1	1	positive regulation of mesenchymal cell apoptotic process	BP
14965	GO:2000272	0.00699768	1	1	1	negative regulation of signaling receptor activity	BP
13006	GO:0097746	0.00771029	0.999697	2	20	regulation of blood vessel diameter	BP
10314	GO:0051146	0.00772395	0.999696	2	20	striated muscle cell differentiation	BP
654	GO:0002028	0.00870333	0.999634	2	21	regulation of sodium ion transport	BP
9916	GO:0048747	0.00983292	0.999557	2	23	muscle fiber development	BP
4604	GO:0016267	0.0116765	0.999423	2	24	O-glycan processing, core 1	BP
7686	GO:0036035	0.0118091	0.999965	1	2	osteoclast development	BP
6918	GO:0033633	0.0122749	0.999962	1	2	negative regulation of cell-cell adhesion mediated by integrin	BP
7886	GO:0038116	0.0122749	0.999962	1	2	chemokine (C-C motif) ligand 21 signaling pathway	BP
10144	GO:0050794	0.0122749	0.999962	1	2	regulation of cellular process	BP
12764	GO:0097022	0.0122749	0.999962	1	2	lymphocyte migration into lymph node	BP
2431	GO:0006486	0.012447	0.996868	6	279	protein glycosylation	BP
6654	GO:0032792	0.0130094	0.999958	1	2	negative regulation of CREB transcription factor activity	BP
4009	GO:0010814	0.0131317	0.999957	1	2	substance P catabolic process	BP
4011	GO:0010816	0.0131317	0.999957	1	2	calcitonin catabolic process	BP
7235	GO:0034959	0.0131317	0.999957	1	2	endothelin maturation	BP
8975	GO:0045453	0.0132904	0.999294	2	26	bone resorption	BP
555	GO:0001838	0.0136686	0.999953	1	2	embryonic epithelial tube formation	BP
5671	GO:0030237	0.0136686	0.999953	1	2	female sex determination	BP
6459	GO:0032349	0.0136686	0.999953	1	2	positive regulation of aldosterone biosynthetic process	BP
6756	GO:0033080	0.0136686	0.999953	1	2	immature T cell proliferation in thymus	BP
7860	GO:0038030	0.0136686	0.999953	1	2	non-canonical Wnt signaling pathway via MAPK cascade	BP
9133	GO:0045836	0.0136686	0.999953	1	2	positive regulation of meiotic nuclear division	BP
10872	GO:0060126	0.0136686	0.999953	1	2	somatotropin secreting cell differentiation	BP
10874	GO:0060129	0.0136686	0.999953	1	2	thyroid-stimulating hormone-secreting cell differentiation	BP
11145	GO:0060748	0.0136686	0.999953	1	2	tertiary branching involved in mammary gland duct morphogenesis	BP
11294	GO:0061184	0.0136686	0.999953	1	2	positive regulation of dermatome development	BP
11331	GO:0061369	0.0136686	0.999953	1	2	negative regulation of testicular blood vessel morphogenesis	BP
12309	GO:0072033	0.0136686	0.999953	1	2	renal vesicle formation	BP
12310	GO:0072034	0.0136686	0.999953	1	2	renal vesicle induction	BP
12348	GO:0072174	0.0136686	0.999953	1	2	metanephric tubule formation	BP
12365	GO:0072273	0.0136686	0.999953	1	2	metanephric nephron morphogenesis	BP
14884	GO:2000019	0.0136686	0.999953	1	2	negative regulation of male gonad development	BP
14905	GO:2000066	0.0136686	0.999953	1	2	positive regulation of cortisol biosynthetic process	BP
14944	GO:2000180	0.0136686	0.999953	1	2	negative regulation of androgen biosynthetic process	BP
14951	GO:2000225	0.0136686	0.999953	1	2	negative regulation of testosterone biosynthetic process	BP
7608	GO:0035815	0.0141457	0.999221	2	27	positive regulation of renal sodium excretion	BP
14204	GO:1903779	0.0145466	0.999186	2	28	regulation of cardiac conduction	BP
3080	GO:0008015	0.0149788	0.999149	2	28	blood circulation	BP
7701	GO:0036065	0.0199432	0.99734	3	84	fucosylation	BP
5869	GO:0030703	0.0199456	0.999867	1	3	eggshell formation	BP
7734	GO:0036151	0.0202274	0.999863	1	3	phosphatidylcholine acyl-chain remodeling	BP
4061	GO:0010894	0.0205341	0.999859	1	3	negative regulation of steroid biosynthetic process	BP
10910	GO:0060231	0.0205543	0.999859	1	3	mesenchymal to epithelial transition	BP
12344	GO:0072162	0.0205696	0.999858	1	3	metanephric mesenchymal cell differentiation	BP
7604	GO:0035810	0.0221231	0.99844	2	34	positive regulation of urine volume	BP
5713	GO:0030308	0.02382	0.996597	3	91	negative regulation of cell growth	BP
14011	GO:1903038	0.0249653	0.999765	1	4	negative regulation of leukocyte cell-cell adhesion	BP
3037	GO:0007586	0.025213	0.998089	2	36	digestion	BP
7002	GO:0034115	0.0253239	0.999758	1	4	negative regulation of heterotypic cell-cell adhesion	BP
8130	GO:0042447	0.0260249	0.999744	1	4	hormone catabolic process	BP
8118	GO:0042417	0.0261369	0.997976	2	38	dopamine metabolic process	BP
14423	GO:1904778	0.0264927	0.999735	1	4	positive regulation of protein localization to cell cortex	BP
1020	GO:0003416	0.0265799	0.999733	1	4	endochondral bone growth	BP
11606	GO:0070166	0.0266382	0.999732	1	4	enamel mineralization	BP
10742	GO:0055014	0.0269653	0.999725	1	4	atrial cardiac muscle cell development	BP
14071	GO:1903302	0.0270442	0.999724	1	4	regulation of pyruvate kinase activity	BP
417	GO:0001572	0.0272976	0.999719	1	4	lactosylceramide biosynthetic process	BP
3955	GO:0010706	0.0272976	0.999719	1	4	ganglioside biosynthetic process via lactosylceramide	BP
14066	GO:1903288	0.0300756	0.999635	1	5	positive regulation of potassium ion import across plasma membrane	BP
14272	GO:1904062	0.0300756	0.999635	1	5	regulation of cation transmembrane transport	BP
9871	GO:0048662	0.0307428	0.997396	2	41	negative regulation of smooth muscle cell proliferation	BP
13903	GO:1902533	0.031805	0.999592	1	5	positive regulation of intracellular signal transduction	BP
5520	GO:0023016	0.0322964	0.999579	1	5	signal transduction by trans-phosphorylation	BP
11302	GO:0061205	0.0323755	0.999577	1	5	paramesonephric duct development	BP
5521	GO:0023019	0.0334063	0.99955	1	5	signal transduction involved in regulation of gene expression	BP
5453	GO:0021955	0.0334963	0.999547	1	5	central nervous system neuron axonogenesis	BP
9062	GO:0045669	0.0339692	0.996957	2	44	positive regulation of osteoblast differentiation	BP
10313	GO:0051145	0.0339726	0.999534	1	5	smooth muscle cell differentiation	BP
11312	GO:0061312	0.0341138	0.99953	1	5	BMP signaling pathway involved in heart development	BP
3993	GO:0010766	0.0364296	0.999442	1	6	negative regulation of sodium ion transport	BP
4010	GO:0010815	0.0391008	0.999356	1	6	bradykinin catabolic process	BP
8128	GO:0042445	0.0392051	0.999353	1	6	hormone metabolic process	BP
10743	GO:0055015	0.0395494	0.999341	1	6	ventricular cardiac muscle cell development	BP
8162	GO:0042551	0.0403637	0.999313	1	6	neuron maturation	BP
9279	GO:0046373	0.0411921	0.999285	1	6	L-arabinose metabolic process	BP
540	GO:0001822	0.0415525	0.992617	3	115	kidney development	BP
6489	GO:0032414	0.0431624	0.999192	1	7	positive regulation of ion transmembrane transporter activity	BP
10121	GO:0050732	0.0443417	0.999147	1	7	negative regulation of peptidyl-tyrosine phosphorylation	BP
8593	GO:0043583	0.0444553	0.999142	1	7	ear development	BP
896	GO:0003081	0.0446318	0.999135	1	7	regulation of systemic arterial blood pressure by renin-angiotensin	BP
6673	GO:0032835	0.0453076	0.999109	1	7	glomerulus development	BP
3190	GO:0008217	0.045355	0.995223	2	52	regulation of blood pressure	BP
7415	GO:0035313	0.045634	0.999096	1	7	wound healing, spreading of epidermal cells	BP
944	GO:0003198	0.0463511	0.999067	1	7	epithelial to mesenchymal transition involved in endocardial cushion formation	BP
6720	GO:0032967	0.0464477	0.999063	1	7	positive regulation of collagen biosynthetic process	BP
8475	GO:0043312	0.0465272	0.991353	3	120	neutrophil degranulation	BP
5786	GO:0030501	0.0468456	0.994978	2	52	positive regulation of bone mineralization	BP
2817	GO:0007168	0.0481706	0.994754	2	53	receptor guanylyl cyclase signaling pathway	BP
10148	GO:0050801	0.0493024	0.998921	1	8	ion homeostasis	BP

## Sheet: BFA_L_down_go_CC
category	over_represented_pvalue	under_represented_pvalue	numDEInCat	numInCat	term	ontology
7514	GO:0035578	0.00158484	0.999918	3	34	azurophil granule lumen	CC
1936	GO:0005576	0.0034867	0.998356	23	1853	extracellular region	CC
12290	GO:0071944	0.00655084	0.999426	3	57	cell periphery	CC
6114	GO:0031302	0.00657384	1	1	1	intrinsic component of endosome membrane	CC
6509	GO:0032444	0.0202667	0.999862	1	3	activin responsive factor complex	CC
8019	GO:0042151	0.0203992	0.999861	1	3	nematocyst	CC

## Sheet: BFA_L_down_go_MF
category	over_represented_pvalue	under_represented_pvalue	numDEInCat	numInCat	term	ontology
1297	GO:0004252	0.000807368	0.999838	8	289	serine-type endopeptidase activity	MF
5240	GO:0019806	0.00269689	0.999942	2	12	bromide peroxidase activity	MF
1495	GO:0004601	0.00281425	0.99982	3	42	peroxidase activity	MF
5027	GO:0018834	0.0069251	1	1	1	dichloromethane dehalogenase activity	MF
6276	GO:0031718	0.00699768	1	1	1	type 1 cannabinoid receptor binding	MF
4601	GO:0016263	0.0116765	0.999423	2	24	glycoprotein-N-acetylgalactosamine 3-beta-galactosyltransferase activity	MF
243	GO:0000773	0.0138289	0.999952	1	2	phosphatidyl-N-methylethanolamine N-methyltransferase activity	MF
1498	GO:0004608	0.0138289	0.999952	1	2	phosphatidylethanolamine N-methyltransferase activity	MF
12483	GO:0080101	0.0138289	0.999952	1	2	phosphatidyl-N-dimethylethanolamine N-methyltransferase activity	MF
1787	GO:0005152	0.0195428	0.999872	1	3	interleukin-1 receptor antagonist activity	MF
11	GO:0000016	0.0200718	0.999865	1	3	lactase activity	MF
4864	GO:0017042	0.0200718	0.999865	1	3	glycosylceramidase activity	MF
4865	GO:0017046	0.0207969	0.99718	3	87	peptide hormone binding	MF
9609	GO:0047760	0.0234335	0.998294	2	35	butyrate-CoA ligase activity	MF
6315	GO:0031956	0.0235109	0.998285	2	35	medium-chain fatty acid-CoA ligase activity	MF
3328	GO:0008454	0.0271013	0.999723	1	4	alpha-1,3-mannosylglycoprotein 4-beta-N-acetylglucosaminyltransferase activity	MF
9532	GO:0047256	0.0271551	0.999722	1	4	lactosylceramide 1,3-N-acetyl-beta-D-glucosaminyltransferase activity	MF
3324	GO:0008447	0.0326387	0.99957	1	5	L-ascorbate oxidase activity	MF
4841	GO:0016941	0.0360076	0.996669	2	45	natriuretic peptide receptor activity	MF
5263	GO:0019870	0.0363782	0.999443	1	6	potassium channel inhibitor activity	MF
5702	GO:0030291	0.037944	0.999394	1	6	protein serine/threonine kinase inhibitor activity	MF
6938	GO:0033709	0.0403388	0.999314	1	6	D-arabinitol dehydrogenase, D-ribulose forming (NADP+) activity	MF
10655	GO:0052677	0.0403388	0.999314	1	6	D-arabinitol dehydrogenase, D-xylulose forming (NADP+) activity	MF
1047	GO:0003720	0.0447902	0.999129	1	7	telomerase activity	MF
9455	GO:0046920	0.0474192	0.994885	2	51	alpha-(1->3)-fucosyltransferase activity	MF
3308	GO:0008417	0.0493323	0.99456	2	52	fucosyltransferase activity	MF
5306	GO:0020037	0.0493423	0.983002	6	387	heme binding	MF
8552	GO:0043515	0.0497925	0.9989	1	8	kinetochore binding	MF

[truncated: 15 more sheets: BFA_L_up_go_BP, BFA_L_up_go_CC, BFA_L_up_go_MF, U1026_CB_down_go_BP, U1026_CB_down_go_CC, U1026_CB_down_go_MF, U1026_CB_up_go_BP, U1026_CB_up_go_CC, U1026_CB_up_go_MF, U1026_L_down_go_BP, U1026_L_down_go_CC, U1026_L_down_go_MF, U1026_L_up_go_BP, U1026_L_up_go_CC, U1026_L_up_go_MF]
