# Supplementary material for: ERK1/2 is an ancestral organising signal in spiral cleavage
Source: Research Square preprint supplement (doi:10.21203/rs.3.rs-793154/v1), 2021-08-23
Supplement: Supplementary file 7 [file 7ec3eaff686c505425337935.xlsx]

## Sheet: DE_genes
transcript id	BlastX	Log2 FC U0126 CB	P-adj U0126 CB	Log2 FC U0126 L	P-adj U0126 L	Log2 FC BFA CB	P-adj BFA CB	Log2 FC BFA L	P-adj BFA L
OFUSG04867.2	FAST3_XENLA	-5.38494	4.47687e-27	-3.41343	0.000387137	-5.75359	1.4759e-23	-3.12603	0.0029178
OFUSG03177.1	HMD1_CHICK	-3.2943	1.93322e-13	-3.06134	8.52523e-13	-3.3457	7.87389e-27	-2.47856	1.98959e-16
OFUSG04687.1	FER3L_MOUSE	-2.46989	9.23598e-06	-1.96563	0.00962955	-3.9764	7.39115e-23	-1.5789	0.0234856
OFUSG21500.1	RHXF1_HUMAN	-3.28162	8.29437e-09	-2.56153	0.00422071	-4.06281	2.76574e-21	-1.78399	0.0639627
OFUSG03481.1	BRN3_CHICK	-2.88361	6.39878e-20	-1.1324	0.00213213	-1.73279	0.00432836	-0.271532	1
OFUSG16504.1	WNT1_CHICK	-2.83477	1.26154e-11	-2.24893	1.42563e-08	-3.72152	1.18515e-24	-0.442102	1
OFUSG10776.1	PLMN_CANLF	-2.80778	0.0350597	-1.72478	0.0277236	-1.81356	0.0245767	0.352301	1
OFUSG14511.1	UN93A_XENLA	-2.51716	0.027229	-2.67335	2.20058e-08	-3.24916	0.00157768	-1.16109	0.215247
OFUSG23611.1	TM11C_MOUSE	-2.16313	0.043006	-6.63009	1.53938e-29	-0.788302	0.999932	-4.8541	7.0789e-19
OFUSG17833.1	AMOS_DROME	-2.07461	0.0420348	-2.2347	0.0311858	-1.9171	0.00479021	-1.35164	0.32076
OFUSG03915.1	LYPD6_DANRE	-1.83724	5.36471e-08	-0.968279	0.0458737	-1.83536	8.27768e-05	0.188986	1
OFUSG14965.1	LHX3_MOUSE	-1.49409	0.0126394	-1.64176	0.000343447	-3.24058	6.81019e-09	-1.05127	0.452256
OFUSG14478.1	ZFP26_MOUSE	-1.45476	0.0110308	-1.60559	0.00146634	-1.54421	0.000311698	-0.256447	1
OFUSG09940.1	EGL13_CAEEL	-1.23387	1.94321e-06	-0.932039	0.00082474	-1.2964	4.83811e-18	-0.0742028	1
OFUSG25918.1	LRP6_MOUSE	-0.00893213	0.999996	-1.06573	0.0240346	-0.977779	0.000268467	-0.821543	0.0213581
OFUSG20588.1	LAMA4_HUMAN	-7.59158	4.59733e-20	-0.866474	0.636669	-3.01997	8.91708e-19	0.261463	1
OFUSG23684.1	FUT8_XENTR	-5.38394	0.043006	-1.94533	0.941121	0.445495	0.999932	-2.14979	0.0249445
OFUSG17248.1	VWDE_HUMAN	-5.04933	1.94321e-06	-0.484553	1	-5.10131	4.91668e-07	0.55862	1
OFUSG05354.1	ARA_DROME	-4.95999	1.97814e-16	0.595216	1	-5.46657	4.01522e-20	-0.177466	1
OFUSG04867.1	FAST3_XENLA	-4.8275	1.34207e-09	-2.57592	0.137445	-6.14934	1.87882e-11	-2.00469	0.661145
OFUSG18439.1	NOGG_HUMAN	-4.67957	4.02936e-10	0.4092	1	-4.08117	1.49991e-08	0.652099	1
OFUSG16271.2	CALBP_ENTHI	-4.66038	0.043006	-1.61648	0.433873	0.0801539	0.999932	-2.02886	0.0335932
OFUSG09074.1	BSH_HUMAN	-4.49167	5.70641e-11	1.13955	0.242484	-5.61518	4.50528e-14	0.00397169	1
OFUSG01867.1	NOTC1_XENLA	-4.09168	9.55626e-31	-1.19541	0.000257656	-1.07691	0.999932	-0.638815	1
OFUSG17466.3	AP2B_HUMAN	-3.83316	2.5574e-08	-2.4764	0.0031613	-4.27487	0.661583	0.2927	1
OFUSG26823.1	NA	-3.52043	5.79251e-08	-3.68406	9.83147e-09	-1.37648	0.661583	-0.521323	1
OFUSG09682.1	FOXJ3_HUMAN	-3.42958	2.96708e-13	-1.81091	0.00557939	-0.0825248	0.999932	-1.10084	0.72475
OFUSG19726.1	NA	-3.42922	1.8041e-10	0.118467	1	-4.05833	4.75204e-09	-0.0183769	1
OFUSG06474.1	GATA3_DANRE	-3.41161	6.92595e-14	-1.80435	0.000624484	-1.59751	0.485771	-1.13461	0.847217
OFUSG23405.1	NA	-2.96041	0.0112414	-0.469898	1	-5.31901	1.3403e-05	-0.913077	0.831914
OFUSG02255.1	MB212_XENTR	-2.82251	0.00240877	-2.30748	0.00107411	-1.32906	0.999932	-1.87501	0.106817
OFUSG07317.1	CALL3_RAT	-2.79233	2.40104e-05	-0.925453	0.896359	-3.04062	2.22109e-07	-0.43926	1
OFUSG03664.1	SC6A6_HUMAN	-2.73976	9.85346e-16	0.712288	0.467593	-2.45713	4.71611e-11	-0.145891	1
OFUSG24119.1	TBX3_RAT	-2.69949	0.00134072	-1.5241	0.300434	-3.41352	5.12181e-06	-1.12917	0.852001
OFUSG11344.1	DLL1_HUMAN	-2.5827	9.76014e-29	0.446193	0.801401	-1.63051	1.66959e-07	-0.0850058	1
OFUSG20191.1	NA	-2.57043	1.82237e-11	0.0280134	1	-2.60413	2.20994e-11	0.290202	1
OFUSG13716.1	FD3_DROME	-2.44998	1.18935e-07	0.572463	1	-2.91653	4.13782e-14	-0.0976589	1
OFUSG04738.1	BAMBI_MOUSE	-2.03676	0.0162972	-0.95137	1	-2.52423	0.000242497	-0.779071	1
OFUSG09205.1	NA	-2.00124	1.25776e-05	-0.0177996	1	-1.27579	0.0201837	-0.111675	1
OFUSG17417.1	CAPR2_HUMAN	-1.91136	0.000273133	-0.939024	0.104653	-2.10165	3.04747e-05	-0.97032	0.0954329
OFUSG03260.1	CNBD2_MACFA	-1.90683	0.0170188	-0.478789	1	-1.4856	1.80367e-06	-0.379478	1
OFUSG09779.1	WNT2B_HUMAN	-1.82584	0.00389899	-1.31782	0.059548	-3.35021	3.8122e-12	-0.477861	1
OFUSG03145.1	PRY1_YEAST	2.93625	0.0175749	2.74798	1.72817e-11	-0.965717	0.999932	0.165799	1
OFUSG04758.2	HOIL1_DANRE	-3.3543	0.999996	15.5503	0.0213933	-0.905797	0.999932	22.5819	1.72736e-05
OFUSG07688.1	NA	-3.08794	0.999996	-3.634	0.000312488	0.0772945	0.999932	-3.27863	0.00139241
OFUSG07843.1	ECEL1_RAT	-2.63743	0.340725	-4.66896	8.03591e-08	-0.316971	0.999932	-2.64373	0.00183994
OFUSG04511.1	NA	-2.33045	0.999996	-6.5601	1.89615e-29	-0.917322	0.999932	-7.23766	9.44265e-19
OFUSG24262.2	NA	-2.04856	0.999996	-6.37986	1.03666e-11	0.800085	0.999932	-6.27528	1.12063e-11
OFUSG01802.1	NA	-1.86469	0.108326	-1.94674	0.00215096	-1.94871	0.0227359	-0.0511915	1
OFUSG01612.1	MYPH_ECHGR	-1.61248	0.8427	-2.79659	1.72099e-19	0.0262979	0.999932	-2.42319	9.20791e-22
OFUSG11711.1	MATN1_MOUSE	-1.59748	0.336002	-2.67776	1.91728e-05	-1.63515	0.0345391	0.626184	0.971586
OFUSG09045.2	NA	-1.55717	0.999996	-7.4752	8.35314e-15	-0.46188	0.999932	-5.24583	2.12151e-07
OFUSG08067.1	EABF_STRCO	-1.54133	0.999996	-2.90738	0.00573359	-1.61844	0.999932	-2.43113	0.0144823
OFUSG04688.1	FER3_DROME	-1.41878	0.999996	-4.43679	0.000441439	-0.643526	0.999932	-3.39313	0.000306942
OFUSG13471.1	MGT4A_XENLA	-1.38614	0.999996	-3.06973	4.23789e-05	-0.31419	0.999932	-2.45871	0.0252556
OFUSG17455.1	STAR_DROME	-1.25335	0.999996	-4.01788	3.63779e-09	-1.46102	0.999932	-3.01031	8.59443e-07
OFUSG13264.2	NA	-1.20319	0.999996	-1.92238	1	21.0418	0.000258766	-33.8061	4.39529e-13
OFUSG24263.1	NA	-1.1945	0.999996	-5.80594	7.99103e-16	1.48439	0.999932	-5.51022	1.29777e-45
OFUSG23411.1	DEAF1_DROME	-1.18105	0.000219691	-0.851659	0.0164043	-0.942333	0.628383	-0.144542	1
OFUSG10465.1	NA	-1.1745	0.999996	-6.9513	1.03962e-17	-0.399789	0.999932	-5.68276	9.05498e-14
OFUSG12175.1	NA	-1.14957	0.999996	-5.71985	2.60536e-06	0.784119	0.999932	-2.52215	0.0110774
OFUSG07842.1	ECE1_HUMAN	-1.13023	0.52959	-5.26094	3.05998e-44	-0.73717	0.999932	-3.93237	1.17087e-29
OFUSG04853.1	IATR_HORSE	-1.10397	0.999996	-4.75617	4.81833e-06	0.381169	0.999932	-2.76635	0.0244311
OFUSG05402.1	ANPRA_HUMAN	-1.07694	0.999996	-3.0942	7.43048e-05	0.812084	0.999932	-2.09063	0.00334556
OFUSG10464.1	NA	-1.06305	0.999996	-7.06476	1.57858e-44	-1.9662	0.999932	-6.77794	5.37775e-24
OFUSG14894.2	NA	-1.0582	0.999996	-4.87011	5.2016e-06	1.4165	0.999932	-5.46569	0.00474072
OFUSG18725.1	NA	-1.0456	0.999996	-7.5042	5.15208e-18	-1.12366	0.999932	-7.12294	2.30591e-22
OFUSG04120.1	FUT2_BOVIN	-1.02589	0.999996	-5.67043	0.00402516	0.794098	NA	-3.86152	0.00470755
OFUSG17428.1	NA	-1.02068	0.999996	-5.46594	1.47632e-13	-0.87828	0.999932	-4.51755	1.2504e-14
OFUSG16840.1	NA	-1.0202	0.999996	-5.5943	1.45411e-12	0.167119	0.999932	-2.26258	0.000517722
OFUSG18717.1	IQEC1_HUMAN	-0.963491	4.9632e-05	-0.601591	0.0179752	-0.360919	0.999932	0.0865824	1
OFUSG07326.1	ARF_CRYNJ	-0.956375	0.999996	-0.160607	1	3.40586	0.00327801	3.66669	0.000233579
OFUSG12629.1	NA	-0.905545	0.999996	-9.01582	4.43262e-33	-3.8348	0.227119	-6.7278	4.63405e-25
OFUSG02775.1	NA	-0.905188	0.999996	-7.61651	3.24922e-31	-0.36553	0.999932	-5.26539	1.49314e-22
OFUSG16564.1	NA	-0.901451	0.999996	-7.1187	5.05861e-40	-0.414553	0.999932	-5.05491	2.27051e-70
OFUSG12704.1	NA	-0.891013	0.999996	-5.71414	7.71448e-28	-0.446115	0.999932	-4.96892	7.72451e-26
OFUSG02233.1	OAM_ASCSU	-0.881395	0.999996	-10.897	5.95391e-36	-0.0437207	0.999932	-9.90399	1.73893e-41
OFUSG17166.2	EYA4_MOUSE	-0.856469	0.0487694	-0.450099	0.998094	-1.17116	0.00308867	-0.331594	1
OFUSG23386.1	HES4B_XENLA	-0.847919	0.999996	-0.181646	1	-2.19318	9.65665e-20	-0.761769	0.0493388
OFUSG00896.1	NA	-0.802619	0.999996	-5.6756	6.01087e-23	-1.17044	0.999932	-5.1248	1.48868e-17
OFUSG26837.1	NA	-0.77147	0.999996	-2.28405	2.53502e-11	-0.71434	0.999932	-2.26787	2.35959e-06
OFUSG12191.1	NA	-0.761651	0.999996	-3.11878	0.000663778	1.40037	0.999932	-3.26439	1.04702e-07
OFUSG00622.1	NA	-0.689284	0.999996	-6.38467	1.93455e-28	0.0944908	0.999932	-5.85551	8.64241e-27
OFUSG09045.1	NA	-0.684799	0.999996	-7.94017	0.0002456	0.082424	NA	-5.86895	0.00509545
OFUSG13839.1	CALM_PLAFA	-0.680257	0.999996	-2.88065	0.0230158	0.0789662	0.999932	-1.73693	0.00490699
OFUSG05095.1	CKLF4_MOUSE	-0.679569	0.999996	-0.778405	0.00226929	-4.18005	0.0329202	-0.441351	0.748049
OFUSG03629.1	CEL2A_PIG	-0.658033	0.999996	-4.83466	4.36672e-07	0.318649	0.999932	-5.28822	2.66174e-06
OFUSG17427.1	NA	-0.654085	0.999996	-5.12665	3.47462e-16	1.12521	0.999932	-5.48814	2.52281e-06
OFUSG20940.1	NA	-0.632581	0.999996	-4.89289	1.74444e-23	-1.61242	0.999932	-1.50248	0.00481727
OFUSG06972.1	NA	-0.613156	0.999996	-6.89073	9.15883e-39	-0.809715	0.999932	-4.8856	9.98378e-56
OFUSG06117.1	SC5AC_HUMAN	-0.591924	0.999996	-4.92346	3.17308e-13	-0.349669	0.999932	-3.36647	4.89415e-18
OFUSG10594.1	NA	-0.588672	0.999996	-7.35102	2.08935e-22	0.554666	0.999932	-6.70234	2.46715e-46
OFUSG02232.1	ASO_TOBAC	-0.563136	0.999996	-3.48996	2.68695e-11	-0.0570202	0.999932	-3.49495	1.86568e-10
OFUSG23433.1	TRYP_ASTAS	-0.54936	0.999996	-2.55552	0.0101907	0.062264	0.999932	-1.52502	0.0252556
OFUSG17690.1	CUBN_HUMAN	-0.542914	0.486195	-1.72515	4.60535e-15	-0.603594	0.219757	-1.0695	1.00728e-05
OFUSG01380.1	SCUB2_DANRE	-0.534269	0.999996	-3.28384	1.14143e-10	-1.03949	0.999932	-2.49901	0.000236298
OFUSG08526.1	MYCPP_HUMAN	-0.504437	0.999996	-3.00393	0.000115748	-0.241127	0.999932	-2.4339	0.000411167
OFUSG19511.1	NA	-0.494813	0.999996	-2.36001	0.0149563	-1.72686	0.735117	-2.98852	0.000330359
OFUSG04660.1	NA	-0.490472	0.999996	-5.25092	4.56552e-13	-0.251089	0.999932	-3.70417	7.5565e-25
OFUSG06973.1	NA	-0.472203	0.999996	-7.59851	3.37138e-55	-0.227867	0.999932	-6.48544	1.7926e-125
OFUSG05625.1	NA	-0.454693	0.999996	-3.39813	7.23785e-11	0.224621	0.999932	-2.27689	0.000365065
OFUSG22929.1	NA	-0.448069	0.999996	-2.7284	0.000106991	0.100073	0.999932	-2.18213	0.0418506
OFUSG23304.1	MRC1_HUMAN	-0.44746	0.999996	-2.03803	0.0233065	-0.482548	0.999932	-1.4691	0.0277754
OFUSG17198.1	UN93A_XENLA	-0.437334	0.999996	-3.47293	9.88721e-14	-0.24346	0.999932	-2.70169	0.00343093
OFUSG12980.1	NA	-0.433293	0.999996	-2.62598	0.000872092	0.0398676	0.999932	-2.38227	0.000420826
OFUSG25551.1	PXDN_MOUSE	-0.417112	0.999996	-1.12949	0.00530912	-0.159809	0.999932	-0.884588	0.00344845
OFUSG09846.2	NA	-0.412364	0.999996	-9.09865	0.0012238	14.5704	0.01181	1.58051	1
OFUSG04457.1	NA	-0.40817	0.999996	-6.13774	4.14845e-36	-1.02823	0.999932	-3.78673	5.00272e-14
OFUSG21358.1	NA	-0.404532	0.999996	-4.7414	2.63736e-06	-0.0503828	0.999932	-4.23181	2.84188e-05
OFUSG21205.1	NA	-0.401262	0.999996	-4.82106	1.48252e-06	-1.23398	0.999932	-4.95629	0.000124205
OFUSG03880.1	NA	-0.39994	0.999996	-6.87664	7.88773e-23	0.115565	0.999932	-5.57572	7.77489e-14
OFUSG11280.1	NA	-0.381077	0.999996	-6.51081	2.662e-22	0.379026	0.999932	-5.99185	1.54763e-31
OFUSG17533.1	NA	-0.379416	0.999996	-7.24746	2.94764e-39	-0.735466	0.999932	-7.41619	4.0374e-27
OFUSG02230.1	NA	-0.368012	0.999996	-8.31879	2.18207e-46	0.224523	0.999932	-6.80578	4.71585e-36
OFUSG16500.1	NA	-0.356748	0.999996	-3.19273	9.8712e-11	0.290264	0.999932	-2.97974	1.89828e-11
OFUSG09641.1	NA	-0.353136	0.999996	-6.34347	1.74444e-23	-0.606106	0.999932	-6.11614	2.4254e-34
OFUSG04158.1	NA	-0.349068	0.999996	-5.69163	7.20708e-18	-0.486323	0.999932	-5.51255	2.3761e-42
OFUSG17424.1	MRC1_HUMAN	-0.34613	0.999996	-1.30531	0.00292841	0.0654607	0.999932	1.03364	0.000165695
OFUSG09326.1	PRAF1_HUMAN	-0.317843	0.654181	-0.0592865	1	0.769226	0.0035927	0.692586	0.0058824
OFUSG26732.1	OVCH1_HUMAN	-0.292659	0.999996	-2.48261	2.22834e-11	-0.580659	0.999932	-2.45581	5.28122e-11
OFUSG02319.1	FZD1_XENLA	-0.275223	0.999996	-2.09838	9.26209e-08	0.0949292	0.999932	-0.988641	0.00706605
OFUSG19828.1	NA	-0.26209	0.999996	-2.87059	9.5753e-05	-0.755825	0.999932	-2.6378	0.000288476
OFUSG06576.1	NA	-0.243108	0.999996	-7.15757	1.05619e-54	-0.238851	0.999932	-6.7073	2.63019e-51
OFUSG01512.1	NA	-0.224003	0.999996	-4.6937	6.70435e-12	-0.108286	0.999932	-3.66829	6.4775e-05
OFUSG05673.1	MSX2_MOUSE	-0.222481	0.999996	-2.57449	1.68546e-11	-0.699845	0.999932	-1.63489	0.000762422
OFUSG00810.1	DCMA_METLD	-0.209304	0.999996	-2.9987	1.23582e-08	-0.204743	0.999932	-3.16075	6.86805e-12
OFUSG17263.1	NEP_DROME	-0.203424	0.999996	-1.72845	0.00252837	0.468441	0.999932	-1.78887	0.000463455
OFUSG20499.1	ANPRA_HUMAN	-0.192333	0.999996	-2.01449	0.00252837	-0.496914	0.999932	-1.95987	0.00147899
OFUSG08805.1	VKT3_STIHA	-0.190577	0.999996	-4.78886	8.07088e-11	-1.32834	0.999932	-3.6776	5.35999e-19
OFUSG12159.1	BMP4_XENLA	-0.179012	0.999996	-1.78148	2.96005e-19	0.159264	0.999932	-0.704696	0.0114922
OFUSG05157.1	FBP1_STRPU	-0.170785	0.999996	-3.0319	9.18658e-10	-0.16448	0.999932	-1.75337	0.00983901
OFUSG00872.1	NA	-0.166695	0.999996	-3.94101	1.23634e-09	-0.244883	0.999932	-4.18524	5.9494e-09
OFUSG16129.1	NA	-0.143192	0.999996	-3.92411	2.28306e-12	-0.111647	0.999932	-2.77899	0.000288476
OFUSG19830.1	NA	-0.137359	0.999996	-2.6976	4.79465e-10	-0.0955566	0.999932	-2.33687	1.30106e-07
OFUSG26111.1	DCST1_HUMAN	-0.114663	0.999996	-3.09653	5.2016e-06	0.0609842	0.999932	-2.1592	0.00022478
OFUSG13327.1	FBX4_BOVIN	-0.107937	0.999996	-0.174126	1	5.94799	1.80003e-28	2.27643	0.000585354
OFUSG17402.1	TC1DB_XENLA	-0.0987914	0.999996	-3.34663	1.46956e-08	0.398571	0.999932	-2.89464	0.000625401
OFUSG04904.1	NA	-0.0870326	0.999996	-6.27778	8.75906e-11	-0.908477	0.999932	-6.5431	7.40323e-05
OFUSG15267.1	XBP1_RAT	-0.0836655	0.999996	0.0884862	1	2.91786	8.88916e-17	1.08321	0.0447083
OFUSG12160.1	Y1483_SYNY3	-0.0631859	0.999996	-4.22604	1.77039e-14	0.296667	0.999932	-2.41031	1.71037e-08
OFUSG09230.1	PXDN_MOUSE	-0.0568718	0.999996	-4.3008	6.49051e-09	-0.393623	0.999932	-4.12357	9.18717e-11
OFUSG20903.1	NA	-0.0522314	0.999996	-5.44846	5.58085e-11	0.639738	0.999932	-4.4856	6.16973e-10
OFUSG09044.1	NA	-0.0507213	0.999996	-4.31191	1.72804e-44	-0.134279	0.999932	-3.15521	1.50035e-15
OFUSG13755.2	WNT4_HUMAN	-0.0345033	0.999996	-3.78118	6.6105e-05	-0.0197861	0.999932	-3.30972	3.7348e-10
OFUSG21956.1	NID2_HUMAN	-0.032051	0.999996	-1.89761	2.31849e-16	0.065771	0.999932	-1.04083	1.13172e-07
OFUSG05970.1	NA	-0.0285339	0.999996	-7.63092	6.59708e-52	-0.0643419	0.999932	-7.71907	4.76365e-53
OFUSG23310.1	BMP7_MOUSE	-0.0277727	0.999996	-1.65271	1.23634e-09	0.103156	0.999932	-0.779345	5.35472e-05
OFUSG20660.1	NA	-0.0242404	0.999996	-5.06052	4.45877e-15	0.111516	0.999932	-4.44673	2.07659e-30
OFUSG13669.1	NA	-0.0157892	0.999996	-3.89522	6.86099e-13	-0.125024	0.999932	-3.76257	1.50973e-13
OFUSG11085.1	NA	-0.00350772	0.999996	-2.7106	0.0277236	-0.164646	0.999932	-2.67742	0.00116442
OFUSG07516.1	FMRF_APLCA	0.00312106	0.999996	-3.97232	2.03843e-10	-0.430974	0.999932	-3.48325	3.49678e-09
OFUSG13723.1	NA	0.00425377	0.999996	-3.27084	0.000387137	0.658581	0.999932	-2.78971	1.52267e-06
OFUSG13011.1	TMPS9_RAT	0.00997654	0.999996	-4.21637	1.1844e-27	-0.24029	0.999932	-2.32426	0.000907607
OFUSG21096.1	DFP_BOMMO	0.0138197	0.999996	-1.8487	0.0106724	-0.228303	0.999932	-1.34988	0.0161002
OFUSG23685.1	NA	0.0145482	0.999996	-1.93359	2.86763e-08	-0.0190075	0.999932	-1.9198	0.000377681
OFUSG05866.1	COPG2_TAKRU	0.0310505	0.999996	-0.0284753	1	0.936213	0.00193778	0.992096	0.000234477
OFUSG12986.1	SSPO_HUMAN	0.0407252	0.999996	-1.64358	0.0131701	0.0353569	0.999932	-1.7623	0.000174554
OFUSG01655.1	NA	0.0427506	0.999996	-6.22532	0.00521669	0.0779094	NA	-5.79521	0.00325528
OFUSG01655.2	NA	0.0427506	0.999996	-6.22532	0.00521669	0.0779094	NA	-5.79521	0.00325528
OFUSG01048.1	SPON1_CHICK	0.0481105	0.999996	-1.05346	4.58551e-14	0.0254689	0.999932	-0.56806	1.31086e-05
OFUSG04462.1	CHLE_HORSE	0.0535597	0.999996	-3.20933	2.45721e-05	-0.260876	0.999932	-2.61446	6.66064e-06
OFUSG16478.1	NA	0.0543395	0.999996	-7.58829	1.67174e-29	0.232093	0.999932	-5.68927	1.61441e-46
OFUSG13702.1	NA	0.064766	0.999996	-6.78199	1.50151e-43	-0.292288	0.999932	-7.17233	3.95315e-44
OFUSG09045.3	NA	0.0680872	0.999996	-1.28927	7.8646e-07	0.0534623	0.999932	-0.977836	0.0184898
OFUSG04121.1	NA	0.0694036	0.999996	-5.29082	3.10258e-14	0.116796	0.999932	-3.19289	1.73669e-13
OFUSG10473.1	ADRB2_CAVPO	0.072076	0.999996	-3.09577	8.18358e-07	-0.334823	0.999932	-2.52336	0.000990825
OFUSG03236.1	F1142_HUMAN	0.0725014	0.999996	-0.0964077	1	1.69071	0.000102891	1.54114	0.000308921
OFUSG10971.1	C1GTB_DANRE	0.0796656	0.999996	-2.83492	9.3783e-07	0.228435	0.999932	-2.84192	5.3281e-06
OFUSG04119.2	NA	0.0830378	0.999996	-2.94376	7.27543e-07	0.295953	0.999932	-1.58574	0.0240729
OFUSG03819.1	SRA1_MOUSE	0.0846147	0.999996	0.118131	1	0.814628	0.0244557	0.779026	0.0203328
OFUSG04510.1	NA	0.0913279	0.999996	-1.22122	6.29764e-05	0.0111142	0.999932	-1.07731	0.0269686
OFUSG10780.1	CHS2_CAEEL	0.0934235	0.999996	-2.52031	7.86764e-12	-0.184504	0.999932	-2.19838	3.25584e-11
OFUSG15688.1	NA	0.0939847	0.999996	0.0370506	1	5.40055	4.83811e-18	2.63643	0.000140604
OFUSG25663.1	RFX6_MOUSE	0.0967995	0.999996	-2.14352	3.92477e-06	-0.767712	0.999932	-1.36177	0.00365581
OFUSG11909.1	ZNT6A_XENLA	0.109987	0.999996	0.0160264	1	0.780917	0.0461257	0.757713	0.0398769
OFUSG09247.1	TMPS9_HUMAN	0.122357	0.999996	-5.07139	1.26654e-33	0.0710079	0.999932	-4.33806	1.36971e-07
OFUSG24444.1	NA	0.125996	0.999996	-3.2307	2.67685e-05	-0.00278576	0.999932	-2.93078	0.0011636
OFUSG12396.1	COG8_BOVIN	0.133101	0.999996	0.0199138	1	0.836401	0.0353089	0.914411	0.00469483
OFUSG04662.1	NA	0.13986	0.999996	-7.84544	6.0553e-46	0.241542	0.999932	-5.77877	1.90354e-34
OFUSG08622.1	NA	0.141993	0.999996	-3.57884	3.05296e-09	-0.974047	0.999932	-3.32778	1.46253e-07
OFUSG04547.1	NA	0.145603	0.999996	-4.59366	7.50237e-10	-0.74925	0.999932	-4.12009	1.97517e-09
OFUSG13912.1	NA	0.148735	0.999996	-2.72313	0.00838206	0.0790871	0.999932	-2.53004	0.021931
OFUSG22330.1	NA	0.150284	0.999996	-8.43589	4.51381e-53	-0.732622	0.999932	-7.03011	9.23765e-47
OFUSG17516.2	NEP_DROME	0.174123	0.999996	-2.16019	1.4718e-13	-0.27788	0.999932	-1.79372	5.28705e-12
OFUSG13200.1	NB5R5_MOUSE	0.176126	0.999996	-0.885668	0.0120609	-0.0809288	0.999932	-0.904912	0.00081065
OFUSG12700.1	NA	0.184612	0.999996	-7.29967	2.50497e-40	0.297364	0.999932	-6.83294	4.32735e-34
OFUSG01388.1	NA	0.200594	0.999996	-3.43841	0.0240346	-1.38171	0.999932	-3.38974	0.00228731
OFUSG05840.1	NA	0.201357	0.999996	-3.26651	1.20719e-13	-0.354931	0.999932	-1.69233	0.000355903
OFUSG05968.1	HM09_CAEEL	0.209086	0.999996	-2.5424	9.92656e-11	-0.0880277	0.999932	-1.82052	0.000500138
OFUSG07531.1	NCS1_CAEEL	0.214382	0.999996	-2.31929	0.000445029	0.553689	0.999932	-0.74441	0.00426212
OFUSG02178.1	NA	0.23229	0.999996	-3.45331	0.00307367	0.289476	0.999932	-3.2399	0.00128646
OFUSG06808.1	NA	0.237546	0.999996	-6.89748	2.71899e-34	0.204975	0.999932	-6.27318	9.85058e-41
OFUSG19658.1	CR3L3_BOVIN	0.245303	0.999996	0.211709	1	1.27362	1.3403e-05	1.13045	0.000120308
OFUSG18743.1	NA	0.250102	0.999996	-5.43503	4.78372e-09	3.07627	0.944096	-4.96045	1.52586e-07
OFUSG00525.1	SCUB2_DANRE	0.25022	0.999996	-3.07633	0.0010925	-0.189969	0.999932	-3.11504	0.000148608
OFUSG08010.5	TNNT_DROME	0.263106	0.999996	-2.64236	4.78486e-15	-0.0550382	0.999932	-0.801505	0.0296167
OFUSG08606.1	FUCTC_DROME	0.269398	0.999996	-3.68814	9.62698e-07	0.297593	0.999932	-2.63226	0.00605379
OFUSG07537.1	C1GLT_BOVIN	0.277142	0.999996	-2.13933	0.000811107	-0.0199487	0.999932	-1.62038	0.0107357
OFUSG00894.1	NA	0.284539	0.999996	-2.33888	0.000818102	-0.0273383	0.999932	-2.19325	0.00138397
OFUSG10128.1	CALM_PATSP	0.28563	0.999996	-3.66172	1.16943e-06	-0.269151	0.999932	-3.554	0.0107357
OFUSG19834.1	CSMD1_MOUSE	0.285979	0.999996	-2.9249	4.34508e-08	0.785173	0.999932	-2.17756	9.47876e-06
OFUSG08009.1	NA	0.292482	0.999996	-3.34602	5.62977e-23	0.374165	0.999932	-1.47345	0.00252998
OFUSG21931.1	ARF1_SOLTU	0.29825	0.999996	-0.235899	1	7.50621	3.31881e-19	2.96716	0.00222125
OFUSG18557.2	PLI2B_ARATH	0.315149	0.999996	-4.00144	6.30921e-47	-0.339845	0.999932	-1.90343	2.83517e-06
OFUSG16268.1	NA	0.320761	0.999996	-7.61393	9.05421e-31	1.09509	0.999932	-6.77805	6.49413e-38
OFUSG14153.1	ACES_CULPI	0.332033	0.999996	-1.97456	0.00151373	-0.246157	0.999932	-1.24264	0.00138397
OFUSG07567.1	B3G5A_XENLA	0.33763	0.999996	-5.30895	0.000467082	2.00254	NA	-6.77244	4.44084e-05
OFUSG00459.1	PRDM1_HUMAN	0.351945	0.999996	-1.25775	0.00774833	0.272922	0.999932	-0.990853	0.0270559
OFUSG10566.1	NA	0.356529	0.999996	-9.77936	9.54228e-44	0.0655199	0.999932	-9.44696	2.62934e-72
OFUSG26311.1	SEM5A_HUMAN	0.370665	0.0020847	0.287094	0.0131662	0.266154	0.999932	-0.157883	1
OFUSG22169.1	LAT4_BOVIN	0.397095	0.999996	-4.19169	7.68023e-13	0.330759	0.999932	-2.28643	1.09476e-11
OFUSG04459.1	NA	0.40211	0.999996	-4.18284	0.000102007	0.527835	0.999932	-3.64186	8.03299e-07
OFUSG00479.1	TBXT1_BRAFL	0.411352	0.999996	-1.7846	9.83147e-09	0.42465	0.999932	-1.3639	0.00123863
OFUSG06918.1	CO6A3_HUMAN	0.412572	0.999996	-1.90062	0.0212331	-0.142956	0.999932	-1.36098	0.0420384
OFUSG01215.1	FZ10B_XENLA	0.41405	0.999996	-1.66875	6.0736e-11	0.323223	0.999932	-1.20307	0.00350293
OFUSG03941.1	FUCTC_DROME	0.418194	0.999996	-4.52991	2.13389e-05	-0.145773	0.999932	-2.46804	0.0194221
OFUSG04407.1	NA	0.425604	0.999996	-2.18978	4.26695e-05	0.301081	0.999932	-1.27491	0.0304784
OFUSG05964.1	PXDN_XENTR	0.445112	0.999996	-4.30618	2.24796e-07	0.801349	0.999932	-3.30366	6.58761e-20
OFUSG18720.1	NA	0.451521	0.999996	-6.42168	1.03311e-28	0.109736	0.999932	-6.37066	3.01389e-40
OFUSG02056.1	NA	0.465753	0.999996	-5.86237	3.49344e-12	0.293238	0.999932	-5.53998	6.03767e-12
OFUSG01675.1	RERG_BOVIN	0.492465	0.999996	-2.48247	0.0127263	-0.0945947	0.999932	-1.79477	0.000199743
OFUSG04608.1	MLRP2_ACRMI	0.509303	0.999996	-3.00392	1.45885e-07	0.952746	0.696621	-2.30329	1.15509e-10
OFUSG10463.1	NA	0.588912	0.999996	-6.71769	9.07475e-30	0.515016	0.999932	-6.93116	3.96682e-50
OFUSG21702.1	PLB1_HUMAN	0.590863	0.999996	-4.35541	2.66315e-12	0.194137	0.999932	-3.56715	1.09022e-08
OFUSG02229.1	NA	0.627285	0.999996	-4.99731	3.56292e-05	-0.207118	0.999932	-5.32	9.54701e-05
OFUSG17547.1	CS081_HUMAN	0.636438	0.999996	-2.62915	1.10457e-05	0.818238	0.999932	-2.32623	0.000917111
OFUSG19854.1	NA	0.644551	0.999996	-6.12879	7.24321e-22	-0.53276	0.999932	-4.52081	2.73519e-29
OFUSG09762.1	NA	0.679361	0.999996	-1.12093	0.0117931	-0.463087	0.999932	-0.917039	0.0217772
OFUSG12647.1	NA	0.71115	0.999996	-6.63294	8.39132e-27	0.665207	0.999932	-7.16225	1.69029e-30
OFUSG13357.1	GRID1_HUMAN	0.716327	0.999996	-1.64743	0.0364367	0.605667	0.999932	-1.88968	6.15223e-05
OFUSG14628.1	NA	0.722155	0.999996	-4.05831	1.11362e-09	-0.146259	0.999932	-3.83336	3.28346e-08
OFUSG26470.1	NA	0.722726	0.999996	-8.95503	1.26899e-53	0.110111	0.999932	-8.04949	1.97905e-54
OFUSG10311.1	PDLI1_BOVIN	0.735001	0.999996	-2.92056	3.59187e-16	-0.0796733	0.999932	-1.84794	3.9484e-07
OFUSG00871.3	FHL2_RAT	0.780879	0.999996	-4.30571	0.00921996	-0.82648	0.999932	-1.70477	0.00420966
OFUSG21401.1	NA	0.846746	0.999996	-7.2648	4.95231e-14	1.09835	0.999932	-6.96176	5.89213e-18
OFUSG08801.1	DERP3_DERPT	0.889967	0.999996	-4.25786	3.05615e-10	-0.163706	0.999932	-4.75373	4.85465e-08
OFUSG16477.1	NA	0.974209	0.999996	-6.55453	6.88955e-12	-0.206092	0.999932	-4.34609	3.94522e-08
OFUSG16758.1	NA	1.10991	0.999996	-8.84261	3.15356e-70	-0.723066	0.999932	-7.95362	2.62934e-72
OFUSG01719.1	NA	1.28769	0.999996	-9.8774	6.20962e-33	-1.20078	0.999932	-8.38657	3.21197e-48
OFUSG22418.1	FABP1_DORPE	1.59161	0.999996	-3.97945	0.000779212	-0.971373	0.999932	-3.57358	1.17936e-16
OFUSG04853.2	VKTTI_NAJNA	1.76165	0.999996	-4.76954	2.82613e-07	-0.255867	0.999932	-3.03802	0.039785
OFUSG08364.1	NA	1.86423	0.822746	-7.59894	1.65942e-24	0.0969864	0.999932	-7.1943	3.95315e-44
OFUSG26730.1	NA	2.00751	0.999996	-4.93173	8.08029e-05	-1.18922	0.999932	-2.95955	0.00212518
OFUSG11521.1	YT66_CAEEL	2.33011	0.999996	-2.65016	5.49452e-07	0.0776029	0.999932	-2.03317	0.000113706
OFUSG14894.1	CBD1_CAEEL	2.7534	0.999996	-5.22452	1.756e-10	-1.72983	0.999932	-4.04144	0.0011636
OFUSG01117.4	M3K15_HUMAN	-15.7316	0.0281846	0.230565	1	0.0765015	NA	-0.407386	1
OFUSG13749.3	R3HD2_HUMAN	-9.64458	0.0323528	-2.42421	1	0.0392522	0.999932	-0.435422	1
OFUSG18983.3	JKIP3_MOUSE	-8.82023	0.0442321	-0.137274	1	2.09262	0.999932	-0.285071	1
OFUSG13103.1	BAT38_CAEEL	-8.33187	0.0301283	-0.43056	1	5.44198	0.107639	0.247721	1
OFUSG09975.2	NA	-7.75893	4.9632e-05	0.227948	1	-0.0575933	0.999932	0.37293	1
OFUSG13663.1	NA	-7.66263	1.39211e-61	-2.04881	1.86156e-07	-0.656628	0.999932	-0.312937	1
OFUSG11319.1	CHSTB_RAT	-7.44105	5.90503e-05	0.323056	1	-0.342704	0.999932	0.234179	1
OFUSG16704.2	SODC_PRIGL	-7.32141	0.0229112	0.328927	1	-0.271181	0.999932	-1.60706	1
OFUSG15511.4	NCF1_BOVIN	-7.28336	3.09711e-06	0.109457	1	-2.06884	0.999932	0.00654012	1
OFUSG02045.2	NTCP7_DANRE	-7.13897	0.00029575	-0.179857	1	0.0772541	0.999932	0.0692312	1
OFUSG06020.2	SKEL1_DROME	-6.91391	0.000607535	0.894644	1	-4.67087	0.413831	-0.641446	1
OFUSG11958.2	SPAST_XENLA	-6.71736	0.00251117	0.30129	1	0.446727	0.999932	-0.541226	1
OFUSG20218.1	CAH7_MOUSE	-6.39261	0.0418911	0.147118	1	-1.98812	0.999932	-0.710011	1
OFUSG20927.2	NA	-6.36445	0.0122661	-1.60292	1	0.438081	0.999932	-2.0071	1
OFUSG23612.1	FMAR_DROME	-6.1582	0.000140423	-0.331885	1	-1.07756	NA	0.268876	1
OFUSG04111.2	BRE4_CAEBR	-5.89814	0.0276474	0.144426	1	0.162537	0.999932	-0.581336	1
OFUSG13957.4	ARRD3_RAT	-5.88632	0.043006	-0.716965	1	-0.928655	0.999932	1.25054	1
OFUSG14306.2	NA	-5.86141	0.0124559	0.311708	1	1.47671	0.999932	-0.173106	1
OFUSG11179.3	COLA1_HUMAN	-5.84264	0.00132015	0.145518	1	0.459401	0.999932	0.712055	1
OFUSG06581.2	SAMC_XENTR	-5.8128	0.0446071	-0.601928	1	1.18942	NA	-0.177085	1
OFUSG16363.1	CRFR2_RAT	-5.77884	0.00122393	-1.26486	0.978635	0.999562	0.999932	-0.0049766	1
OFUSG11447.2	NA	-5.74191	0.00601561	-0.321841	1	1.31989	0.999932	0.437622	1
OFUSG24255.3	SV2B_HUMAN	-5.47052	0.0110308	0.0504214	1	4.56742	0.36264	0.903778	1
OFUSG21450.1	FUCL5_ANGJA	-5.02046	0.00445664	0.202476	1	1.5807	0.999932	0.176269	1
OFUSG26959.3	FLNA_HUMAN	-4.91705	0.00185211	2.10941	0.808206	-0.731357	0.999932	-0.445695	1
OFUSG24904.1	NA	-4.90413	1.62827e-11	-1.46964	0.848987	-0.815577	0.999932	1.21499	0.623946
OFUSG19903.2	GRM2B_PONAB	-4.83289	0.0199665	0.348965	1	0.345156	0.999932	0.0658655	1
OFUSG09479.2	NA	-4.20028	0.043006	0.291615	1	-0.473254	0.999932	-0.361807	1
OFUSG06474.2	GATA2_MOUSE	-3.9209	6.33427e-10	-1.72009	0.0779118	-1.23279	0.696621	-0.630716	1
OFUSG10203.1	NA	-3.91366	4.60807e-05	-0.252259	1	-0.467483	0.999932	-0.686494	1
OFUSG25381.1	MADD_MOUSE	-3.73743	0.0211928	0.0230206	1	-1.45488	0.999932	0.424958	1
OFUSG00915.2	NA	-3.62937	3.15171e-18	0.393877	1	-1.5	0.285268	0.0828627	1
OFUSG09683.1	FOXJ3_HUMAN	-3.47776	1.00141e-10	-1.32114	0.196018	-0.370518	0.999932	-0.790747	1
OFUSG03890.1	DRD1C_XENLA	-3.42326	0.00708834	-0.940082	1	-0.825169	0.999932	0.0542785	1
OFUSG19698.1	NA	-3.28926	0.043006	-1.74663	1	-0.656452	0.999932	0.569269	1
OFUSG18404.2	NA	-3.21888	4.68306e-12	-0.104975	1	-1.79981	0.807758	-0.498128	1
OFUSG00915.3	NA	-3.17401	0.0126394	0.506629	1	-1.30798	0.676698	0.35617	1
OFUSG11114.1	NA	-3.16429	0.0413621	-0.488781	1	-0.298468	0.999932	0.106332	1
OFUSG11535.1	COLL7_MIMIV	-3.10835	0.00044819	-1.27626	0.730215	-0.442982	0.999932	0.779546	1
OFUSG00592.1	ITA11_MOUSE	-3.08376	2.69467e-06	-0.000992238	1	-0.762595	0.999932	0.238396	1
OFUSG02171.2	NA	-3.05611	1.06629e-12	0.734587	0.90358	-0.641511	0.999932	-0.0278161	1
OFUSG18814.1	FEZF2_MOUSE	-3.03721	2.81125e-05	-0.150147	1	-0.748436	0.999932	0.282644	1
OFUSG23458.1	ZMAT3_HUMAN	-2.95114	5.70641e-11	-0.641621	1	-0.748645	0.999932	-0.00581462	1
OFUSG05158.1	APCD1_XENTR	-2.94204	1.93322e-13	-0.980754	0.138745	-0.682967	0.999932	-1.16359	0.616775
OFUSG04097.1	NA	-2.88228	0.00380655	-0.896001	1	-1.10803	0.999932	0.498057	1
OFUSG16598.2	CEL3A_XENLA	-2.84908	9.50537e-05	0.390117	1	-0.408984	0.999932	0.00290994	1
OFUSG00915.1	NA	-2.84721	2.17058e-05	-0.0882589	1	-1.562	0.796824	0.0108243	1
OFUSG18449.3	RFOX1_MOUSE	-2.76937	0.0288254	-1.02493	1	-1.35995	0.999932	-0.412843	1
OFUSG16599.1	CELF4_DANRE	-2.53662	0.00134072	0.250424	1	-0.421998	0.999932	0.0493049	1
OFUSG16269.1	FMAR_DROME	-2.44378	0.027229	-0.758456	0.90358	-1.01321	0.573258	0.211666	1
OFUSG03084.1	FOXL1_MOUSE	-2.42073	0.000140423	-1.23472	0.76555	0.173939	0.999932	0.198028	1
OFUSG19699.1	NA	-2.35412	0.0452245	-0.407954	1	-0.848348	0.999932	-0.878254	1
OFUSG20399.1	NA	-2.32438	0.0164812	-0.30124	1	-0.688892	0.999932	-0.589853	1
OFUSG22723.1	NA	-2.21488	0.0156439	-0.337721	1	-0.0780153	0.999932	-0.315072	1
OFUSG13714.1	PLPP1_HUMAN	-2.18847	1.67448e-06	-0.685147	0.183304	-1.01223	0.999932	0.0179923	1
OFUSG14317.2	CML3_ORYSJ	-2.17829	0.00677125	-0.139696	1	-0.565096	0.999932	-0.0606863	1
OFUSG12223.1	NA	-2.12174	0.0496595	0.174941	1	-0.229971	0.999932	-0.0154782	1
OFUSG03523.1	COLL2_MIMIV	-2.10204	0.0473442	-0.0245359	1	-0.488127	0.999932	-0.912326	0.988916
OFUSG13117.1	RGXT2_ARATH	-2.06819	1.18935e-07	-1.03834	0.155616	-0.634049	0.999932	-0.34749	1
OFUSG25737.1	IKZF5_DANRE	-2.03679	1.28814e-10	0.39494	1	-0.975568	0.999932	0.115852	1
OFUSG02121.1	ST1D1_MOUSE	-2.00989	0.0126394	0.308982	1	-1.03981	0.799855	-0.419018	1
OFUSG17995.1	NA	-1.95555	0.0384234	0.525001	1	-0.12145	0.999932	-0.880272	1
OFUSG22512.1	SCP_PERVT	-1.9331	0.00286846	-0.185017	1	-0.221067	0.999932	-0.459644	1
OFUSG12871.1	TRPA1_DROME	-1.8969	0.0442321	-0.728691	1	0.353001	0.999932	0.161086	1
OFUSG07732.1	COLL7_MIMIV	-1.88306	0.022955	0.412583	1	-0.438243	0.999932	0.0636121	1
OFUSG10089.1	NA	-1.83427	0.00973719	-1.15139	0.406198	-1.09536	0.999932	0.613023	1
OFUSG02755.1	TTPAL_HUMAN	-1.7874	0.0148417	-1.34091	0.125495	-0.239098	0.999932	-0.0573543	1
OFUSG00510.1	SVEP1_RAT	-1.77387	0.0281846	-0.846122	0.901811	-0.47204	0.999932	0.144827	1
OFUSG12490.1	NA	-1.7314	0.0473442	-0.547701	1	-0.978065	0.999932	0.00457589	1
OFUSG19720.1	SAST_RAT	-1.64195	0.00286846	-0.242063	1	-0.926669	0.631345	-0.397857	1
OFUSG01698.1	EVA1C_MOUSE	-1.61747	0.000199961	-0.197133	1	-1.17793	0.468383	-0.166304	1
OFUSG12368.1	SIX3_HUMAN	-1.61666	0.000492995	-0.0212383	1	-1.05156	0.194719	0.108805	1
OFUSG09179.1	CO6A6_HUMAN	-1.61503	0.00020361	-0.481021	1	-0.344072	0.999932	0.621989	0.804681
OFUSG01654.1	NA	-1.57198	0.000196527	-0.640556	0.800975	-0.48416	0.999932	-0.198543	1
OFUSG04539.2	DYST_MOUSE	-1.51913	0.00203196	-0.529305	1	-0.654895	0.999932	0.00522545	1
OFUSG04569.1	PTTG_MOUSE	2.89375	0.0454413	-0.506688	1	1.75017	0.999932	-0.133044	1
OFUSG06037.1	NA	3.41441	0.0491624	0.223312	1	0.0813064	0.999932	-0.172045	1
OFUSG10653.2	NA	4.74293	0.0215522	-0.613152	1	-0.603762	0.999932	-1.37695	0.798646
OFUSG20615.2	NECA1_HUMAN	5.00062	0.0481607	-0.1025	1	-1.1131	0.999932	0.0551544	1
OFUSG06891.5	NRG_DROME	5.28453	0.00769548	0.112319	1	0.975958	0.999932	0.408558	1
OFUSG03848.1	NA	5.46927	0.0487863	1.40721	1	-1.12974	0.999932	-1.43903	1
OFUSG16554.2	DLEC1_HUMAN	5.49995	0.0442321	-0.709567	1	-6.96928	0.53551	-0.514788	1
OFUSG15046.1	TITIN_DROME	5.50894	0.00922047	-1.45863	1	-4.77827	0.774086	-1.44322	1
OFUSG22308.2	NA	5.64782	0.00573032	0.0334324	1	2.10098	NA	0.668019	1
OFUSG16044.1	GSTP1_XENLA	5.70857	0.0420817	0.272129	1	0.135991	0.999932	-0.611109	1
OFUSG01017.2	NA	6.35842	0.00317096	-0.703429	1	-0.950171	0.999932	-0.0900464	1
OFUSG04786.2	CADN_DROME	6.58611	0.000287058	0.289718	1	-5.20593	0.999932	-0.189462	1
OFUSG09960.2	CP4V2_HUMAN	6.78387	0.0473442	0.312613	1	1.38903	0.999932	0.111461	1
OFUSG06726.2	HIL_DROME	7.23028	0.0148417	-1.05416	1	-0.891166	0.999932	0.0115174	1
OFUSG02043.1	NA	13.0106	0.00371501	-1.21121	1	0.0776919	NA	-1.32842	1
OFUSG10091.5	TEKT3_MOUSE	16.1738	0.000199961	0.0355765	1	-0.81638	0.999932	-1.13845	1
OFUSG01567.1	CELF2_XENTR	16.8029	0.000340312	-1.56933	1	0.0767188	NA	-6.16197	0.0614674
OFUSG01467.2	SIF2_DROME	18.3426	3.68362e-07	2.58729	1	-20.5131	NA	-0.258095	NA
OFUSG25837.1	TRIM2_AILME	19.4518	6.90804e-12	0.787691	1	-0.0172104	0.999932	7.63479	0.055356
OFUSG17112.1	OTOF_DANRE	19.6259	3.73121e-07	-0.134278	1	0.0741374	0.999932	-1.68403	1
OFUSG20968.1	PHC3_MOUSE	19.777	5.82283e-16	1.13164	1	0.710624	0.999932	0.504427	1
OFUSG02543.2	FAT1_HUMAN	-23.5562	NA	-22.8361	NA	-22.3348	6.13617e-05	8.06815	0.880643
OFUSG20586.2	BLVRB_BOVIN	-11.7209	0.484182	-1.61408	1	19.4715	0.000102891	0.570944	1
OFUSG12250.1	NA	-8.34863	0.999996	-1.23042	1	18.4825	0.00345628	2.12233	1
OFUSG09310.3	C2CD2_MOUSE	-8.02417	0.685463	0.0826123	1	18.8069	0.00269431	-1.86031	1
OFUSG06632.3	SLIT_DROME	-6.47872	0.999996	8.94786	0.131597	19.4638	0.00147218	-1.05971	1
OFUSG17082.1	GAK_RAT	-5.11265	0.930199	8.15347	0.0107953	NA	NA	NA	NA
OFUSG15937.1	BBS5_MOUSE	-3.74938	0.562215	-0.526141	1	-5.63974	0.00474058	-0.337441	1
OFUSG06676.4	RGS12_MOUSE	-3.24314	0.999996	-1.3609	1	2.01213	0.999932	-22.2197	2.70855e-05
OFUSG22928.1	NA	-3.23417	0.999996	-6.13928	0.022414	0.00222331	NA	-5.87023	0.0849135
OFUSG16472.1	NA	-3.20641	0.339921	-1.41225	0.0230727	-0.0288404	0.999932	-1.28734	0.268672
OFUSG09637.1	ADA1B_MOUSE	-3.00615	0.307693	-1.99145	0.748667	-8.25087	6.14017e-11	-0.187148	1
OFUSG14895.1	CADM4_XENLA	-2.68967	0.999996	-2.6533	0.00787651	-0.974208	0.999932	-1.79324	0.183421
OFUSG23617.3	NA	-2.66588	0.659649	-3.33321	0.000362283	0.783877	0.999932	0.502184	1
OFUSG12229.1	NA	-2.57243	0.999996	-1.21434	0.0491249	-2.37453	0.999932	-0.318604	1
OFUSG17466.2	AP2B_HUMAN	-2.55936	0.858832	-0.921123	1	-3.94635	0.0111604	-0.0827445	1
OFUSG17466.1	AP2B_HUMAN	-2.42338	0.999996	-0.120711	1	-8.45487	6.50584e-05	-0.0639061	1
OFUSG22303.1	CHST5_MOUSE	-2.41385	NA	-3.08844	0.0023053	-0.205732	NA	-2.08054	NA
OFUSG09238.1	NA	-2.25628	0.983584	-2.64684	0.137369	-2.06548	0.0174188	-0.111517	1
OFUSG10173.2	NA	-2.22471	0.999996	0.918362	1	2.3882	0.999932	-20.1075	5.62077e-06
OFUSG16019.1	HEBP2_HUMAN	-2.01666	0.999996	-0.769569	1	0.739176	0.999932	-4.06918	0.000420826
OFUSG17661.2	DLLH_BRAFL	-1.96974	0.113635	-0.376471	1	-2.1381	0.0168412	-1.11655	0.780588
OFUSG17938.1	SM20_SCHMA	-1.86584	0.999996	-4.44805	9.23323e-49	-1.38069	0.999932	-1.67463	0.165074
OFUSG01347.1	IPP_HUMAN	-1.84609	0.999996	-1.64992	0.00569326	-0.297939	0.999932	0.253939	1
OFUSG08218.1	NRARP_XENTR	-1.74266	0.115606	0.0557883	1	-1.89926	0.0388081	-0.0251226	1
OFUSG10148.1	NA	-1.72318	0.999996	0.341719	1	-0.603865	0.999932	1.2522	0.0048257
OFUSG16696.1	TCF15_HUMAN	-1.71601	0.999996	-2.32336	0.000472558	-1.11685	NA	0.0341554	NA
OFUSG09684.1	FOXL1_MOUSE	-1.71252	0.999996	-3.03961	0.00266722	-0.92656	NA	-0.784395	1
OFUSG09116.1	NA	-1.71239	0.0558952	-1.39856	0.190029	-1.56773	0.00926659	0.521696	1
OFUSG06140.1	NA	-1.71075	0.655661	-2.30537	0.00978921	-0.603013	0.999932	-1.41961	0.158123
OFUSG08655.1	NA	-1.67534	0.999996	0.690042	1	-4.75471	0.00313915	-0.358412	0.477706
OFUSG03894.1	NA	-1.65895	0.219108	-1.49233	0.0598626	-1.49871	0.0367035	0.240506	1
OFUSG19746.1	CILP1_MOUSE	-1.63217	0.999996	1.65968	0.0101972	0.42126	0.999932	0.462639	1
OFUSG04900.1	SCRT1_MOUSE	-1.61902	0.0883214	0.543032	1	-3.16219	1.23778e-05	0.348703	1
OFUSG26953.1	FABP1_DORPE	-1.59506	0.999996	-0.105228	1	-0.385779	0.999932	-1.21966	0.0113918
OFUSG06020.1	SKEL1_DROME	-1.54166	NA	-0.311968	NA	-22.7082	3.58358e-09	0.142714	1
OFUSG06379.1	TWK18_CAEEL	-1.50589	0.930199	-2.03152	0.00481007	-0.395451	0.999932	-1.08057	0.254068
OFUSG12111.4	MTA1_HUMAN	-1.46447	0.0345585	-0.267387	1	-0.980637	0.979349	0.0425138	1
OFUSG20914.2	TSN18_MOUSE	-1.44659	0.00167245	-0.118982	1	-0.314917	0.999932	0.127943	1
OFUSG20914.4	TSN18_MOUSE	-1.44659	0.00167245	-0.118982	1	-0.314917	0.999932	0.127943	1
OFUSG05489.1	HMX3_DANRE	-1.43305	0.356069	-1.23695	0.446026	-3.08778	9.49949e-06	-1.09531	0.797357
OFUSG02663.1	PXDN_HUMAN	-1.4033	0.999996	-1.69435	0.75042	0.631653	0.999932	-2.47103	0.00425453
OFUSG01997.1	EPDR2_HALAI	-1.40162	0.999996	1.31597	0.00569326	2.04662	0.999932	-0.5886	1
OFUSG11709.1	MATN1_HUMAN	-1.39797	0.999996	-3.63919	9.76144e-07	-1.8211	0.0580718	0.433564	1
OFUSG23528.3	FOXJ3_HUMAN	-1.39172	0.999996	0.184076	1	-3.49037	0.00190879	-0.0297908	1
OFUSG03915.2	LYPD6_DANRE	-1.38309	0.0441667	0.365132	1	-1.19777	0.51059	0.055916	1
OFUSG18809.1	LFN1L_DANRE	-1.38057	0.00363218	-0.29426	1	-0.54101	0.999932	-0.0838427	1
OFUSG03211.1	HAND2_DANRE	-1.37712	0.999996	-1.45885	0.692813	-3.13151	0.000995492	-0.698446	1
OFUSG00511.1	INS2_CONIM	-1.3605	0.034449	-0.147365	1	-0.288338	0.999932	0.224571	1
OFUSG25366.1	LRIG3_HUMAN	-1.35921	0.00020361	-0.635917	0.378734	-0.302201	0.999932	-0.0113362	1
OFUSG17459.1	DOXA1_HUMAN	-1.33436	0.621035	-2.96996	5.60613e-09	-0.463152	0.999932	-1.25584	1
OFUSG05775.1	NKX32_MOUSE	-1.30206	0.999996	-4.47765	0.000134469	0.0989853	0.999932	-2.0616	0.117021
OFUSG17661.1	DLLH_BRAFL	-1.30021	0.999996	-6.26879	0.00825524	-2.84989	0.999932	-0.0386905	1
OFUSG01141.1	P3F2B_XENLA	-1.28943	0.356069	0.283234	1	-2.92798	1.00183e-08	0.283183	1
OFUSG21378.1	DIRA2_MACFA	-1.27031	0.999996	-3.97625	0.00235303	-0.51284	0.999932	-0.171452	1
OFUSG25600.1	LHX3_XENLA	-1.25316	2.49536e-11	-0.110728	1	-0.590052	0.999932	0.0331594	1
OFUSG19246.1	EGR1A_XENLA	-1.24752	0.999996	-2.3741	7.80079e-05	-0.999293	0.999932	0.124291	1
OFUSG09590.1	PALY_RHOTO	-1.23805	0.999996	-0.0820201	1	-1.89486	0.00328547	-0.510515	1
OFUSG25113.1	PROH4_APIME	-1.23341	0.0766993	-1.31411	0.000387137	-0.448622	0.999932	-0.346913	1
OFUSG15997.1	NA	-1.22581	0.557485	-1.99705	0.000656728	-0.655034	0.999932	-0.101154	1
OFUSG18682.3	ANKR2_HUMAN	-1.21379	1.93165e-05	-0.111699	1	-0.208056	0.999932	0.361963	1
OFUSG01103.1	NOTUM_MOUSE	-1.21238	0.999996	-1.80631	0.0131662	-0.324433	0.999932	-0.760694	1
OFUSG11710.1	MATN1_MOUSE	-1.19517	0.999996	-2.73506	2.19129e-05	-1.45503	0.0550214	0.704459	0.6311
OFUSG09796.1	BNC2_HUMAN	-1.16635	0.0145488	-0.672076	0.232584	-0.871641	0.999932	0.10052	1
OFUSG26458.1	FMAR_DROME	-1.15647	0.999996	-2.79773	0.00321255	-1.25321	0.999932	0.898562	1
OFUSG23442.1	NA	-1.15149	0.0446071	-0.983811	0.0715948	-0.175902	0.999932	0.121781	1
OFUSG05997.1	CUZD1_RAT	-1.13306	0.999996	1.23726	0.000275121	0.300489	0.999932	0.350235	1
OFUSG02715.1	BGBP_PENMO	-1.08838	0.999996	0.31707	1	5.80755	0.000162062	-0.255835	1
OFUSG00638.1	NA	-1.08634	0.518727	-1.45851	2.48065e-05	-0.424294	0.999932	0.0330775	1
OFUSG25447.1	FJX1_XIPMA	-1.06345	6.32664e-06	0.0616674	1	-0.618357	0.999932	0.271503	1
OFUSG04250.1	FUT1_PLEBR	-1.04822	0.999996	-1.21481	0.0437709	-0.470694	0.999932	-0.470854	0.758931
OFUSG13737.1	HS3S5_MOUSE	-1.02797	NA	-2.93223	0.0336442	0.540927	NA	-1.73029	1
OFUSG13199.1	DMTA2_DANRE	-1.02538	0.999996	-1.31837	0.0438229	-0.944832	0.999932	0.0465028	1
OFUSG26600.1	MUA3_CAEEL	-1.00912	0.000942155	-0.198044	1	-0.205964	0.999932	-0.0681297	1
OFUSG02855.1	NA	-0.972963	0.907995	-0.836056	0.0301864	-0.239886	0.999932	-0.224214	1
OFUSG09589.1	PAM_TAXWC	-0.951654	0.999996	-0.0953451	1	-1.90849	0.035287	-0.523185	1
OFUSG10965.1	CHIA_RAT	-0.939527	0.999996	-2.10183	0.00197255	-0.334586	0.999932	0.189149	1
OFUSG08328.2	SFRP5_MOUSE	-0.930531	0.999996	-2.00494	0.00418892	0.173024	0.999932	-0.645149	1
OFUSG16369.2	WDR87_HUMAN	-0.920818	0.999996	-0.265657	1	0.0858836	0.999932	-2.56514	0.00357025
OFUSG05942.1	NA	-0.919118	0.999996	-2.77565	0.00182925	-0.254843	0.999932	0.803112	0.618276
OFUSG09249.1	NA	-0.914392	0.999996	-2.93714	0.0476515	-0.857581	NA	-1.4103	NA
OFUSG10529.1	NA	-0.881581	0.999996	-1.49908	0.027784	1.0951	0.999932	-0.476013	1
OFUSG08626.1	PROA_VIBAL	-0.878225	0.999996	-1.74212	0.01209	-0.532604	0.999932	-1.26184	0.206898
OFUSG07327.1	ARF_MAIZE	-0.839379	0.999996	-1.00215	1	1.51241	0.999932	2.19117	0.00817788
OFUSG23298.1	NA	-0.813511	0.999996	-1.18798	0.833307	-0.209318	0.999932	1.18948	0.00648171
OFUSG06850.1	NAS15_CAEEL	-0.810216	0.999996	-2.92587	0.00769662	-0.688926	0.999932	0.217113	1
OFUSG20715.1	NA	-0.808365	0.449226	-0.122053	1	-0.715563	0.0363738	-0.12724	1
OFUSG17885.1	MTH2_DROYA	-0.807723	0.999996	-3.19944	2.63731e-12	0.326589	0.999932	-0.722952	0.656762
OFUSG02905.1	PHX2B_MOUSE	-0.788865	0.999996	-1.64582	0.0255032	-0.626067	0.999932	-0.442094	1
OFUSG17943.2	SH3L2_DANRE	-0.788245	0.999996	-2.56844	0.000323787	0.386849	0.999932	-0.724005	1
OFUSG20572.1	SCRT1_MOUSE	-0.783809	0.999996	-2.51484	0.000141517	0.0351248	0.999932	-1.23739	0.308952
OFUSG12746.1	NA	-0.777148	0.999996	-2.91011	1.78571e-08	-0.114562	0.999932	-1.48665	0.0608765
OFUSG13341.1	ABDB_DROME	-0.776263	0.999996	-2.33837	0.0012238	0.182522	0.999932	-0.475437	1
OFUSG04713.1	NA	-0.768963	0.999996	-2.27343	0.0468132	-0.591106	0.999932	-1.98224	0.0952338
OFUSG26267.1	HES1B_XENLA	-0.767601	0.685463	0.753078	0.401051	-1.25975	0.000234678	0.192577	1
OFUSG04722.1	TWIST_XENLA	-0.762908	0.999996	-2.21924	4.6751e-07	-0.696264	0.999932	-1.22883	0.4795
OFUSG11008.1	LR74A_RAT	-0.752368	0.382194	-1.05667	6.29764e-05	-0.274837	0.999932	-0.303752	1
OFUSG06082.1	CP7A1_HUMAN	-0.750929	0.999996	-1.47738	0.00353024	-0.590202	0.999932	0.341591	1
OFUSG04236.1	COFA1_HUMAN	-0.743081	0.08861	-0.876785	0.00211706	-0.458351	0.979349	-0.381323	0.79006
OFUSG05838.1	HIUH_MOUSE	-0.728055	0.999996	-1.26943	0.000396707	-0.889016	0.999932	-0.418464	1
OFUSG26851.1	NA	-0.726154	0.999996	-3.92271	4.90373e-05	-1.13303	0.999932	-1.46803	0.498757
OFUSG18871.1	FULI_ACHFU	-0.718974	0.999996	-1.82796	0.01209	0.371855	0.999932	0.0313084	1
OFUSG23875.1	ANPRB_MOUSE	-0.710776	0.999996	-3.93807	3.59573e-05	0.827423	0.999932	0.208933	1
OFUSG11266.3	FOS_TETFL	-0.707647	0.999996	-0.0775814	1	-5.10709	0.0238787	-0.180397	1
OFUSG03206.4	TRPG_DROME	-0.704494	0.999996	0.0909939	1	3.71853	0.0024741	0.212366	1
OFUSG06780.1	CAV3_PIG	-0.692991	0.999996	-1.75364	0.000991887	-0.570962	0.999932	0.575139	1
OFUSG15738.2	NA	-0.679451	0.999996	8.00349	0.99817	20.1008	0.000721894	5.0312	1
OFUSG04458.2	NA	-0.679051	0.999996	-2.43543	1	-1.23152	0.999932	-2.48453	0.0146351
OFUSG17939.1	TNNC_TODPA	-0.678175	0.999996	-3.26227	0.0002456	-0.245743	0.999932	-1.55827	0.475017
OFUSG19713.1	NAS6_CAEEL	-0.678038	0.999996	1.45276	0.000754401	-0.03331	0.999932	0.279248	1
OFUSG07352.1	TEKT3_HUMAN	-0.67786	0.999996	-0.423624	1	6.02598	0.00345178	-0.797927	1
OFUSG04673.2	NA	-0.676712	0.999996	0.182421	1	-5.91503	0.0318122	-0.242069	1
OFUSG13049.1	NA	-0.676278	0.999996	2.14813	0.00375532	-1.5474	0.999932	0.451022	1
OFUSG25251.1	FUCTC_DROME	-0.666651	NA	-6.57589	0.000624484	0.0774553	NA	-4.78596	NA
OFUSG24664.1	EAA1_BOVIN	-0.666023	0.999996	-0.931612	0.017825	-0.0832783	0.999932	-0.786391	0.811672
OFUSG21501.1	RN220_MOUSE	-0.660928	0.00202194	-0.20269	1	-0.840078	0.259051	0.155784	1
OFUSG11087.1	YT66_CAEEL	-0.654174	0.999996	-0.430664	1	-0.709082	0.999932	-6.31915	0.0036244
OFUSG06621.1	HMX3_XENLA	-0.65295	0.949025	-0.29553	1	-1.084	0.00269431	-0.409991	1
OFUSG01648.1	NA	-0.629169	0.999996	-1.46357	0.00367249	0.198956	0.999932	0.272095	1
OFUSG13378.1	NRSN1_MOUSE	-0.621573	0.96037	-0.768145	0.00116922	-0.753066	0.959619	0.00535903	1
OFUSG20971.1	TDC1_CAEEL	-0.610053	0.999996	-2.58333	6.11102e-08	0.267318	0.999932	-0.435127	1
OFUSG15703.1	NPFF2_RAT	-0.609472	0.999996	-1.69276	0.0234202	1.39525	0.999932	0.285304	1
OFUSG00018.1	OD3L2_HUMAN	-0.604009	0.999996	-1.6419	0.0139099	0.0800145	0.999932	-1.12667	0.0827013
OFUSG19671.1	NA	-0.603181	0.999996	-2.40492	6.38914e-08	-0.384613	0.999932	-0.956047	0.347386
OFUSG19826.1	NA	-0.585054	0.000237546	-0.249171	0.789281	-0.118407	0.999932	0.0602861	1
OFUSG07988.1	SPR_DROME	-0.58097	0.999996	-3.22061	3.7901e-05	-0.109938	0.999932	-0.221289	1
OFUSG04865.1	ENTK_HUMAN	-0.580499	0.999996	-1.07132	0.106768	-0.0643858	0.999932	0.973285	0.040492
OFUSG16126.1	NA	-0.570203	0.999996	-2.20766	0.0150073	-0.373306	0.999932	-0.349494	1
OFUSG23228.1	TBR1_MOUSE	-0.566823	0.999996	-2.65136	1.25366e-10	-0.00556109	0.999932	-0.176423	1
OFUSG15996.1	XYN1_ARATH	-0.563585	0.999996	-1.59825	0.0239376	-0.308245	0.999932	0.108164	1
OFUSG03277.1	S47A1_DANRE	-0.562933	0.999996	0.00926235	1	0.219032	0.999932	-2.25181	0.000492395
OFUSG18880.1	SLOU_DROME	-0.554531	0.999996	-3.47362	8.08029e-05	-1.89002	0.999932	-1.71812	0.143495
OFUSG17426.1	ROUGH_DROME	-0.552744	0.999996	-2.5235	9.61204e-07	0.0770112	0.999932	-0.978144	0.758931
OFUSG26355.1	ATG4D_HUMAN	-0.552543	0.00836182	-0.0183989	1	-0.44472	0.999932	0.156527	1
OFUSG20589.1	NA	-0.545905	0.999996	-1.58014	0.0202008	-0.0183788	0.999932	-0.869562	1
OFUSG24283.1	HIL_DROME	-0.545242	0.999996	-1.90452	0.0240346	-0.436575	0.999932	-0.978766	0.967051
OFUSG03548.1	NA	-0.536709	0.999996	-1.84415	7.43599e-06	-0.81924	0.999932	-0.574653	1
OFUSG12379.1	NA	-0.528078	0.0494848	0.132911	1	-0.447991	0.531293	0.0626444	1
OFUSG05830.1	ITIH4_HUMAN	-0.527966	0.999996	-1.90545	0.000699489	-0.600524	0.999932	-0.0277386	1
OFUSG24732.1	CP1A1_PLAFE	-0.518198	0.999996	0.559597	1	1.72892	0.999932	2.32457	0.0463567
OFUSG24312.1	AA2AR_HUMAN	-0.504966	0.999996	-0.364574	1	-0.450362	0.999932	0.968616	0.042653
OFUSG11860.1	FBCDB_XENLA	-0.503632	0.999996	0.150801	1	0.433582	0.999932	3.15788	0.000864046
OFUSG21468.2	UNC9_CAEEL	-0.501736	0.999996	-0.753831	0.0471112	-0.163784	0.999932	-0.801864	0.140742
OFUSG03112.3	GLRA2_HUMAN	-0.49284	0.999996	-6.81637	0.0326834	-0.686006	0.999932	-0.480747	1
OFUSG17188.1	NA	-0.487601	0.999996	-1.84214	0.000167234	-0.105379	0.999932	-0.264879	1
OFUSG06994.1	NA	-0.48668	0.999996	-2.84357	0.00139131	0.977126	0.999932	-1.18811	1
OFUSG19881.1	NA	-0.486639	0.999996	-2.37456	0.000266293	-0.630805	0.999932	-0.986086	0.155608
OFUSG17525.1	NA	-0.457238	0.999996	-1.30728	0.506927	-0.0904003	0.999932	-2.46347	5.34788e-05
OFUSG15479.1	NA	-0.444347	0.999996	-1.41054	0.00738251	-0.690087	0.999932	-0.242495	1
OFUSG04294.1	APC_HUMAN	-0.443431	0.0096332	-0.175384	1	-0.473615	0.283027	-0.0231532	1
OFUSG17093.1	G3ST1_HUMAN	-0.440472	0.999996	-1.0959	0.758302	-0.311826	0.999932	-1.78417	0.0192559
OFUSG13701.4	KYNU_RAT	-0.436154	0.999996	0.189968	1	-3.74501	0.00445347	-1.17359	0.775117
OFUSG10454.2	EFCB1_LOTGI	-0.426354	0.999996	-1.90788	0.16298	-5.91145	0.000409022	-0.481383	1
OFUSG14939.1	ITA8_MOUSE	-0.425688	0.999996	-2.78386	2.24819e-10	-0.314423	0.999932	-0.817943	0.304178
OFUSG18070.1	RN151_BOVIN	-0.409917	0.999996	0.0447771	1	-4.20097	0.0488711	-0.542516	1
OFUSG23166.1	CKLF4_HUMAN	-0.407082	0.999996	-0.619024	1	0.079092	0.999932	-1.97169	7.66511e-05
OFUSG05474.1	NA	-0.396093	0.999996	1.00803	0.0231943	0.0146498	0.999932	0.0721374	1
OFUSG04548.1	ROR1_DROME	-0.391857	0.999996	-1.9778	0.00726048	-0.17053	0.999932	-0.616158	1
OFUSG05260.1	NA	-0.385737	0.999996	-2.15553	0.00870153	-0.0628615	0.999932	-0.350784	1
OFUSG19483.1	SLOU_DROME	-0.379022	0.999996	-0.950897	0.840534	-1.73248	0.0138008	-0.363335	1
OFUSG05952.1	NA	-0.377413	0.999996	-2.38459	0.0175504	2.74807	0.999932	-0.855877	1
OFUSG04281.1	NA	-0.375759	0.999996	-3.1783	4.69227e-05	-0.0400195	0.999932	-2.01312	0.0840592
OFUSG02805.1	ARAP1_MOUSE	-0.375692	0.999996	-3.66549	0.0207578	-0.0700368	0.999932	-1.23847	1
OFUSG13924.1	NA	-0.374435	0.999996	-1.80919	0.00772875	0.444695	0.999932	0.376987	1
OFUSG24696.1	MTH2_DROSI	-0.368714	0.999996	-0.369118	1	0.123001	0.999932	-0.857703	0.0422451
OFUSG10205.1	OPSD_LOLFO	-0.355201	0.999996	-1.05223	0.0446105	0.156311	0.999932	-0.152677	1
OFUSG00388.1	NA	-0.354208	0.999996	-1.29121	0.056316	-0.856808	0.999932	-1.29343	0.0144823
OFUSG18788.1	CAYP1_BOVIN	-0.348893	0.999996	-0.162865	1	-0.309381	0.999932	-1.50734	0.00475356
OFUSG26807.1	TISDA_XENLA	-0.338627	0.999996	-0.353757	1	-0.830244	0.00405012	0.0337427	1
OFUSG17170.1	ETS2B_XENLA	-0.335669	0.999996	-0.80347	2.34194e-06	-0.498214	0.999932	-0.301987	1
OFUSG25923.1	NA	-0.332914	0.999996	-2.92148	0.0718071	0.866207	0.999932	-3.26864	0.00630033
OFUSG08898.1	DIRA2_MACFA	-0.328996	0.999996	-2.43456	0.000238078	-0.28172	0.999932	0.147031	1
OFUSG19094.1	WNT16_BOVIN	-0.32771	0.999996	-2.39731	0.000290513	-0.216691	0.999932	-1.44611	0.70739
OFUSG24731.1	CP1A1_RABIT	-0.323977	0.999996	0.126448	1	1.96627	0.999932	3.83208	0.0043311
OFUSG13484.1	NA	-0.32252	0.999996	-2.58557	9.92068e-06	0.0120506	0.999932	-0.639153	1
OFUSG06689.1	SQASE_ECOLI	-0.318491	0.999996	-0.0631722	1	0.183509	0.999932	-1.09311	0.000602899
OFUSG10025.2	ZCHC7_RAT	-0.316874	0.999996	8.18874	0.0128275	-0.472268	0.999932	-5.39742	0.565294
OFUSG16199.1	NA	-0.311269	0.999996	0.275677	1	-1.00373	0.0034597	-0.456159	1
OFUSG19829.1	NA	-0.309969	0.999996	-3.94622	0.0250163	-1.689	NA	-3.16201	0.296226
OFUSG04353.1	NA	-0.304173	0.999996	-1.37041	1.29233e-08	0.133584	0.999932	0.131753	1
OFUSG23550.1	TRFR_RAT	-0.297658	0.999996	-1.98354	0.0438229	-0.756495	0.999932	-1.45839	0.497486
OFUSG25680.1	NA	-0.29352	0.999996	-2.83285	0.366444	1.16125	NA	-4.39275	0.00228731
OFUSG13305.1	GBX2_XENLA	-0.29073	0.999996	-1.15072	0.85754	-1.52534	0.327929	-2.28068	0.0367406
OFUSG04526.1	CO6A3_HUMAN	-0.285686	0.999996	-1.32091	0.0134085	-0.195969	0.999932	-0.799308	0.704032
OFUSG20720.1	CRVP_LATSE	-0.284434	0.999996	-2.25338	0.00370498	-0.246504	0.999932	-1.72743	0.162733
OFUSG15895.1	TITIN_MOUSE	-0.281742	0.999996	-0.679369	0.196018	-0.323405	0.999932	-0.710147	0.000585354
OFUSG04174.1	GLT13_HUMAN	-0.272378	0.999996	-1.588	0.250765	-0.307055	0.999932	-1.95196	0.000205693
OFUSG13441.1	NA	-0.271372	0.999996	-1.67909	0.00353024	-0.358435	0.999932	-0.112329	1
OFUSG02372.1	NA	-0.266188	0.999996	-1.78587	2.29854e-06	0.0386282	0.999932	-0.872278	0.284445
OFUSG15659.1	MYRIP_DANRE	-0.262959	0.999996	-0.443226	1	-0.252981	0.999932	-1.07536	0.0397388
OFUSG06372.1	NA	-0.262558	0.999996	-2.50269	0.0351564	1.04377	0.999932	-1.41127	0.783004
OFUSG04730.2	NR1AA_DANRE	-0.256024	0.999996	-1.57059	0.0330083	-0.093062	0.999932	-0.641591	0.976349
OFUSG06320.1	NA	-0.255517	0.999996	-1.28022	0.0340443	-0.356459	0.999932	-0.726475	1
OFUSG15342.2	GSTT2_HUMAN	-0.25518	0.999996	7.98346	0.000125803	0.09967	NA	-0.0443268	NA
OFUSG21164.1	NA	-0.251201	0.999996	-1.4309	0.011696	-0.53175	0.999932	-0.433539	1
OFUSG05159.1	RAD_MOUSE	-0.245319	0.999996	-1.46454	0.0413187	-0.761681	0.999932	0.0778278	1
OFUSG14097.1	NA	-0.239139	0.999996	-0.59015	1	-0.241469	0.999932	-1.53945	0.0336155
OFUSG22883.1	NA	-0.236417	0.999996	-0.254298	1	2.05466	0.174717	2.92642	0.000359656
OFUSG16854.1	PIGG_HUMAN	-0.232853	0.999996	-1.14257	1	0.911159	0.999932	21.8723	4.15628e-05
OFUSG21507.1	ADA17_DROME	-0.231981	0.999996	-2.58576	0.00274812	0.259791	NA	-1.9278	0.104416
OFUSG00883.1	NA	-0.226193	0.999996	-2.34872	0.00691072	0.49938	0.999932	0.127639	1
OFUSG20123.1	NA	-0.219753	0.999996	-1.84964	0.0168383	-0.071608	0.999932	-0.818288	1
OFUSG03097.1	HXNY_EMENI	-0.217879	0.999996	0.116284	1	-0.0920703	0.999932	-1.47821	0.00595195
OFUSG11159.2	MYS_ARGIR	-0.210582	0.999996	-2.91931	0.00548395	0.597947	0.999932	-1.30886	0.981568
OFUSG16328.1	NA	-0.203574	0.999996	0.310592	1	0.0711361	0.999932	3.54123	4.6872e-06
OFUSG02684.1	FBX8_MOUSE	-0.201206	0.999996	0.230998	1	1.28077	0.259521	2.10892	7.33935e-05
OFUSG08531.1	NA	-0.200728	0.999996	-0.796076	0.00322001	0.00926432	0.999932	-0.633705	0.758931
OFUSG25979.1	NA	-0.200106	0.999996	-1.45926	0.000454001	-0.212293	0.999932	-0.866712	0.518238
OFUSG26691.2	MET24_XENTR	-0.19561	0.999996	-5.995	1	-0.534567	0.999932	7.0157	0.0485413
OFUSG11740.1	GSC_DROME	-0.195478	0.999996	1.11887	0.830035	-2.40678	3.04747e-05	0.261596	1
OFUSG09248.1	CTRB_GADMO	-0.194465	0.999996	-5.15344	1.80431e-05	-0.109975	NA	-4.71569	NA
OFUSG23557.1	NA	-0.189843	0.999996	-0.249349	1	-0.125966	0.999932	-0.961124	0.0274113
OFUSG13515.1	GRIA3_HUMAN	-0.185613	0.999996	-1.0157	0.00631882	-0.0953955	0.999932	-0.707453	0.0747923
OFUSG22805.1	TPPP3_MOUSE	-0.180377	0.999996	-0.0705905	1	-0.0117669	0.999932	2.194	0.0387195
OFUSG02731.1	NA	-0.180332	0.999996	0.769566	0.0103859	0.117399	0.999932	0.151857	1
OFUSG07047.1	NA	-0.177017	0.999996	-1.11404	0.0254298	-0.18018	0.999932	-0.00922083	1
OFUSG11588.1	EIF3F_HUMAN	-0.168049	0.999996	0.162331	1	-0.377355	0.0187096	0.115778	1
OFUSG12225.1	NX22A_DANRE	-0.163265	0.999996	-1.4482	3.44988e-07	-0.42016	0.806061	-0.507762	0.181128
OFUSG02486.1	VEGFA_VIPAA	-0.163195	0.999996	-1.58932	9.2705e-25	-0.323485	0.999932	-0.215224	1
OFUSG20083.1	NA	-0.162715	0.999996	-0.606502	0.0120044	-0.229777	0.999932	-0.421948	0.626965
OFUSG08524.1	NA	-0.158478	0.999996	-2.34223	0.00541553	0.0251064	0.999932	-0.661255	1
OFUSG18428.1	NA	-0.148848	0.999996	-0.386098	1	-0.118176	0.999932	-1.23589	0.00346587
OFUSG18557.1	PLI2B_ARATH	-0.148094	0.999996	-3.30821	3.63779e-09	-0.40561	0.999932	-1.64205	0.182791
OFUSG25050.1	SGMA_DICDI	-0.144721	0.999996	-1.95915	3.56937e-06	0.0555147	0.999932	-1.29065	0.224507
OFUSG17471.1	NA	-0.143313	0.999996	-1.51386	0.0179708	-0.656162	0.999932	0.177059	1
OFUSG08328.1	SFRP5_MOUSE	-0.142477	0.999996	-0.988091	0.00375532	-0.0146188	0.999932	-0.0597538	1
OFUSG06560.1	NOTO_XENLA	-0.135423	0.999996	-1.20945	0.0290786	-0.993637	0.999932	-0.784239	0.631344
OFUSG19659.1	TTLL1_HUMAN	-0.134827	0.999996	0.232119	1	-0.328443	0.999932	-6.44016	0.0118398
OFUSG10531.1	NA	-0.129589	0.999996	-2.28621	1.48848e-05	0.0728039	0.999932	-0.290994	1
OFUSG04468.1	CO6A6_HUMAN	-0.1243	0.999996	-0.00481117	1	-6.29416	1.3403e-05	-0.229494	1
OFUSG11332.1	NA	-0.119937	0.999996	-2.69045	0.0179708	-0.0392979	0.999932	-1.15368	0.935088
OFUSG19666.1	CHIA_RAT	-0.112359	0.999996	-2.07202	0.0176431	0.0484901	0.999932	-1.43878	0.341068
OFUSG08795.1	BDS1_YEAST	-0.112304	0.999996	0.111848	1	-0.237374	0.999932	-1.24175	0.00050049
OFUSG18672.1	EPHX4_MOUSE	-0.110566	0.999996	8.42758	1.84818e-05	0.156177	0.999932	0.175208	1
OFUSG00408.1	LRC15_MOUSE	-0.108091	0.999996	-0.287485	1	0.736172	0.999932	-2.11894	0.000329123
OFUSG17693.1	COPZ1_BOVIN	-0.107676	0.999996	-0.018231	1	0.767527	0.115692	0.825228	0.0241832
OFUSG16436.1	NA	-0.105917	0.999996	-2.26127	1.23765e-07	0.858252	0.999932	-0.834081	1
OFUSG16118.1	NA	-0.102523	0.999996	0.122073	1	-0.797701	0.000335426	-0.329994	1
OFUSG13097.1	FRRS1_DROME	-0.0998602	0.999996	-0.41567	1	-0.281364	0.999932	-1.13639	0.000829373
OFUSG16947.1	EGFLA_RAT	-0.0950161	0.999996	-1.3442	0.000663589	-0.719395	0.999932	-0.349593	1
OFUSG04862.1	B3GN3_HUMAN	-0.0943269	0.999996	-1.01789	0.0002456	-0.0317591	0.999932	-0.718147	0.106174
OFUSG10155.1	AMPE_MOUSE	-0.0922357	0.999996	0.133575	1	0.50047	0.999932	-0.868608	0.0142914
OFUSG10742.1	NA	-0.0922212	0.999996	-3.88625	2.32623e-05	-0.0180216	NA	-2.09824	0.358933
OFUSG16127.1	HEBP1_XENTR	-0.0918828	0.999996	-2.54499	6.24349e-07	-0.477521	0.999932	-1.15504	1
OFUSG14287.1	NRG_DROME	-0.0900368	0.999996	0.0132823	1	-1.25016	0.999932	1.04687	3.02012e-05
OFUSG26583.1	NA	-0.0870801	0.999996	0.00232557	1	0.0123678	0.999932	0.954034	0.0252556
OFUSG11953.1	CTHB5_CONVC	-0.0870144	0.999996	-1.04652	0.000407528	0.337725	0.999932	-0.327465	1
OFUSG20705.2	VWDE_HUMAN	-0.0870113	0.999996	-1.58659	0.0084895	0.236467	0.999932	-0.175854	1
OFUSG13135.1	SVEP1_HUMAN	-0.0840629	0.999996	-1.57279	0.0336254	-0.228869	0.999932	-1.2296	0.0853506
OFUSG10724.2	NA	-0.0826303	0.999996	-0.326629	1	-0.354103	0.999932	-0.660025	0.0304784
OFUSG20959.1	GRIK3_HUMAN	-0.081303	0.999996	-1.57558	0.00944743	0.719604	0.999932	-0.651617	0.852297
OFUSG04577.1	NA	-0.0790705	0.999996	-1.82179	0.0134008	-0.998953	0.235179	-0.419748	1
OFUSG20445.1	RTXE_DROME	-0.0787123	0.999996	-0.192353	1	0.239792	0.999932	2.2338	0.0424786
OFUSG19031.1	NA	-0.0784143	0.999996	-1.87647	0.00321255	0.177695	0.999932	-1.57144	0.43192
OFUSG09927.1	FANA_CORAP	-0.0696175	0.999996	0.942466	0.0019188	1.03828	0.999932	-0.0911937	1
OFUSG05937.1	FA10_CHICK	-0.0658005	0.999996	-3.384	0.0835761	-0.416033	0.999932	-3.17259	1.2596e-12
OFUSG15395.1	CAH14_HUMAN	-0.0613925	0.999996	0.225907	1	0.309255	0.999932	-1.22821	0.0327025
OFUSG24671.1	NA	-0.0581437	0.999996	-1.09069	0.0328789	-0.332936	0.999932	-0.435084	1
OFUSG09455.1	COPE_CHICK	-0.0570694	0.999996	-0.0407774	1	0.575389	0.465775	0.909559	0.00143373
OFUSG23485.1	NA	-0.0547133	0.999996	-0.940789	0.0240498	0.0288505	0.999932	0.214175	1
OFUSG20013.1	ARI1_DANRE	-0.0489314	0.999996	0.124038	1	-0.052607	0.999932	0.348145	0.0367406
OFUSG06175.1	FLNA_DROME	-0.0487694	0.999996	-0.647637	0.000245844	-0.257678	0.999932	-0.23955	1
OFUSG07929.1	ALX4_BOVIN	-0.0485108	0.999996	-3.72249	5.56607e-05	-0.857316	0.999932	-1.31297	0.333037
OFUSG00130.1	NA	-0.0484292	0.999996	-2.12448	2.26941e-10	0.0324922	0.999932	-0.037612	1
OFUSG02990.1	NA	-0.0474664	0.999996	-1.58021	0.0371515	-0.546397	0.999932	-0.239411	1
OFUSG02228.1	NA	-0.0465598	0.999996	-5.50993	5.97725e-05	0.332261	0.999932	-3.5914	0.143495
OFUSG07359.1	NA	-0.0456644	0.999996	-0.397587	1	1.42511	0.999932	2.2471	0.0272341
OFUSG08661.1	CNN3_HUMAN	-0.0447913	0.999996	-1.98999	9.80502e-25	-0.383661	0.999932	-0.284358	1
OFUSG24763.1	ATPB2_DROME	-0.0445026	0.999996	-0.898291	5.03002e-05	-0.0593031	0.999932	-0.722175	0.151589
OFUSG03235.1	ZMAT2_MOUSE	-0.0436116	0.999996	0.0134243	1	0.0192491	0.999932	0.765582	0.0243081
OFUSG20668.1	NA	-0.0427847	0.999996	-0.583042	1	0.926361	0.999932	-2.76581	0.0177875
OFUSG23361.1	NA	-0.0400501	0.999996	-0.896897	0.00956343	0.552026	0.999932	0.768948	0.825098
OFUSG07802.1	ASPP_AEDAE	-0.0335949	0.999996	0.406651	0.0303213	0.0350418	0.999932	-0.192383	1
OFUSG06166.1	NA	-0.031392	0.999996	-1.62781	0.0134694	-0.211706	0.999932	-0.456291	1
OFUSG03207.1	NA	-0.0283862	0.999996	-0.584701	1	0.0904453	0.999932	-1.35988	0.00562593
OFUSG19275.1	JMJD8_HUMAN	-0.0255137	0.999996	-1.91394	0.157214	0.361035	0.999932	-1.88068	0.00279184
OFUSG08793.1	MET27_HUMAN	-0.0251317	0.999996	-1.63812	0.00110457	-0.00983737	0.999932	0.0127601	1
OFUSG17687.1	RER1_RAT	-0.021085	0.999996	0.154688	1	0.344652	0.999932	0.58773	0.0369767
OFUSG03610.1	LRC24_HUMAN	-0.0146949	0.999996	-0.610557	0.00364224	0.138726	0.999932	-0.567946	0.119793
OFUSG01018.1	NA	-0.0140376	0.999996	-2.83452	0.000440253	0.649964	0.999932	-0.707593	0.897131
OFUSG05748.3	VMAT2_HUMAN	-0.0114241	0.999996	-0.567634	1	4.85379	0.00865124	0.000964697	1
OFUSG06542.1	NA	-0.0114035	0.999996	-2.75984	0.00464078	-0.094043	NA	-2.44215	1
OFUSG11220.1	SC23A_DANRE	-0.00714113	0.999996	-0.0183392	1	-0.000550403	0.999932	0.454741	0.00809869
OFUSG15508.1	NA	-0.00483036	0.999996	-3.49755	0.000246555	0.385061	0.999932	-2.18575	0.164619
OFUSG07015.1	FSIP2_HUMAN	-0.00445078	0.999996	-0.18204	1	-0.36284	0.999932	1.55016	0.0190532
OFUSG23223.1	ERG_MOUSE	0.00105424	0.999996	-1.39248	0.0246969	0.108851	0.999932	-0.640076	0.937373
OFUSG05616.1	ARF4_XENLA	0.00450837	0.999996	-0.0512918	1	0.527073	0.949937	1.27357	3.22128e-06
OFUSG05929.1	SEC13_MOUSE	0.00851233	0.999996	0.0313538	1	-0.0965501	0.999932	0.796986	0.00133523
OFUSG09931.1	SC22B_CHICK	0.0116346	0.999996	0.0450354	1	0.23306	0.999932	1.09262	0.00942141
OFUSG10351.1	CP10_LYMST	0.0120878	0.999996	-1.65841	0.0214325	-0.717226	0.999932	-0.0537631	1
OFUSG04850.1	NA	0.0140513	0.999996	-0.18719	1	0.345618	0.999932	3.93743	2.04994e-07
OFUSG12820.1	ACSF2_RAT	0.017006	0.999996	0.84929	1	-0.271745	0.999932	-6.00421	0.00715669
OFUSG11187.1	GBF1_CRIGR	0.0221701	0.999996	-0.0149984	1	0.0946089	0.999932	0.794024	0.00285044
OFUSG10202.1	PK1L2_MOUSE	0.0232464	0.999996	-2.12917	3.19861e-17	0.108896	0.999932	0.292941	1
OFUSG20819.1	AOC1_PIG	0.0238405	0.999996	-0.681477	1	0.672733	0.999932	1.88073	0.0280686
OFUSG21930.1	RAB4B_DANRE	0.0241381	0.999996	0.0310406	1	0.597488	0.999932	1.28608	0.0369084
OFUSG07021.1	COG5_MOUSE	0.0245421	0.999996	0.260882	1	0.621354	0.021231	0.476107	0.141182
OFUSG16146.1	ARF_DUGJA	0.0270409	0.999996	-0.0906412	1	0.375994	0.999932	1.22733	6.4775e-05
OFUSG12452.1	NEC2_MOUSE	0.0273918	0.999996	-1.31813	2.5122e-08	-0.103673	0.999932	-0.174329	1
OFUSG05992.4	ENTP7_XENTR	0.0304336	0.999996	0.00630463	1	0.0261087	0.999932	0.752486	0.00469483
OFUSG17692.1	SMRC2_HUMAN	0.0314749	0.999996	0.239363	0.0030055	0.111375	0.999932	0.148909	1
OFUSG22333.1	MYO1C_CHICK	0.0324629	0.999996	-1.94829	0.0336254	-0.150168	0.999932	-1.17717	0.300479
OFUSG02663.2	PXDN_HUMAN	0.0327175	0.999996	-1.659	0.000724657	-0.354617	0.999932	-0.559238	1
OFUSG04635.1	CRHBP_SHEEP	0.0387719	0.999996	-2.98807	1.50995e-05	0.173094	0.999932	-0.161608	1
OFUSG23680.1	TM107_RAT	0.0407447	0.999996	0.296675	1	0.209156	0.999932	0.95831	0.000367831
OFUSG01191.1	NA	0.0409888	0.999996	-2.57281	0.00069044	-0.473438	0.999932	-1.77114	0.608638
OFUSG07867.1	GOT1B_HUMAN	0.0420931	0.999996	0.165396	1	0.537912	0.633862	0.804177	0.00942141
OFUSG04332.1	NA	0.0424135	0.999996	0.491161	1	0.799462	0.999932	2.13375	0.00338626
OFUSG19746.2	MUC5A_HUMAN	0.0429396	0.999996	1.66559	1.35966e-08	3.06149	0.999932	0.499393	1
OFUSG16518.1	CHS2_CAEEL	0.0429563	0.999996	-2.33871	8.38919e-06	0.0287613	0.999932	-1.3428	0.0600981
OFUSG07725.1	UD3A2_HUMAN	0.0435153	0.999996	0.617095	0.847793	-0.230601	0.999932	1.13722	0.00689803
OFUSG07827.1	ANTA_HYDVU	0.0487083	0.999996	-0.833902	1	0.000229012	0.999932	-0.947828	0.0498163
OFUSG08572.2	TBC23_XENLA	0.0537031	0.999996	0.00851455	1	-7.48552	0.00176934	0.204861	1
OFUSG09007.2	MRC1_HUMAN	0.0543561	0.999996	-0.0923802	1	-0.336055	0.999932	-2.48877	7.10557e-05
OFUSG10728.1	AMPE_RAT	0.0568457	0.999996	-0.906172	1	0.00134287	0.999932	-1.84146	0.00496423
OFUSG03037.1	NAGAB_CHICK	0.0573926	0.999996	0.320075	0.000330242	0.050214	0.999932	-0.0245098	1
OFUSG13757.1	NA	0.0632062	0.999996	-2.12168	0.0450737	-0.0769396	0.999932	-1.30519	0.73774
OFUSG17641.1	LGSN_HUMAN	0.0645627	0.999996	0.430924	1	0.274009	0.999932	0.593958	0.040492
OFUSG08661.2	CNN3_HUMAN	0.0672937	0.999996	-1.36389	0.000584894	-0.650782	0.999932	0.044557	1
OFUSG25144.1	KCNKG_HUMAN	0.0677093	0.999996	-1.38432	1.45885e-07	0.0696091	0.999932	-0.558566	1
OFUSG07549.1	EPDR1_HALAI	0.0677894	0.999996	0.62562	1	-0.0478147	0.999932	4.00945	5.21268e-13
OFUSG20876.1	NA	0.0689648	0.999996	-1.8348	0.0110836	-0.0746811	0.999932	-0.89876	0.555418
OFUSG16871.1	HMCN1_HUMAN	0.0710559	0.999996	-1.14918	0.00569326	0.0971488	0.999932	0.730623	0.356591
OFUSG18570.1	BGH3_HUMAN	0.0735956	0.999996	-0.0200852	1	0.0311691	0.999932	-1.82224	0.000142503
OFUSG17317.1	ARFRP_BOVIN	0.0758583	0.999996	-0.102776	1	0.264759	0.999932	0.652988	0.0223442
OFUSG19471.1	5H1AA_TAKRU	0.0773917	0.999996	-2.32101	0.00134419	-0.609152	0.999932	0.0219052	1
OFUSG17092.1	XYLA_ARATH	0.0789803	0.999996	0.0830147	1	-0.273724	0.999932	-1.13251	0.0368189
OFUSG08056.1	NAS8_STECR	0.0804579	0.999996	0.0804243	1	0.0419372	0.999932	-1.20839	0.0407951
OFUSG09829.1	NA	0.0811291	0.999996	-1.19009	0.00569326	0.219844	0.999932	-0.783399	0.15784
OFUSG00255.1	Y381_RICFE	0.0814906	0.999996	0.00886698	1	-0.104154	0.999932	2.22197	0.000122585
OFUSG25117.2	TKFC_HUMAN	0.0821072	0.999996	0.160849	1	0.068866	0.999932	-0.774405	0.0291963
OFUSG16172.1	WNT6_MOUSE	0.082897	0.999996	-3.36362	0.0348703	-0.50052	NA	-1.73786	0.0969367
OFUSG07398.1	MOODY_DROPS	0.086661	0.999996	-2.02631	0.0330083	1.31518	0.999932	-0.264963	1
OFUSG16608.1	NA	0.0891038	0.999996	-0.148084	1	-0.0978333	0.999932	-1.20904	0.0498163
OFUSG02226.2	NA	0.0891285	0.999996	-1.82888	1	0.410634	0.999932	22.1643	6.68908e-07
OFUSG13415.1	NA	0.0963874	0.999996	-0.934991	0.211347	0.0240428	0.999932	-1.01766	0.0309418
OFUSG12014.1	TTC13_HUMAN	0.0968372	0.999996	0.172392	1	0.46585	0.999932	1.02254	0.0048257
OFUSG05617.1	SSDH_RAT	0.101473	0.999996	0.00922376	1	0.344139	0.999932	1.3597	0.0335932
OFUSG13204.1	TPR_MOUSE	0.102441	0.999996	0.250414	0.0118108	0.0898193	0.999932	0.190762	1
OFUSG25363.1	DOPO_RAT	0.104725	0.999996	-1.95714	0.000466545	0.397624	0.999932	-1.04302	0.381957
OFUSG16924.1	ACSF2_MACFA	0.10614	0.999996	-0.187949	1	0.158601	0.999932	-1.57348	0.00852124
OFUSG05015.1	FLP_STAAU	0.109243	0.999996	1.31349	0.0282899	0.448365	0.999932	-0.0430249	1
OFUSG04740.1	GLBL2_HUMAN	0.110485	0.999996	0.707725	2.53974e-07	-0.00308901	0.999932	-0.105264	1
OFUSG16473.1	NA	0.111169	0.999996	-1.19306	0.0155642	-0.15831	0.999932	-0.900927	0.30149
OFUSG21901.2	ST1C2_MOUSE	0.112319	0.999996	-2.29468	0.0239383	0.206622	0.999932	0.937485	1
OFUSG01652.1	HINT2_BOVIN	0.11245	0.999996	0.157477	1	-0.0764384	0.999932	0.887981	0.0331968
OFUSG18786.1	IMDH3_DANRE	0.112659	0.999996	-3.37474	0.00014658	0.0438319	0.999932	-0.845725	1
OFUSG10750.1	GFPT2_BOVIN	0.114111	0.999996	-2.38245	0.0233065	-0.133673	0.999932	-1.94539	0.554778
OFUSG11791.2	KTN1_CHICK	0.116467	0.999996	0.21728	1	0.17405	0.999932	0.996123	1.51022e-05
OFUSG16893.1	COPA_HUMAN	0.116803	0.999996	-0.0310666	1	0.828941	0.093007	1.24926	4.7409e-05
OFUSG18367.1	RHOM_DROME	0.116903	0.999996	-1.32641	3.44988e-07	0.253423	0.999932	-0.413052	0.653875
OFUSG08866.1	CHIA_RAT	0.117525	0.999996	-1.40913	0.000342733	0.256225	0.999932	-1.50462	0.0577668
OFUSG12745.1	NA	0.118609	0.999996	-2.15691	0.0183187	0.455722	0.999932	-0.998812	1
OFUSG05355.1	TBB_PARLI	0.121457	0.999996	0.338072	1	0.131142	0.999932	1.80816	0.00020137
OFUSG01265.1	HMCN1_MOUSE	0.124917	0.999996	-0.637407	1	-0.0471097	0.999932	-1.3452	0.00470363
OFUSG00269.1	COPB_CHICK	0.126125	0.999996	-0.0141995	1	0.594796	0.40381	0.808713	0.00983901
OFUSG11955.1	NA	0.130563	0.999996	-0.512614	1	-0.921637	0.024795	-0.290415	1
OFUSG24131.2	CAH4_RABIT	0.135433	0.999996	-5.90861	7.90899e-07	-1.65545	0.999932	-3.35253	0.0732127
OFUSG26333.1	TUTLA_HUMAN	0.13569	0.999996	-1.80309	3.23767e-05	-0.510517	0.999932	0.455588	1
OFUSG07657.2	ZER1_DROME	0.141279	0.999996	-0.292863	1	0.0771034	0.999932	-8.24304	2.63903e-07
OFUSG04673.1	NA	0.141399	0.999996	0.4722	1	5.85541	0.000129113	0.268937	1
OFUSG07507.1	NA	0.145331	0.999996	0.821366	0.0393672	0.458068	0.999932	-0.0976813	1
OFUSG18054.1	USO1_HUMAN	0.149845	0.999996	0.0986337	1	0.453163	0.514796	0.580634	0.0413185
OFUSG06452.1	APX1_HYDVD	0.150769	0.999996	1.59864	3.12423e-06	0.224687	0.999932	-0.179027	1
OFUSG11876.1	ZN391_HUMAN	0.151697	0.999996	0.199996	1	0.16355	0.999932	2.1016	0.00665397
OFUSG24660.1	GMDH_GLUOX	0.156386	0.999996	-0.0697622	1	0.0772713	0.999932	-0.83477	0.0141075
OFUSG16522.1	CO6A6_HUMAN	0.157671	0.999996	0.548615	0.00140886	0.193224	0.999932	0.204107	1
OFUSG04003.1	ANK3_HUMAN	0.157852	0.999996	-4.81672	2.4301e-05	0.149661	0.999932	0.466884	1
OFUSG19520.1	ST1B1_HUMAN	0.158281	0.999996	-0.278826	1	0.12256	0.999932	-1.00766	0.00514379
OFUSG00836.1	ITA5_XENLA	0.160465	0.999996	-1.10723	0.0301864	0.13057	0.999932	-0.142138	1
OFUSG17637.1	NA	0.161744	0.999996	0.705734	0.0179752	-0.145246	0.999932	-0.0988003	1
OFUSG01743.1	TRY1_XENLA	0.162658	0.999996	-0.922107	0.00489951	-0.00188115	0.999932	-0.136168	1
OFUSG16869.1	ORCT_DROME	0.162788	0.999996	-1.13252	0.0127455	-0.0994536	0.999932	0.430349	1
OFUSG09525.1	NA	0.164016	0.999996	-1.59636	9.5753e-05	-0.0508081	0.999932	-0.821343	0.453475
OFUSG23207.2	DEN11_MOUSE	0.165662	0.999996	-1.28388	1	-0.445704	0.999932	6.39159	0.0267059
OFUSG07324.1	TNI3K_MOUSE	0.166324	0.999996	-0.0547693	1	0.210968	0.999932	1.73042	0.000164249
OFUSG08143.2	CALM4_MOUSE	0.167758	0.999996	-3.27221	1.46572e-12	0.210966	0.999932	-0.948906	0.8582
OFUSG26334.1	CA158_MOUSE	0.168684	0.999996	-1.1287	0.00964372	0.210037	0.999932	0.262752	1
OFUSG13531.1	NA	0.175303	0.999996	-0.139665	1	-0.248881	0.999932	-0.934934	0.0307023
OFUSG07570.1	CP1A1_ORYLA	0.17754	0.999996	0.741776	0.306186	-0.187969	0.999932	1.771	1.43925e-05
OFUSG13574.1	NA	0.177616	0.999996	-1.45815	1	3.05762	0.999932	6.2865	0.0102607
OFUSG03511.1	MMP17_HUMAN	0.181608	0.999996	-1.76557	0.00573359	-0.0891475	0.999932	-0.172622	1
OFUSG11068.1	MMP12_RABIT	0.181764	0.999996	-2.94293	6.30144e-18	0.224994	0.999932	-0.149672	1
OFUSG08010.1	TNNT_DROME	0.182922	0.999996	-5.36493	0.00161296	1.16414	0.999932	-1.98774	0.0747778
OFUSG06788.1	TSN33_MOUSE	0.192653	0.999996	-1.56208	0.000504458	-0.163013	0.999932	-0.957963	1
OFUSG19656.1	RASA1_HUMAN	0.192974	0.999996	-0.0964237	1	0.494349	0.0290374	0.318537	0.463162
OFUSG20467.1	SMYD5_XENLA	0.193419	0.999996	-1.40831	0.0780767	0.204429	0.999932	-1.21297	0.0124044
OFUSG22021.1	CNRP1_BOVIN	0.200628	0.999996	-0.352765	1	0.0507908	0.999932	-2.24936	0.000427368
OFUSG04905.1	NA	0.202028	0.999996	-5.66854	0.0706825	2.0457	NA	-3.92062	0.0344558
OFUSG16372.1	TC1DB_XENLA	0.203296	0.999996	-0.259277	1	-0.256127	0.999932	-0.99772	0.0219386
OFUSG17654.2	KARG_LIOJA	0.207758	0.999996	-4.15996	0.000387137	-0.379078	0.999932	-2.4245	0.591688
OFUSG24445.4	MEG10_HUMAN	0.209132	0.999996	-7.49259	2.89231e-07	0.355438	0.999932	0.640531	1
OFUSG11805.1	NCB5R_LACBS	0.210079	0.999996	0.0985503	1	0.308367	0.999932	-0.935476	1.60171e-06
OFUSG07077.2	WDR46_HUMAN	0.214829	0.999996	0.0722435	1	0.27044	0.999932	0.642408	0.0112967
OFUSG14499.1	FMO5_MOUSE	0.215425	0.999996	0.239523	1	0.306403	0.999932	-0.984202	0.00250484
OFUSG16474.2	NA	0.221693	0.999996	-1.41277	0.140674	1.27985	0.954801	-1.75882	0.0249445
OFUSG03144.1	PRY1_YEAST	0.224749	0.999996	2.58588	0.000455693	-0.302697	0.999932	0.172565	1
OFUSG08192.1	NA	0.226011	0.999996	-2.69911	1.63683e-07	0.402342	0.999932	0.250435	1
OFUSG20178.1	RRP1B_HUMAN	0.232411	0.999996	-0.0244579	1	0.456527	0.0104499	-0.0119571	1
OFUSG17600.1	SODC_HALRO	0.233795	0.999996	-1.35085	0.140476	-0.501675	0.999932	-1.92171	0.00159042
OFUSG16612.1	CATL_SARPE	0.235999	0.999996	0.185638	1	0.0401635	0.999932	-1.90572	0.00223009
OFUSG25359.1	TRIM2_BOVIN	0.23884	0.999996	-3.38681	0.0131701	-1.00964	0.999932	-0.294384	1
OFUSG16872.1	TRM11_MOUSE	0.241836	0.999996	-0.224367	1	0.495251	0.944096	0.7937	0.0158052
OFUSG07581.1	NA	0.243071	0.999996	-0.151788	1	-0.557288	0.999932	-0.901694	0.0206741
OFUSG19406.1	SSUH2_DANRE	0.245958	0.999996	-0.580455	0.468641	0.0251751	0.999932	-0.869933	0.00259832
OFUSG10524.1	NMDE2_MOUSE	0.255218	0.999996	-1.48679	2.94035e-06	0.0862819	0.999932	-0.508145	0.834203
OFUSG18715.1	TBX5A_DANRE	0.257832	0.999996	-2.59786	3.24704e-13	0.0109707	0.999932	0.47853	1
OFUSG01403.1	GLIK_ASPFU	0.261106	0.999996	0.822295	0.0179752	0.156556	0.999932	0.169121	1
OFUSG21675.2	NA	0.265006	0.999996	-0.554052	0.00622738	0.422208	0.999932	-0.128118	1
OFUSG02685.1	CEP44_XENLA	0.268133	0.999996	0.193574	1	0.160578	0.999932	1.73295	2.50765e-05
OFUSG22911.1	GLMN_HUMAN	0.268899	0.999996	0.288161	1	0.612895	0.0295451	-0.024124	1
OFUSG21297.1	XYLB_MOUSE	0.269832	0.999996	-0.0934233	1	0.237427	0.999932	-1.03389	0.00220073
OFUSG16169.1	NSF_HUMAN	0.274871	0.999996	-0.144329	1	0.536687	0.999932	1.29929	0.00193053
OFUSG03923.1	NA	0.277081	0.999996	-1.87562	0.0381109	-1.15525	0.999932	0.124441	1
OFUSG07724.1	TYPX_TRYBB	0.277651	0.999996	0.706572	1	0.207211	0.999932	1.39917	0.000520123
OFUSG13418.1	EAAT_ONCVO	0.283287	0.999996	-0.997512	1	-0.146796	0.999932	-1.87862	0.00289932
OFUSG08856.1	PCFT_DANRE	0.284702	0.999996	-0.691979	1	0.376014	0.999932	-2.10975	0.00689361
OFUSG22764.1	UN93A_XENLA	0.287835	0.999996	-2.2145	0.00292978	-1.86147	0.999932	-1.5055	0.283278
OFUSG09737.1	CTC1_HUMAN	0.288212	0.999996	0.183849	1	0.363319	0.999932	0.904056	0.00595195
OFUSG25031.1	BHMT1_MOUSE	0.288232	0.999996	0.120496	1	0.163846	0.999932	-1.38459	0.0036244
OFUSG01325.1	UNC9_CAEEL	0.292855	0.999996	-1.36779	0.000125803	-0.516126	0.999932	-0.245059	1
OFUSG00087.1	PLMT_YEAST	0.30088	0.999996	-0.101342	1	0.0538843	0.999932	-1.61732	0.0307023
OFUSG04239.1	YNGK_BACSU	0.306298	0.999996	1.20609	0.0393672	-0.482016	0.999932	0.155987	1
OFUSG16270.1	CHS2_CAEEL	0.310908	0.999996	-2.38899	0.000265921	0.413321	0.999932	-1.8845	0.103368
OFUSG23809.1	GUCD1_MOUSE	0.31229	0.999996	-0.251737	1	-0.412462	0.999932	-6.13912	0.00438683
OFUSG05505.1	KCP_XENLA	0.314254	0.999996	0.864759	0.00103291	0.0893188	0.999932	-0.23492	1
OFUSG07388.1	BET1_HUMAN	0.31974	0.999996	-0.204964	1	0.833784	0.210931	1.14665	0.00220209
OFUSG21530.1	CS054_DANRE	0.32522	0.999996	0.0966638	1	0.358084	0.999932	1.85676	0.00357025
OFUSG00144.1	NA	0.329075	0.999996	-2.90451	3.07015e-05	-0.503452	0.999932	-2.02344	0.0751591
OFUSG08624.3	NA	0.329933	0.999996	0.290933	1	5.2211	0.00148579	-0.258205	1
OFUSG15689.1	PLBL2_HUMAN	0.338274	0.999996	-0.0728959	1	0.298291	0.999932	1.3619	0.00441753
OFUSG06195.3	WNK1_RAT	0.350962	0.999996	-2.47263	1	0.536468	0.999932	-7.33924	0.0115052
OFUSG23199.1	GAPR1_HUMAN	0.364531	0.999996	-1.86437	0.000832662	0.239456	0.999932	-0.116944	1
OFUSG15882.5	NOSTN_HUMAN	0.370517	0.999996	-0.508868	1	-6.32965	0.00219466	-0.222699	1
OFUSG09248.2	NA	0.374883	0.999996	-4.39712	0.00473759	1.01089	NA	-2.81798	0.403905
OFUSG25595.1	PE1_ANOGA	0.375906	0.999996	-4.27289	5.00367e-06	0.037055	0.999932	-2.10402	0.118772
OFUSG11337.1	CHAC1_DANRE	0.388046	0.999996	-0.837231	0.0330083	0.445908	0.999932	-0.0235142	1
OFUSG25694.1	SO4A1_MOUSE	0.394705	0.999996	-0.548286	1	0.422208	0.999932	-1.28748	0.00220073
OFUSG10651.1	NA	0.397047	0.999996	-1.84586	0.0112662	0.163719	0.999932	-1.68432	0.14039
OFUSG26380.1	PLCE_HUMAN	0.398574	0.999996	0.102519	1	0.261323	0.999932	1.02466	0.0177905
OFUSG24480.1	CATL_DROME	0.401131	0.999996	0.120487	1	-0.695068	0.999932	-2.30041	1.90968e-05
OFUSG01609.1	NA	0.406214	0.999996	-0.0309492	1	-0.32235	NA	-6.01144	0.00537285
OFUSG07812.1	PKHF2_HUMAN	0.442986	0.999996	-1.3475	0.0290786	0.129491	0.999932	-0.0502973	1
OFUSG09718.1	LRRK1_HUMAN	0.461056	0.999996	-1.52394	1	-0.534482	0.999932	-22.3274	8.41611e-07
OFUSG01468.1	GRM5_HUMAN	0.467772	0.999996	-1.41732	0.0143926	0.575408	0.999932	0.153697	1
OFUSG17520.1	VWDE_HUMAN	0.469788	0.999996	-1.21673	0.118489	0.128069	0.999932	-1.93398	0.000835449
OFUSG20231.1	MEGL_FUSNP	0.479188	0.999996	0.663321	1	-0.949401	0.999932	-1.43964	0.0266469
OFUSG18649.1	KLH20_CHICK	0.480055	0.999996	0.130811	1	0.929136	0.0447264	0.0715423	1
OFUSG18116.1	SIFAR_DROME	0.491887	0.999996	-1.10271	0.00624187	-0.0850874	0.999932	-0.462271	1
OFUSG24137.1	NA	0.494735	0.999996	0.94233	0.00768469	0.205337	0.999932	-0.0327749	1
OFUSG20121.2	K0825_HUMAN	0.494927	0.999996	-2.23504	0.00137437	-0.0636443	0.999932	-1.41683	0.192242
OFUSG23191.2	CYB5_DROME	0.502931	0.999996	-0.0463891	1	-0.28256	0.999932	7.10341	0.000417194
OFUSG21024.1	ARD1_UROFA	0.507818	0.999996	-0.399143	1	2.53638	0.676698	-1.56173	0.0135778
OFUSG19267.2	CAV1_TAKRU	0.508176	0.999996	-3.18714	2.13084e-05	-0.62255	0.999932	-1.62769	1
OFUSG21814.1	LR74A_RAT	0.515194	0.999996	-1.58431	0.00527704	0.518201	0.999932	-1.14801	0.320352
OFUSG21218.3	ZFP92_HUMAN	0.517442	0.999996	6.64818	0.0282899	1.05614	0.999932	3.16156	1
OFUSG12451.1	NA	0.521619	0.999996	1.04587	0.000643609	0.00257741	0.999932	-0.0812838	1
OFUSG00929.1	YMX7_YEAST	0.523148	0.999996	0.409872	1	0.0608853	0.999932	1.88005	0.000373004
OFUSG15163.1	LPH_RABIT	0.535598	0.999996	-1.83515	0.407563	0.3768	0.999932	-2.95266	0.000419752
OFUSG03317.2	GIGA6_CRAGI	0.542597	0.999996	-0.143538	1	0.153395	0.999932	-1.02949	0.0334556
OFUSG07250.1	NA	0.547125	0.999996	-0.586213	1	0.115046	0.999932	-1.61365	0.0479906
OFUSG00178.1	CP3AB_MOUSE	0.549896	0.999996	0.537236	1	0.246083	0.999932	1.9986	0.000225636
OFUSG21596.1	SIX4_HUMAN	0.559961	0.999996	-1.88331	0.000278464	-1.20758	0.729262	-0.652774	1
OFUSG17597.1	INHBB_BOVIN	0.56456	0.999996	1.49725	5.00661e-07	0.892396	0.999932	0.093947	1
OFUSG05649.1	HBX4_DICDI	0.565637	0.999996	-0.924783	1	0.0530589	0.999932	5.23936	0.00807262
OFUSG03470.1	OPSX_HUMAN	0.565761	0.999996	-2.83422	0.0046433	0.00573564	0.999932	0.575293	1
OFUSG04918.1	TBX20_CHICK	0.578396	0.999996	-1.78888	0.0170985	-0.47544	0.999932	-1.3665	0.192242
OFUSG16020.1	HEBP2_HUMAN	0.588932	0.999996	-1.32431	1	0.326808	0.999932	-2.93208	0.0400911
OFUSG16345.1	CO6A6_HUMAN	0.599775	0.999996	1.26853	0.0046433	0.137759	0.999932	0.258041	1
OFUSG07798.1	CSRP1_COTJA	0.609889	0.999996	-1.3425	0.0364367	0.53648	0.999932	-0.521431	1
OFUSG15012.1	YCGJ_BACSU	0.611776	0.999996	1.03919	0.00464078	2.02118	0.999932	0.00225743	1
OFUSG13386.1	NA	0.627634	0.999996	-3.02678	2.65223e-13	1.68235	0.999932	0.357635	1
OFUSG19254.2	TEP1_HUMAN	0.642917	0.999996	-0.649169	1	-1.37087	0.999932	-5.61612	0.0267059
OFUSG09642.1	FOXB1_XENLA	0.652539	0.999996	2.16924	7.38905e-07	0.397369	0.999932	0.788043	0.967051
OFUSG11238.1	PAX9_LEORO	0.654634	0.999996	-20.0154	0.000245049	-1.27286	NA	0	NA
OFUSG23218.1	TMM64_MOUSE	0.660621	0.999996	-0.165805	1	0.511805	0.999932	1.08647	0.0259299
OFUSG16018.1	HEBP2_HUMAN	0.665494	0.999996	-1.12142	0.966738	0.207678	0.999932	-2.87389	3.32208e-07
OFUSG25691.1	NA	0.667711	0.999996	-2.12656	0.00920925	-0.0122828	0.999932	-0.0775673	1
OFUSG25442.1	S4A4_RABIT	0.670067	0.999996	-0.415393	1	0.147929	0.999932	-1.50843	0.00831752
OFUSG10661.1	GRIN2_CHICK	0.672424	0.999996	-0.100137	1	2.58203	0.0329202	-0.0711336	1
OFUSG05383.1	TC1DB_XENLA	0.6779	0.999996	-0.899932	1	-1.10652	NA	-2.66947	0.0292355
OFUSG01435.1	NA	0.678951	0.999996	-1.44224	0.0455798	-0.710461	0.999932	-0.438324	1
OFUSG26096.1	EST5A_CANLF	0.679404	0.999996	0.197467	1	-0.187906	0.999932	-1.44302	0.0109031
OFUSG17847.1	DOK7_MOUSE	0.680065	0.0436869	-0.0246104	1	0.377853	0.999932	-0.188189	1
OFUSG25392.1	NA	0.707732	0.999996	-2.79825	0.00698241	-0.144522	NA	-2.30366	0.620587
OFUSG16649.3	PL8L1_MOUSE	0.726776	0.999996	-2.33693	0.000736153	-0.420803	0.999932	-1.82373	0.173105
OFUSG05473.1	NA	0.730849	0.999996	-0.981178	0.0143926	0.220846	0.999932	-0.086238	1
OFUSG24734.1	CP1A1_ORYLA	0.731243	0.999996	0.567137	1	0.751312	0.999932	2.7621	3.15848e-06
OFUSG25250.1	B4GT6_MOUSE	0.747999	0.999996	-3.2001	0.792723	-2.25763	0.999932	-6.12833	5.12624e-05
OFUSG14487.1	ZNF99_HUMAN	0.754279	0.999996	0.152326	1	0.665908	0.999932	-6.15597	0.00595195
OFUSG08729.1	ASL1_SCHPO	0.818033	0.999996	-0.0620066	1	6.63673	0.00322937	0.536725	1
OFUSG00680.1	VWDE_HUMAN	0.846707	0.999996	-0.465817	1	0.135377	0.999932	-1.0938	0.0326842
OFUSG03359.1	NA	0.84778	0.999996	-1.83353	0.0428103	-1.01903	0.999932	-1.14604	0.720714
OFUSG13010.1	PRSS8_RAT	0.852929	0.999996	-3.98899	3.75105e-05	0.150082	0.999932	-0.889498	1
OFUSG00741.1	NA	0.86509	0.999996	-2.53431	1.45885e-07	0.702422	0.999932	-1.32209	0.297791
OFUSG07866.3	SPDEF_MOUSE	0.878716	0.999996	-0.639272	1	-6.07771	0.00313915	-0.257037	1
OFUSG11563.2	IFIH1_HUMAN	0.906238	0.999996	0.816886	1	-6.44554	0.00435811	-0.795635	1
OFUSG26371.1	GCM_DROME	0.906935	0.0491624	0.442323	1	0.347228	0.999932	0.352356	1
OFUSG10235.1	NA	0.928234	NA	-2.67534	0.0488001	-0.0870014	NA	0.0567662	1
OFUSG23658.1	PCR3_ARATH	0.935187	0.999996	-0.653461	1	-0.0756996	0.999932	-1.35979	1.72e-06
OFUSG13750.1	EST2C_MOUSE	0.954939	0.999996	0.910957	0.00427118	-0.260274	0.999932	0.351516	1
OFUSG11159.4	MYS_ARGIR	0.984306	0.999996	-3.35641	0.0105341	0.727873	0.999932	-1.56778	0.881897
OFUSG07660.1	AWH_DROME	0.99756	0.307169	-1.5293	0.00181026	0.970537	0.999932	-0.644053	1
OFUSG25082.1	TF2AA_DROME	1.0001	0.999996	-5.40268	0.0156223	-0.296901	NA	5.20217	0.972053
OFUSG24558.2	CTRA_BOVIN	1.0106	0.999996	1.2359	0.0348703	-0.609038	0.999932	-0.197948	1
OFUSG19725.1	CD109_HUMAN	1.02915	0.809047	-0.0719076	1	0.125546	0.999932	-1.28417	0.0418664
OFUSG06023.1	DIRA_CAEEL	1.05285	0.999996	-4.00395	0.000338568	-1.30325	0.999932	-0.100331	1
OFUSG24735.1	CP1A1_CHEAU	1.08015	0.999996	0.712683	0.793027	-0.202856	0.999932	2.67594	6.99997e-08
OFUSG24735.2	CP1A1_CHEAU	1.08015	0.999996	0.712683	0.793027	-0.202856	0.999932	2.67594	6.99997e-08
OFUSG01382.1	NA	1.11402	0.999996	-1.61957	0.239783	0.122009	0.999932	-1.5561	0.011124
OFUSG18134.4	NRG2_HUMAN	1.17813	0.999996	-0.579433	1	-3.34073	0.00061746	-0.214667	1
OFUSG03636.1	NA	1.19419	0.999996	0.486234	1	0.0609431	0.999932	-0.985171	0.0198762
OFUSG06011.2	ANR28_MOUSE	1.20672	0.999996	0.107077	1	-2.68787	0.00432836	-0.309055	1
OFUSG15304.1	MMP16_MOUSE	1.21352	0.999996	-2.19605	0.00920992	0.421251	0.999932	0.116367	1
OFUSG01405.2	MDR1_CRIGR	1.22194	0.999996	0.317705	1	-7.33537	0.0376741	0.353274	1
OFUSG17277.2	DLL4_RAT	1.25584	0.999996	6.04371	0.0117185	1.0142	NA	0.607278	1
OFUSG07100.2	NETR_SAGLB	1.30725	0.999996	-0.118929	1	6.50011	0.00637821	0.0414377	1
OFUSG08007.2	TNNI_CHLNI	1.32584	0.999996	-3.08546	3.76878e-13	-1.41517	0.999932	-2.44686	0.0959865
OFUSG04429.1	NA	1.33334	0.999996	-3.48258	4.31716e-05	1.10151	0.999932	-1.24419	0.132377
OFUSG17938.2	SM20_SCHMA	1.3545	0.999996	-2.1071	3.54475e-12	1.46602	0.999932	-0.347466	1
OFUSG16161.1	NA	1.38403	0.999996	-0.131868	1	-5.43742	0.00747024	-0.143724	1
OFUSG04768.1	FOXF1_HUMAN	1.4448	0.999996	-2.09776	0.000314268	0.238702	0.999932	-0.935903	1
OFUSG26073.1	FKH2_YEAST	1.45709	0.999996	0.300639	1	-0.531816	0.999932	6.22113	0.0428054
OFUSG23838.1	NA	1.50333	NA	5.21104	0.0274079	0.316546	NA	3.10558	NA
OFUSG18785.1	IMDH1_XENTR	1.57744	0.999996	-0.0993514	1	7.14218	3.52175e-06	-1.2344	0.92655
OFUSG07033.2	PIGV_MOUSE	1.64738	0.999996	-1.04047	1	17.9233	0.00558821	0.492726	1
OFUSG13574.3	NA	2.01247	0.999996	-3.07971	0.990171	-6.4729	0.0035927	-1.09559	1
OFUSG19800.1	PDE9A_MOUSE	2.57208	0.999996	-1.97661	1.77521e-05	0.0933584	0.999932	-0.667973	1
OFUSG13306.1	LPIN2_HUMAN	3.06713	0.999996	-22.4664	1.42753e-05	1.27693	NA	-0.352673	NA
OFUSG13755.1	WNT4_HUMAN	3.55436	0.999996	-7.90061	0.0215786	-1.99781	NA	-6.22224	1
OFUSG06649.1	PLXA2_MOUSE	5.2669	0.252096	1.67159	1	-6.77211	0.035885	0.0159981	1
OFUSG24224.1	CLIP2_MOUSE	5.81691	0.279377	8.23501	0.00256558	0.0764258	NA	-0.572747	1
OFUSG04163.2	RHG21_MOUSE	6.22093	0.999996	6.60388	0.901811	-22.3851	2.6918e-09	-0.715054	1
OFUSG03580.2	LIGO2_HUMAN	7.33848	0.999996	0.265372	1	-0.366316	0.999932	22.1473	6.39198e-06
OFUSG12993.4	CLAP1_XENTR	19.9712	NA	37.9354	NA	-1.36433	0.999932	-23.1237	8.80641e-06
