# Supplementary material for: ERK1/2 is an ancestral organising signal in spiral cleavage
Source: Research Square preprint supplement (doi:10.21203/rs.3.rs-793154/v1), 2021-08-23
Supplement: Supplementary file 8 [file d47cb3165e85db7311b4776a.docx]

**Multiple Protein Alignments**

==== FoxH ====

>Capitella_tellata_FoxH1/1-112

--------MV-AAAIWSSDRK-CLTTAEIFTQ-LRSLFVFFGS-AYTGWESSVR-HTLSVYPCFIHSQSSRW

KVW-SVDLSLVP---ETAFVAQSKK-Q--

>Crassostrea_gigas_FoxHa/193-324

KPPYPYTGMI-IHAINSTTEK-SLTLTGIISK-LKEMFTFFKG-SYTGWRDSVR-HNLSHNACFVKGGRSNG

NLW-HVDISKAP---INCFKLQDTP-VAR

>Danio_rerio_FoxH1/90-214

KPPYSYLAMI-AMVIQNSPEK-KLTLSEILKE-ISTLFPFFKG-NYKGWRDSVR-HNLSSYDCFVKVLKGKG

NFW-TVEVNRIP---LELLKRQNTA-VSR

>Homo_sapiens_FoxH1/26-153

KPPYTYLAMI-ALVIQAAPSR-RLKLAQIIRQ-VQAVFPFFRE-DYEGWKDSIR-HNLSSNRCFRKVPKAKG

NFW-AVDVSLIP---AEALRLQNTA-LCR

>Mus_muculus_FoxH1/57-184

KPPYTYLAMI-ALVIQAAPFR-RLKLAQIIRQ-VQAVFPFFRD-DYEGWKDSIR-HNLSSNRCFHKVPKAKG

NFW-AVDVSLIP---AEALRLQNTA-LCR

>Owenia_fusiformis_FoxH1/21-146

KPPYSYLGLM-VTAIYNSPDQ-QLSLSDICRT-LENMFPFFKQ-EYRGWKDSVR-HNLSHNTCFVKRLKKKG

NFW-AVDLDKVP---HDAFKRQDTS-VAR

>Halicryptus_spinulosus_FoxH1/113-240

KPPYSYLGLM-VMAIQASPDR-RLTLSGIHRA-LERMFSFFTS-NYSGWKDSVR-HNLSLNNCFVKLLKAKG

NFW-TVDISKVP---LDSFKRQDTK-ESR

>Priapulus_caudatus_FoxH1/209-338

KPPFSYLGLM-VTAIQSSPSG-KLTLSGIHRA-LENMFPFFKC-EYSGWKDSVR-HNLSLNKCFVKVLKGKG

NHW-TVNINNVP---LDAFKRQDTK-ESR

>Patinopecten/23-143 yessoensis_FoxHa

KPPYSYAGMI-IVAIMTSPNK-MLSLSEIHDY-LRNMFDFFKQ-PYLGWKDSVR-HNLSHCKCFVKGGKGRN

NLW-TVNMAEVT---PSLFRRQQTA-IAK

>Patinopecten/36-157 yessoensis_FoxHb

KPPYTYLGLA-VMSIELSSNK-ALNLSGIVDS-LAGMFPFFRS-SYKGWRGSVR-HTLTKYDCFIN---DGY

GEW-TVDLTKVQ---SSAFRRQETI-VAR

>Lottia_gigantea_FoxH1/19-137

KPPYSYLGMV-ALIIQCSPGR-QQSLAGIIDT-LTDMFPFFQG-EYKGWKDSVR-HNMTNSDCFYKVEEMKR

CKW-AIDFKKLP---EDAMVRQDRR-KTT

>Branchiostoma_floridae_FoxF/46-162

KPPYSYIALI-VMAIQSSATK-RLTLSEIYQF-LQQRFPFFRG-PYQGWKNSVR-HNLSLNECFIKLPKGKG

HYW-TIDPASEFMF-EGSFAGDAR--VRR

>Capitella_tellata_FoxF/91-210

KPPYSYIALI-VMAIQSAPTK-RCTLAEIYQF-LQTRFPFFRG-SYQGWKNSVR-HNLSLNECFIKLPKGKG

HYW-TIDPAAEFMF-EGSFRRRPRG-FRR

>Lottia_gigantea_FoxF/70-188

KPPYSYIALI-VMAIQANPTR-RCTLSEIYQY-LQQKFPFFRG-TYQGWKNSVR-HNLSLNECFIKLPKGKG

HYW-TIDPAAEFMF-EGSFRRRPRG-FRR

>Crassostrea_gigas_FoxF1/72-190

KPPYSYIALI-VMAIQATPNK-RCTLSEIYNF-LQQRFPFFRG-TYQGWKNSVR-HNLSLNECFIKLPKGKG

HYW-TIDPAAEFMF-EGSFRRRPRG-FRR

>Novocrania_anomala_FoxF/52-169

KPPYSYIALI-VMAIQTSVTK-RCTLSEIYNF-LQQRFPFFRG-SYQGWKNSVR-HNLSLNECFIKLPKGKG

HYW-TIDPAAEFMF-EGSFRRRPRG-FRR

>Lingula_unguis_FoxF1/b/61-180

KPPYSYIALI-VMAIQAAPTK-RCTLSEIYQF-LQQRFPFFRG-SYQGWKNSVR-HNLSLNECFIKLPKGKG

HYW-TIDPAAEFMF-EGSFRRRPRG-FRR

>Saccoglossus_kowalevskii_FoxF/81-198

KPPYSYIALI-VMAIQSSPTK-RLTLSEIYQF-LMNRFPFFRG-PYQGWKNSVR-HNLSLNECFIKLPKGKG

HYW-TIDPASEFMF-EGSFRRRPRG-FRR

>Danio_rerio_FoxF1/45-164

KPPYSYIALI-VMAIQSSPTK-RLTLSEIYQF-LQSRFPFFRG-SYQGWKNSVR-HNLSLNECFIKLPKGKG

HYW-TIDPASEFMF-EGSFRRRPRG-FRR

>Homo_sapiens_FoxF1/41-159

KPPYSYIALI-VMAIQSSPTK-RLTLSEIYQF-LQSRFPFFRG-SYQGWKNSVR-HNLSLNECFIKLPKGKG

HYW-TIDPASEFMF-EGSFRRRPRG-FRR

>Mus_muculus_FoxF1/41-159

KPPYSYIALI-VMAIQSSPSK-RLTLSEIYQF-LQARFPFFRG-AYQGWKNSVR-HNLSLNECFIKLPKGKG

HYW-TIDPASEFMF-EGSFRRRPRG-FRR

>Homo_sapiens_FoxF2/93-212

KPPYSYIALI-VMAIQSSPSK-RLTLSEIYQF-LQARFPFFRG-AYQGWKNSVR-HNLSLNECFIKLPKGKG

HYW-TIDPASEFMF-EGSFRRRPRG-FRR

>Mus_muculus_FoxF2/93-212

KPPYSYIALI-VMAIQSSPSK-RLTLSEIYQF-LQARFPFFRG-AYQGWKNSVR-HNLSLNECFIKLPKGKG

HYW-TIDPASEFMF-EGSFRRRPRG-FRR

>Terebratalia_transversa_FoxF/95-214

KPPYSYIALI-VMAIQASPTK-RSTLSEIYQF-LQQRFPFFRG-TYQGWKNSVR-HNLSLNECFIKLPKGKG

HYW-TIDPAAEFMF-EGSFRRRPRG-FRR

>Membranipora_membranacea_FoxF/79-197

KPPYSYIALI-VMAIQSTPSK-RCTLSEIYSF-LQQKFNFFRG-SYQGWKNSVR-HNLSLNECFIKLPKGKG

HYW-TIDPSAEFMF-EGSFRRRPRG-FRR

>Owenia_fusiformis_FoxF1/100-222

KPPYSYIALI-VMAIQASATK-RCTLSEIYQF-LQTRFPFFRG-SYTGWKNSVR-HNLSLNECFKKLPKGKG

HYW-TIDPAAEFMF-EGSYRRRPRG-FRR

>Dinophilus_gyrociliatus/105-229 _FoxNA

KPPYSYIALI-VMAIQASPSK-RCTLSEIYQF-LQSRFSFFRG-QYQGWKNSVR-HNLSLNECFIKLPKGKG

HYW-TIDPTAEFMF-EGSFRRRPRG-FRR

>Drosophila_melanogaster_FoxF/304-434

KPALSYINMI-GHAIKESPTG-KLTLSEIYAY-LQKSYEFFRG-PYVGWKNSVR-HNLSLNECFKKLPKGKG

NYW-TIDENSAHLF-EGSLRRRPRG-YRS

>Pattela_vulgata_FoxF/1-73

-----------------------------------ERFPYYHD-HKQGWQNSIR-HNLSLNDCFVKVPRGKG

NYW-TLDPNCEEMF-NGNYRRRKRR-VKG

>Membranipora/102-225 membranacea_FoxNA

KPPYSYIALI-TMAVLQSKDK-KLTLSGICEF-IMKRFPYYRE-KFPAWQNSIR-HNLSLNDCFVKIPR-KG

NYW-TLDPASEDMF-NGSFLRRRKR-YKR

>Prostheceraeus_vittatus_FoxNA/91-213

KPPYSYIALI-TMAVLQSPQR-KLTLSGICEF-IMTRFPYYKE-RFPAWQNSIR-HNLSLNDCFVKVPRGKG

NYW-TLDPASEDMF-NGSFLRRRKR-YKR

>Platynereis_dum_FoxHb/111-228

KPPYPYAGII-IMAIQESPEG-MLTLAEILTS-ISEMFAHFKS-SYQGWKDSVR-HNLSQYPCFEMVVDKKC

NKW-TVNYDHVK---TKYFACSSSS----

>Platynereis_dum_FoxHa/26-154

KPPYPYAGMA-IMAIQQSPRG-KLTLSEILAS-ISEMFTYFRC-SYQGWKDSVR-HNLSQYACFEILPDGKC

NKW-IVNYDHVK---PKFFARNSPS----

>Convolutriloba_macropyga_FoxH1/58-182

KPPFSYQALI-IAAIWTSEAQ-QMTLREIFVF-LEKSFSFFRG-SYRGWRDSIR-HNLTSSCVFEKVLKKKS

NFW-KVRQEHMAVV-----QKDVSA-IQQ

>Crassostrea_gigas_FoxH1/677-805

LPPYTMSSMV-IYAIQCSPQK-ALTLSEICMS-LEAMFHVYCG-NDQAWYNKVR-NVLSKNNHFVKMRHSRK

CLW-TVDLSLVP---LSSFRKQTTR-KES

>Crassostrea_gigas_FoxHc/677-805

LPPYTMSSMV-IYAIQCSPQK-ALTLSEICMS-LEAMFHVYCG-NDQAWYNKVR-NVLSKNNHFVKMRHSRK

CLW-TVDLSLVP---LSSFRKQTTR-KES

>Crassostrea_gigas_FoxHb/1-116

-----MSSMV-IYAIHCSPQK-TLTLSEICVS-LEAMFHVISG-NDKAWYKKVR-NVLSKNTHFVKMRHSGK

SLW-TVDLSLVP---LTSFRKQTTR-KES

=== DELTA ===

>Pdu_delta

SGVFELQLLSFMNEKGLNADGNCCHGTFFKICLKHYQFAWPGTFSLIIEAWNLRMKYRVR

CETDYYGRGCTELCRSRDDRFGHYTCSGSKVCLDGWTGSYC

>Ofus_dll1

NGAFELNLQNFKNDNGFNSDGHCCNGTFFRICLTHYMFAWPGTFSLIVQAWHLFYRYRVV

CDEHYYGNKCTEYCKPRDDKNGHYTCNGEKVCLDGYTGAYC

>Hsap_dll1

SGVFELKLQEFVNKKGLLGNRNCCRGTFFRVCLKHYQFTWPGTFSLIIEALHLKYSYRFV

CDEHYYGEGCSVFCRPRDDAFGHFTCGGEKVCNPGWKGPYC

>Hsap_delta4

SGVFQLQLQEFINERGVLASGR----TFFRVCLKHFQFTWPGTFSLIIEAWHLRYSYRVI

CSDNYYGDNCSRLCKKRNDHFGHYVCQGNLSCLPGWTGEYC

>Skow_delta

SGIFQLRLASFSNDQGRNVSGQCCSVTFFRVCLKHYQFRWPGTFSLVIEAFHLHYSYRIV

CDEHYFGEECSDFCRPRDDNLGHYTCDGNKVCLPGWGGDSV

>Tcas_Delta

SGVFELRLISFDNEAGKDDKGKCCSGPRFRICLKEYQFTWPGTFSLIVEAWHLKFEYRVT

CKSHYYGKGCENLCRPRDDQFGHYSCSGERVCLAGWTGDYC

>Isca_delta

SGVFELQLRAFSNLLSQDSRGSCCSTTWFRVCLKHYQFSWPGTFSLIVEAWHAVFSFRVV

CEEHYFGADCARLCRPRDDKFGHYACNGDVVCLPGWRGDYC

>Tcas_serrate

SGFFELQVLEMANPRGELSTGECCGGTFFRLCLKEYQFRWTRSFTLILQAVDLTYRVRVK

CDSHYYNATCTKFCRPRDDKFGHYICDGDKECIEGWKGATC

>Hsap_jagged-2

MGYFELQLSALRNVNGELLSGACCDGTYVRVCLKEYQFAWPRSFTLIVEAWDLELQIRVR

CDENYYSATCNKFCRPRNDFFGHYTCDGNKACMDGWMGKEC

>Hsap_jagged-1

SGQFELEILSMQNVNGELQNGNCCGGTYFKVCLKEYQFAWPRSYTLLVEAWDFEYQIRVT

CDDYYYGFGCNKFCRPRDDFFGHYACDGNKTCMEGWMGPEC

>Pdu_jagged

SGQFQMQLVSLQNVKGELASGYCCRGTFIRFCLREYQFAWTRAFTLVFEILHMTYSLRVS

CDSNYYNTTCTKLCRPRHDAFGHYRCDGDKVCLQGWMGTNC

>Skow_jagged

SGYFELQILSVWNAAGELENGDCCDGTQVSVCLKEFQFRWMTFCTLILKILDVAYKIRIM

CDEYYYSTDCMTFCKPRDDDFGHYTCDGNKLCNTGWSGTNC

>Acali_delta

SSAPDV-------PRSRGPQWRCLFGSVFRPKVKYEEFCSQGDFSLIIEAWHLKYAFRFT

CDSNYFGAKCADLCRARDDKFGHYSCAGTKVCLDGWDGEYC

>Pdu_dlike1

DGMIKVRFKEFENKEGKAANGHCCDGHVFKICLDKPNEPLPAKVSVKVRIDDLEFEVFRE

CTHNFYGHDCSAFCQPAPRFKNQYLCDGNKICTSDWGGVDC

>Pdu_dlike3

SGEVRIKFIKYENDKGKGANGQCCDGHMFSVCLDAPGTVFPAEFDFKVVVFDLVFEASMV

CSNGYYGTNCGTHC-PAPSDTSHYECDGQKVCLQGWTGADC

>Pdu_dlike2

SGIASVKFVNYIGD-GKMADGKCCVPLFFTVCLNDPKQSWATAIDLTVTVNHLFMSISVG

CDEYYFGPGCGVYCKSSAGD--NYECGGEKICKAGWTGADC

>Smed_delta

KGVFEIHIKKYTLFPTLNLN-KCCPTIFMEICLSIYQERWKRNFNIIVKIKHLLVSFRYT

CSQNYHGEECDKLCKPSANERGFYNCSGDRICHTGYSGSYC

=== WNT ===

>Of_wnt1

QRRLVGAKVAIDECAYQFKNRRWNCGCRETAFIYAITSAAISHTVAQSCSDGSVWEWGGC

SDNADFGYDFSQDFIDVVEDLRCMMNLHNNEAGRTTVIQELRQECKCHSGSCTMKTCWKK

LAPFRVVSHKLKDRFPGVVDLVYYEKSPTFCEADNYLNSRGTRGRECNATSIGDGCDLMC

CGRGHTSETYLVRERCNCTFHWCCTVNCDICTRSRIRNTCL

>Lg_wnt1

QKKLVGAKMAIDECKYQFKNRRWNCGCRETAFIYAATSAAVSHSIARACSEGSIWEWSGC

SDNARYGHKFSRRFVDVLEDFRYMMNLHNNEAGRVHVSSGMKQECKCHSGSCTIKTCWMR

LPPFRNIGHILKDRFPGRRDLVYFEHSPTFCEKENMIGFEGTAGRECNSTSLGNGCDLMC

CGRGYKSETFPVKERCHCTFHWCCQVKCQVCTRLKVRNTCL

>Pd_wnt1

QRRVVGARVAIHECQFQFRNRRWNCGTRETAFIYAVTAAGVTHSVARACSEGSIWEWGGC

SDNIEFGQRFSREFVDLVEDLRYMMNLHNNQAGRIHVVSEQHQECKCHSGSCTVKTCWMR

LAPFRQTGARLKDRFPGPQDLVYFEESPTFCDENRTLGLQGTTGRQCNVSSIGDGCDLMC

CGRGWVEETYLSKERCNCTFHWCGQVTCHICNRTRVRHLCL

>Ct_wnt1

QRRLVAARMAVDECQRQFSTRRWNCGIRECAFIYAIMSAALAHSIARSCAEGSIWEWGGC

SDNAEFGRKFSHDFIDVAEDLKCLMNLHNSEAGRTQVSSEMSKECKCHSGSCTVKTCWMK

LPMFGRVGKVVKDRFPEPKDLVYFERSPTFCTKDPSIGHTGTHGRPCNASSIGEGCDLLC

CGRGYRSELYTARERCNCIFHWCCKVTCDTCTKTKVRHICL

>Sk_wnt1

QRKLISVGMSKTECKWQFKERRWNCGCRETAFIYAITASAVAHSVARSCSEGSIWEWGGC

SDNADFGSNFSRKFVDAGEDLRYYMNKHNNAAGRRIVTDNMRRECKCHSGSCQVKTCWMR

LPTFREVGDILKERFPTASDLVYFEESPDFCELNKKVGSLGTRGRQCNNTSIGDGCDLLC

CERGYRSEIEQVTERCSCTFHWCCQVKCETCVTQRTVHTCL

>Hs_wnt1

QRRLIGLQSAVRECKWQFRNRRWNCGCRETAFIFAITSAGVTHSVARSCSEGSIWHWGGC

SDNIDFGRLFGREFVDSGEDLRFLMNLHNNEAGRTTVFSEMRQECKCHSGSCTVRTCWMR

LPTLRAVGDVLRDRFPSPHDLVYFEKSPNFCTYSGRLGTAGTAGRACNSSSPADGCELLC

CGRGHRTRTQRVTERCNCTFHWCCHVSCRNCTHTRVLHECL

>Dm_wnt1

QRRLVGANLAISECQHQFRNRRWNCGCRETSFIYAITSAAVTHSIARACSEGTIWEWGGC

SDNIGFGFKFSREFVDTGENLREKMNLHNNEAGRAHVQAEMRQECKCHSGSCTVKTCWMR

LANFRVIGDNLKARFPGSKDLVYLEPSPSFCEKNLRQGILGTHGRQCNETSLGDGCGLMC

CGRGYRRDEVVVVERCACTFHWCCEVKCKLCRTKKVIYTCL

>Tc_wnt1

QRRLAGANNAIHECQHQFRNQRWNCGCRETAFIYAITSAAVTHAIARACSEGSIFEWGGC

SDNIGFGFTVSREFVDAGETIREKMNLHNNEAGRWHVKDQMRQECKCHSGSCTIKTCWMR

LPPFRVIGDLLKDRFPGTKDLVYYEMSPGFCEKNPKLGIQGTHGRLCNDTSMGDGCDIMC

CGRGYRTQEVVVFERCNCTFHWCCEVKCDVCRTKRTIHTCV

>Bf_wnt1

QRRLVRPMLAIKECHHQFSKWRWNCGCTQTAFIYAVMSAAVAHEVGRNCAEGTIWEWGGC

SDNVEFGKQFAKQFVDAGESVRYLVNMHNNEAGRVAVAENLRRECKCHSGSCTLKTCWMR

LPNFRDVGDSLKEKFPTDNDLVYHERSPNFCRNNPRLGFEGTRGRECNVTSRGDGCDLLC

CGRGYATRQEVTKERCNCTFQWCCQVKCEECVRTKTIHTCL

>Bf_wnt6

------------------------------------------------------WEWGGC

GDDIDFGYTKSREFMDAQTDIRTLLTLHNNEAGRLAEKNFMRTECKCHSGSCAVKTCWKK

MPIFREVGVRLKERFPTAEDLVYTNESPNFCKRNRKTGSQGTKGRACNATSMGGGCDLLC

CGRGYKERQVVVGENCKCRFHWCCVVKCSKCTAVKTVHECL

>Sk_wnt6

--------------------------------------AGVTYAVTQACSMGELWEWGGC

ADNIEFGYQKSKEFMDAQDDIRTLINLHNNEAGRLAIKKNMRIECKCHSGTCTVKTCWQK

MPVFRFVGNRLKEKFPTDEDLVYTAKSPDFCEPNRRVGSLGTGGRNCNNTSLDGGCDQLC

CGRGYKEETITVTENCKCRFHWCCVVNCDTCTTKKTIHKCN

>Lg_wnt6

QRAICGAKVALMECQYQFRTRKWNCDTREAAFVYAITAAGVVYAVTEACSMGRLWEWGGC

GDNVDFGYQKSREFMDARRDVTTLVQLHNNEAGRQAVRKYMRKECKCHSGSCTLKTCWRK

MPLFRDVGNRLKQKFPSKEDLVYSEESPDFCRRNKKEGALGTRGRECDPTSMGGGCDLLC

CGRNYSKKQVTIKENCNCRFMWCCEVICETCQKIKTETRCL

>Hs_wnt6

QAELCGARLGVRECQFQFRFRRWNCDIRETAFVFAITAAGASHAVTQACSMGELWEWGGC

GDDVDFGDEKSRLFMDARHDIRALVQLHNNEAGRLAVRSHTRTECKCHSGSCALRTCWQK

LPPFREVGARLLERFPGRADLLYAADSPDFCAPNRRTGSPGTRGRACNSSAPDSGCDLLC

CGRGHRQESVQLEENCLCRFHWCCVVQCHRCRVRKELSLCL

>Ct_wnt6

QHEMCGAKMAISECQHQFRHRRWNCDTREAAFVHSLTSAGVLYAVTQACSLGLLWEWAGC

NEDVRFGSRKAAEFLDIPPDVQGRILLHNNKAGRASVAKYQQKICKCHSGSCELKTCVLK

MPSFRDVGDRLKERFPSGENLVYLDESPSFCKPSRKQGSLGTLDRLCNPDTSTDSCDIMC

CGRGYRSYKVVVQENCRCQFKWCCKVICQTCSRTLSIHRCN

>Pd_wnt6

HRQICGVRMALDECQVQFRDRRWNCDTRETAFVYALTAAGVLYSITHACSTGQSFEWGGC

SDNVRFGYQKTRDLLDVVRDITTLVRMHNNKAGRLAVRNHVRKVCKCHSGSCTLETCWLK

MPRIHSIGRHLKQKFPDGEDLVYTTQSPDFCRVDKKQGSLGTHGRRCNPKSKADGCELMC

CGRGYIKSLRKSLQNCQCRLVWCCQVICKTCTKVETIYNCR

>Tc_wnt6

MAEICGVELGQRECQYQFRFRRWNCDTRETGFVNAVLAAGVTYQVTRACTTGELWEWEAC

GENIDFGLKKSKDFLDTRYDMKTLVKLHNYVAGRMAIKNHMRTECKCHSGSCTLKTCWRK

MPPFREVGNRLKERFPGKTGLVYSEESPHFCLPNNTLGSFGTQGRTCVETSPGEGCSILC

CGRGSRSHDETEEKNCKCKFLWCCEVKCEKCNETRTISTCL

>Dm_wnt6

LAEICGINLGFRECEFQFRNRRWNCDSRETGFVNAITAAGVTYAVTKACTMGQLWEWGGC

SDNVNFGLRHSRVFLDAKQDLGTLVKFHNNNAGRLAIRDAMRLECKCHSGSCTVKTCWLK

MPPFREVAGRLRDRYANKYQLVFADDSPDFCTPNSKTGALGTQGRECNVTSSGDRCDRLC

CNRGHTRRIVEEQTNCKCVFKWCCEVTCEKCLEHRAVNTCL

>Of_wnt2

QRDLCGAEIGLAECKDQFSTRRWNCKGREKAYIFAISSSGVMFAVTRACAKGVLFKWGGC

SHNIKYGDKFTKEWVDAQETKDGLMNTWNNEAGRKAIKASTKLICKCHSGSCSQKICWRS

MGNFKEVGSILKEKFPTKKDLVYIDDSPDFCEYNPETGSLGTKDRLCNKSSQGDGCALMC

CGRGYHTIVRTVSEECDCTFFWCCRVVCKKCQSRVEEHFCN

>Ct_wnta

--------MGIDECQHQFRDRRWNCKTREKAYIYAVSSAGVMFAVTTACAKGELFIWGGC

SHNVAFGDRFTREFVDSNENDEGLMNLWNNNAGRKAIRTSMKLLCKCHSGSCSAKICWKT

MTGFRNIGSQLKDKFPNKKDLVYLQESPDFCSSNTTIGSLGTQGRACNKTSYGDGCSLMC

CGRGYQTTLITVVEDCNCKFVWCCNVVCDECIKREERHICN

>Pd_wnta

QMELCGASTGIEECQYQFSDRRWNCETRERAYIYAVSSAGVMYSITKACAKGDLFLWGGC

SHNVKFGERFTREFVDTKEDPDGLMNIWNNGAGRKTIKSSMRLLCKCYSGSCSVKICWRT

MAPFREIGRHLKQKFPAKDELVYMEDSPDYCEYDPGIGSLGTRGRQCNRTSYGDGCSLMC

CGRGYYTTVREIKEDCNCKFHWCCRVECDKCSKKIEEHFCN

>Lg_wnta

--------MGIDECQHQFRDRRWNCKSRETGYIYAILSAGIMYSVTRACAKGDLFEWGGC

SDNIRYGSKFSKDFVDSKESEDGLMNVWNNGAGRKMVKDELELMCKCHSGSCSVKICWRK

MKSFRAIGSALKGRFPTKKDLVYLNESPDFCEHNLENGSVGTRGRECNKTSYGDGCRLMC

CGRGYYTLIKEEKDDCDCKFYWCCRVECKKCTNVKEMHYCN

>Tc_wnta

QKQLCGARLAMDECQHQFRNSRWNCRSREAAYLSAVSAASVAFAVTRACSKGDLWKWGGC

SEDIKYGEKFSRDFLDSKETADGLMNLHNNEAGRRSVKSRMVRTCKCHSGSCSMQICWRR

LPPFRKVGDALFQRYPNKTDLVYLDDSPDYCEKNETLSILGTHGRICNRTSQGDGCRLLC

CGRGYQTRVREVEEKCKCHFVWCCNVVCDICRYRREEHVCN

>Of_wnt4

QKHICGASMAIKECQFQFRNRRWNCGTREVAFVHSISSAGVSHTVTRACSSAKLFDWAGC

SDNIAYGNAFSKTFVDAREGGRSLMNLHNNEAGRQVIDDNMRVECKCHSGTCELKTCWRA

MPTFRTVGEKLKEKFHTGSDLVYLVPSPDYCEMDPHTGSIGTSGRLCSKASKADGCDLMC

CGRGFTTRVKTVTERCMCKFHWCCYVKCKECQREVEEHTCL

>Lg_wnt4

QKKLCGARVAIEECQSQFGNRRWNCGTREAAFVHAISSAGVAHSVTRACSSGTLFEWSGC

SDNIDYGMAFSKAFVDARETGRALMNLHNNEAGRKAVDANMKVECKCHSGSCEMRTCWKA

MPSFKKVGEILKEKFHTESDLVYMVASPDFCEADKKTGSLGTHGRICNKTSKADGCELLC

CGRGYRTRIVTIKERCFCKFLWCCYVKCKECTRQIEEHTCL

>Pd_wnt4

QKKICGAIEAIHECQFQFRNRRWNCGSREASFVHAISSAGVAHPVTRACSSGTMFEWAGC

SDNIAFGTAFSRTFVDARESSRVLMNLHNNEAGRKIIEENMLTQCKCHSGSCELKTCWRA

MPSFRKIGYMLKEKFHSSTDLVYLVASPDFCERDPKTGALGTHGRRCNKTSKADGCELMC

CGRGYVTKKRVIIERCHCKFHWCCYVKCQNCKREIEEHTCL

>Ct_wnt4

QKKICGAVSAIDECQYQFQNRRWNCGTREAAFVHAISSAGVTYAVTKACSSGQVFEWAGC

SDNVAYGSAFCGMFVDARESSRALMNLHNNEAGRLAVEENMKVQCKCHSGSCEMKTCWRG

LPSFREVGAMLKDRFHETQDLVYLEASPDYCISDPETGSLGTSGRTCNRSSKADGCELMC

CGRGFNVKRRVVDERCHCKFHWCCYVKCQQCKKVVDEYVCR

>Bf_wnt4

QVQICGARMSIEECQFQFRHRRWNCGTREAAFVHSISAAGVAHAVTRACSSGELFHWAGC

SDNFAFGAAFSQTFVDARESSRALMNLHNNEAGRRNLVDHMKTECKCHSGSCELKTCWRA

MPPFREVGARLKEKFHSSSDLVYLDASPDFCVRDTKVGSMGTVGRVCNKTSKADGCELLC

CGRGYNTHTREVVERCSCKFHWCCYVKCKTCRRTVEVHTCK

>Hs_wnt4

QVQMCGAQLAIEECQYQFRNRRWNCGTREAAFVYAISSAGVAFAVTRACSSGELFQWSGC

SDNIAYGVAFSQSFVDVRESSRALMNLHNNEAGRKAILTHMRVECKCHSGSCEVKTCWRA

VPPFRQVGHALKEKFHTDEDLVYLEPSPDFCEQDMRSGVLGTRGRTCNKTSKADGCELLC

CGRGFHTAQVELAERCSCKFHWCCFVKCRQCQRLVELHTCR

>Sk_wnt4

QIQVCGADMAISECQYQFKNRRWNCGTREAAFVHAISSAGVAHSVTTACSSGELFQWSGC

SDHIDYGSIFSKEFVDARENNRSLMNLHNNEAGRRTIESNMKIQCKCHSGSCETKTCWRA

LPTFREVGEKLKEKFHTDADLVYLDESPDFCENDLKSGSLGTTGRRCNKTSKADGCDLMC

CGRGYDSYTEELVERCSCKFHWCCYVKCKKCRRTVQINICR

>Bf_wnt5

QRKLCGARQGIEECQHQFRDRRWNCGSREASFTYAIAAAGVVNAVSRACREGELWLWGGC

GDDVEYGYYFAREFVDAQEHARQLMNMHNNEAGRKLTFSNARVACKCHSGSCSLKTCWQQ

LADFRTVGNLLKDKYFTDEDLVYLNKSPDYCNADPTIGSLGTHGRECNKTGLGDGCNLMC

CGRGYNTFKREKVERCNCKFHWCCYVKCKRCRSIKNVYVCK

>Hs_wnt5a

QKKLCGAKTGIKECQYQFRHRRWNCGSRETAFTYAVSAAGVVNAMSRACREGELWLWGGC

GDNIDYGYRFAKEFVDARESARILMNLHNNEAGRRTVYNLADVACKCHSGSCSLKTCWLQ

LADFRKVGDALKEKYPTTQDLVYIDPSPDYCVRNESTGSLGTQGRLCNKTSEGDGCELMC

CGRGYDQFKTVQTERCHCKFHWCCYVKCKKCTEIVDQFVCK

>Hs_wnt5b

QRKLCGAKTGIKECQHQFRQRRWNCGSRETAFTHAVSAAGVVNAISRACREGELWLWGGC

GDNVEYGYRFAKEFVDAREQGRVLMNLQNNEAGRRAVYKMADVACKCHSGSCSLKTCWLQ

LAEFRKVGDRLKEKYPTPEDLVYVDPSPDYCLRNESTGSLGTQGRLCNKTSEGDGCELMC

CGRGYNQFKSVQVERCHCKFHWCCFVRCKKCTEIVDQYICK

>Sk_wnt5

QTKLCGAKSGIEECQYQFSERRWNCASREKAFTYAISAAGVVNAISRACREGELWLWGGC

GDNVDYGYRFTKEFVDMKEHGIMKMNLHNNEAGRKAVLSMADVMCKCHSGSCSMKTCWLQ

LANFRDVGNELKERYPTAFDLVYLDPSPDYCIYDPSTGSLGTVGRLCNKTSMGDGCNLMC

CGRGYNTFQQEVVERCHCKFHWCCYVKCKRCKKIVDMHICK

>Ct_wnt5a

-----GAKIALGECQQQFHSRRWNCGSRESAFTYAIFAAGVVHAVSRSCRDGQLWLWGGC

GDNTDYGYRFAQGFVDIRELARTLMNLHNNEAGRRAVYSHTVVACKCHSGSCSLKTCWNQ

LAPFRGTGNRIKDAYPTKEDLLYLAESPDYCEADPGIGSLGTQGRQCNKHSQGDGCNLMC

CGRGYNTYKAKVSERCQCKFHWCCYVQCKTCERVVDINTCK

>Ct_wnt5b

QTKFCGAKIALGECQQQFHSRRWNCGSRESAFTYAIFAAGVVHAVSRSCRDGQLWLWGGC

GDNTDYGYRFAQGFVDIRELARTLMNLHNNEAGRRAVYSHTVVACKCHSGSCSLKTCWNQ

LAPFRGTGNRIKDAYPTKEDLLYLAESPDYCEADPGIGSLGTQGRQCNKHSQGDGCNLMC

CGRGYNTYKAKVSERCQCNFHWC------------------

>Pd_wnt5

QIKICGAQMGIRECQWQFRHRRWNCPSREAAFINAISAAGVVHTVARSCRDGELWIWGGC

GDNSEYGYRFAEGFIDARELARTLMNVHNNEAGRRAVFMHSKVACKCHSGSCSLKTCWNQ

LPSFREVGDRLKDKYPTKEDLLYLSLSPDYCLANDKTGSMGTTGRFCNKTSPGDGCTLMC

CGRGYNTYRTVVQERCQCKFHWCCYVKCKTCQREVDVHTCK

>Lg_wnt5

QIRFCGAQLGIHECQYQFRNRRWNCGNREAGFTHSISAAGVVYAISRACREGELWIWGGC

GDNIEYGYKFAKAFVDMRELSRMLMNVHNNEAGRRAVYNFAKVACKCHSGSCSLKTCWQH

LPNFREIGNRLKDRYYTKNDIIFLDDSPDYCDKNAETGSVGTAGRECDRNSQGGGCGLLC

CGRGYNTFKRKLIERCNCKFHWCCFVRCGSCERYVDVHICR

>Tc_wnt5b

QIRLCGARQALSECKHQFENRRWNCASRESAFAHALASAGVSYAVSRACRDGQLWVWGGC

GDNLEYGYKFTQNFVDVREQGRNLMNLHNNEAGRRAVIKKSKVTCKCHSGSCSLITCWQQ

LATFREIGDYLRDKYPTAYDLVYMEDSPNYCIRDERVGSLGTQGRTCNRTSQDDGCNLLC

CGRGYNTLKSTIKERCHCKFKWCCEVECKTCVRSVDVHTCK

>Ct_wnt2

QRLLCGAKKGVKQCQRQFRHHRWNCGSKEAAFVYAISSAGVVHAITRACSQGRLFDWGGC

SDNVRYGSHFARMFVDAREDARALMNLQNNRAGRRAVRRHMTLECKCHSGACTIRTCWLA

LQEFSRVGSYLKTRYTTRSDIVFFDESPDYCVQDPLAGSLGTADRECNHTSKGHGCDVMC

CGRGYDTHVVRRMRKCDCKFHWCCYVKCRECEELVKVNTCR

>Pd_wnt2

QRKLCGAKIGVKECQAQFSQYRWNCGSREAAFVYAISSSGVVNAVTRACSKGELFDWGGC

SDNVRYGAKFSRLFIDAREDARALMNLHNNRAGRRAVKKFMKLQCKCHSGSCTIRTCWLA

MQDFRRVGAFLKSKYATRSDLVYLEDSPDYCLQDTGIGSLGTAGRECNKTSLGEGCDIMC

CGRGYDVRTEQRTEKCECKFHWCCYVQCKECTKLVDVHTCK

>Lg_wnt2

QRKMCGARLGVEECQYQFQDHRWNCGTREAAFVYSISSAGVVYSITSACSKGELFDWGGC

SDSVRFGSRFSRMFVDAKEDARALMNLHNNRAGRRAVRRFRKLMCKCHSGSCTLRTCWLA

MEDFRRVGDFLKRKYPTRSDLVYFESSPDYCIKDEESGSLGTEGRECIKGSLGGGCDIMC

CGRGYDTKTIVKQEQCECKFHWCCLVKCKECSKTMDVQTCK

>Sk_wnt2

QRQLCGAKEGVKECQFQFKNNRWNCASREAAFVYAISSAGVVHAITRSCSKGELFDWGGC

SDNIKFGSDFSRHFVDAREDARALMNLHNNRAGRRAVQKNMKLECKCHSGSCTIKTCWLA

MEEFRKVGDYLRVKYPTRLDLVYFEASPDYCVADESTGSLGTAGRVCNKTSMGGGCDIMC

CGRGYDTTRAKRTTKCECKFHWCCKVICHDCTDIVDVHTCK

>Hs_wnt2

QRQLCGVAEWTAECQHQFRQHRWNCSSRESAFVYAISSAGVVFAITRACSQGEVFDWGGC

SDNIDYGIKFARAFVDAKEDARALMNLHNNRAGRKAVKRFLKQECKCHSGSCTLRTCWLA

MADFRKTGDYLWRKYPTKNDLVYFENSPDYCIRDREAGSLGTAGRVCNLTSRGDSCEVMC

CGRGYDTSHVTRMTKCGCKFHWCCAVRCQDCLEALDVHTCK

>Hs_wnt2b

QRQLCGAREWIRECQHQFRHHRWNCSSREAAFVYAISSAGVVHAITRACSQGELFDWGGC

SDNIHYGVRFAKAFVDAKEDARALMNLHNNRCGRTAVRRFLKLECKCHSGSCTLRTCWRA

LSDFRRTGDYLRRRYATRTDLVYFDNSPDYCVLDKAAGSLGTAGRVCSKTSKGDGCEIMC

CGRGYDTTRVTRVTQCECKFHWCCAVRCKECRNTVDVHTCK

>Bf_wnt3a

QIRYCGTKLGIRECQHQFRGRRWNCASREAAFVHAITSAGVAYSVTKACAEGTSWRWGGC

SEDVLFGTKFSRDFVDARIDGRSAMDRHNNEAGRQSIMKNLQLKCKCHSGSCEIKTCWWA

QPDFRTVGNVLKDKYPGKDDLIYFEVSPNFCEPNNSTGSLGTKGRECNITSQGDGCQLMC

CGRGWNTRTEMRTEKCHCQFHWCCYVTCQECQKKHQVHTCK

>Hs_wnt3

QLRFCGVKLGIQECQHQFRGRRWNCATRESAFVHAIASAGVAFAVTRSCAEGTSWKWGGC

SEDADFGVLVSREFADAREDARSAMNKHNNEAGRTTILDHMHLKCKCHSGSCEVKTCWWA

QPDFRAIGDFLKDKYPTERDLVYYENSPNFCEPNPETGSFGTRDRTCNVTSHGDGCDLLC

CGRGHNTRTEKRKEKCHCIFHWCCYVSCQECIRIYDVHTCK

>Hs_wnt3a

QLRFCGIKIGIQECQHQFRGRRWNCATRESAFVHAIASAGVAFAVTRSCAEGTAWKWGGC

SEDIEFGGMVSREFADAREDARSAMNRHNNEAGRQAIASHMHLKCKCHSGSCEVKTCWWS

QPDFRAIGDFLKDKYPTERDLVYYEASPNFCEPNPETGSFGTRDRTCNVSSHGDGCDLLC

CGRGHNARAERRREKCRCVFHWCCYVSCQECTRVYDVHTCK

>Sk_wnt3

QLRFCGAQLGIRECQNQFKGRRWNCASRETAFVHAILSAGLVHTVTRACASGELWKWGGC

SEDIRYGTRFSRDFLDPQEYARSVMNLHNNEAGRQTIAKTMETQCKCHSGSCEVKTCWKQ

QSAFKILGDLLKEKYPTSADLIYYEPSPNFCKHDPSIGSFGTEGRRCNATSNGEGCDLMC

CGRGYNTIPEEVVERCECQFIWCCKVKCKSCRRMYDLHTCK

>Bf_wnt10

------------------------------------------------------------

------------------------------------------------SGSCNLKTCWKA

TPDFREVGVILKERFPFATDLVYFDRSPDFCDRNRELETPGTRGRICNKTSTGDSCAALC

CGRGFNIFRQTRVERCNCKF---------------------

>Hs_wnt10a

QMEVCGIQIAIHECQHQFRDQRWNCGFRESAFAYAIAAAGVVHAVSNACALGKLWEWGGC

SPDMGFGERFSKDFLDSREDIHARMRLHNNRVGRQAVMENMRRKCKCHSGSCQLKTCWQV

TPEFRTVGALLRSRFASPADLVYFEKSPDFCEREPRLDSAGTVGRLCNKSSAGDGCGSMC

CGRGHNILRQTRSERCHCRFHWCCFVVCEECRITEWVSVCK

>Hs_wnt10b

QLGLCGLHIAVHECQHQLRDQRWNCGFRESAFSFSMLAAGVMHAVATACSLGKLWEWGGC

NHDMDFGEKFSRDFLDSREDIQARMRIHNNRVGRQVVTENLKRKCKCHSGSCQFKTCWRA

APEFRAVGAALRERLRLSGELVYFEKSPDFCERDPTMGSPGTRGRACNKTSRLDGCGSLC

CGRGHNVLRQTRVERCHCRFHWCCYVLCDECKVTEWVNVCK

>Lg_wnt10a

QYDLCGVQVAIHECQFQLAEYRWNCG----------------------------------

------------------------------------------------------------

------------------------------------------------------------

-----------------------------------------

>Pd_wnt10

QYSLCGIQVAIHECQRQFKTHRWNCGYKETAFAYAILAAGVVTQVARACSLGKLWQWKGC

DHNVEFGNAFGRKFLDSEDDFMSKVNRHNNKVGRMTVFENLRKMCKRHSGSCEMKTCWRA

APQFHVVGEVLKQKYPSKSSLVFYETSPNFCEDSSWLDSPGTRGRYCNKTSTDDNCETLC

CGRGYNTLKVTRVERCNCRFHWCCYVVCKKCLISDWVTVCK

>Ct_wnt10

QYALCGLKMAMEECQFQFREHRWNCGYRETAFASAISAAGMSAQIALACAMGNLWVWKGC

QHNVRFGDYFTRKFWGSKKNVYSEMDVHNSRAGRMIWRENVRLHCKCHSGSCEVRTCWKA

ASSFRKVGSIIKQKFIDNTDLVYFERSPNFCEPDKTLDSPGTVGRVCNSSSLHDSCDTLC

CGRGYNTVRLTKIERCQCKFRWCCDVLCKKCLMTSWVTVCK

>Lg_wnt10b

------------------------------SFAYAISSAGVTHQVSKACSMGKLFEWGGC

SHNINFGAKYASKFLDSKEDIHAQINLHNNRAGRLAIIRHVRKQCKCHSGSCELKTCWKA

APDFRAVGTILKKKYPKHLELLFYEKSPNFCDPNPLVDSPGTTGRLCNKTSGGNNCETLC

CGRGYNTLRVKRTERCHCKFFWCCYVTCKTCEYDEWVTVCK

>Sk_wnt10

QHRICGMMVAVHECSYQMRDRRWDCGYKETAFVHAIASAGVAFQVTRSCAEGRHWKWGGC

SHNVDFGEEFAQKFLDIREDVHSRINLHNNAAGRSIVSRSREKMCKCHSASCQIKTCWMS

TPKFREIGNIVKQKYAKVADLMYSERSPDFCEPSAFLGTPGTRGRSCNNTSTGDNCDSMC

CGRGYNIKSSSKVEKCNCAFHWCCFVTCDDCATSQWVNECK

>Bf_wnt7a

------------------------------------------------------------

------------------------------------------QECKCHSGSCTTKTCWTT

LPKFRELGYILKDKYPMDTDLVYIEKSPNYCEEDPVTGSVGTQGRMCNKTAQQDGCDLMC

CGRGYNTHQYSRVWQCNCKFHWCC-----------------

>Hs_wnt7a

QRAICGSQMGLDECQFQFRNGRWNCGSREAAFTYAIIAAGVAHAITAACTQGNLWKWGGC

SADIRYGIGFAKVFVDARENARTLMNLHNNEAGRKILEENMKLECKCHSGSCTTKTCWTT

LPQFRELGYVLKDKYPMDTDLVYIEKSPNYCEEDPVTGSVGTQGRACNKTAPQSGCDLMC

CGRGYNTHQYARVWQCNCKFHWCCYVKCNTCSERTEMYTCK

>Hs_wnt7b

QRAICGAQMGINECQYQFRFGRWNCGSREAAFTYAITAAGVAHAVTAACSQGNLWKWGGC

SADVRYGIDFSRRFVDARENARRLMNLHNNEAGRKVLEDRMQLECKCHSGSCTTKTCWTT

LPKFREVGHLLKEKYPMETDLVYIEKSPNYCEEDAATGSVGTQGRLCNRTSPGDGCDTMC

CGRGYNTHQYTKVWQCNCKFHWCCFVKCNTCSERTEVFTCK

>Bf_wnt7b

QRAICGAQRGIDECRYQFRHSRWNCGSKEAAFTYAISSAALVHAIVTACSQGNIWKWGGC

SADVKYGLRFCKKFVDARENARALMNLHNNEAGRKVIDQHTRLECKCHSGSCTMKTCWIT

LPRFREVGNILKEKYPREISLVYLRGSPNYCERDEATGSLGTHGRRCNRTSPYDGCDLMC

CGRGYNTHQFVKTWQCNCKFHWCCYVKCNQCSERTEEYTCK

>Sk_wnt7

QRSICGAQKGQEECRWQFRNSRWNCGNKEASFVYAINSAGVAHAITQACSQGNLWKWGGC

SADVDYGIRFSRVFVDAQENARVLTNLHNNEVGRLLLSECMDLECKCHSGSCTMKTCWTT

LPAFRTVGTTLLEKYPPRKSLVYLHKSPNYCEYDPKGGSSGTVGRRCNRTSTEDGCDLMC

CGRGYNTHQYTKTWQCNCKFHWCCFVNCIQCSERTEEYTCK

>Lg_wnt7

QRAICGAKLGLTECQYQFRFMRWNCGTKEAAFIYAMTSAGVSYAITQSCGLGSLWKWGGC

SADIKHGLRLARKFMDARENARSLMNLHNNRAGRKAVKDNMGTDCKCHSGSCTMKTCWTT

LPPFRKIGDSLKKRYPRRSHLVYLDKSPNYCDFDGKTGSLGTVGRKCNRTTKDDGCDLMC

CGRGYNTHQYTRTWQCNCKFHWCCYVNCNKCSERTEEYTCK

>Pd_wnt7

QRTICGASLASSECLFQFRKHRWNCGTKEAAFMYAIRAAGVAFAITQSCSSGNLFNWGGC

SVDVRYGLKFSRVFIDAREDSRSLMNLHNNRAGRKALKDLMARDCKCHSGSCTLRTCWRT

LPSFRSIGASLMRRYPRRADLVYLRHSPNYCENDPLTGSLGTRGRQCNRTSTGDGCGMLC

CGRGYNTHQFMRTWKCNCKFHWCCKVTCQNCSERSQIFTCK

>Ct_wnt7

QRTICGAKLAFEECSYQFRLHRWNCASKEAAYTSAIRSAGVSYIITQACSQGSIWKWGGC

SADIKYGLTFSRLFLDSKEDERALMNLHNNRAGRKAVKSQMDTQCKCLSGACTIKTCWTT

LPGFRSIGDHLKQKFPRKADLVYLKRSPSYCEKDEGIGSLGTTGRLCNRTANSNNCDLMC

CGRGYNTHQYTRTWQCDCKFHWCCHVTCDECTELTEEYTCK

>Tc_wnt7

QREMCGIRLATAECKYQFRHQRWNCGSREAAFTYAISSAGVAYAVTSACARGNIWKWGGC

SVDINFGMRFARKFMDAREDERSVMNLHNNKAGRKAVKMSLLTECKCHSGSCTMKTCWKT

LPGFRQVGDNLMKKYPKKSDLVFLQTSPNYCERDLAAGSLGTVGRSCNRTSRGDGCDLMC

CGRGYNTHQYTRTWQCRCKFHWCCYVDCDTCSERTEEYTCK

>Dm_wnt2

QRNMCGHQLGAQECQHQFRGHRWNCASREAAYTYAIASAGAAYAVTAACARGNIWKWGGC

SADVDFGMRYARRFMDAREDSRTLMNLHNNRAGRTLVKKMLRTDCKCHSGSCVMKTCWKS

LPPFRLVGDRLMLKYPKRMELIYLEASPNYCERSLQTGSQGTSGRTCQRTGHGQSCDLLC

CGRGHNTQHIRRTTQCRCQFRWCCEVKCDECDESYEEFTCK

>Ct_wnt16

QLRVCGARVGIEECHHQFKKERWNCGTKETAFMYAVTSAGVVHAVTKACSSGNLWKWGGC

SDNVDYGMWFAETFVDAPEDIRSLMNLQNNAVGRQVINDQMNLKCRCHSGSCAVKTCWRT

LTSFREAGNELKQKYNNGLDMVYIEDSPNYCRKNMKRGILGTKGRECERDPDADSCNTLC

CGRGYNTEVVRFVERCQCKFVWCCEVKCKICETITDKQTCK

>Lg_wnt16

QKEVCGARRGILECQKQFKFERWNCGTREAAFIYAILSAGVVHSVTQSCSAGNLFQWGGC

SDNVDYGLKFSRGFVDAPEDIRNLMNLHNNEVGRQIVEKNMQLRCRCHSGSCAVRTCFRS

LPNFRKVGLELKDKYISKQELVFVHRSPNYCKEDIKRGIFGTRGRVCNRSSPTESCDLLC

CGRGYNTQVVKYVERCHCKFFWCCYVKCKTCETMMDIHTCK

>Pd_wnt16

QIEMCGVRLGIHECQSQFRYERWNCATREAAFIHAVTAAGVVHAVTQSCSAGNLWKWGGC

SDNVDYGVWFAKTFVDAVEDIRSLVNLQNNQVGREAIAKQLHLRCRCHSGSCAVKSCWKT

MPNFNEVGKFLKKRYIKGDELVYLDPSPNYCRQNPDKGIMGTRGRECKKDSKGDSCDLLC

CGRGYNTEVIRMVERCHCKFVWCCKVKCKICETMVDKHTCK

>Sk_wnt16

QKTVCGARLGITECQKQFQRERWNCGNRETAFIYSVTTAGVVYAVTRACSAGNLWNWRGC

SDNIHYAIGFSKTFVDAPDLLRSLMNLHNNEVGRKAIEEQMDIQCRCHSGSCNVKSCWKT

MPHFPNVGDYLKTRYINTTEMVYMDQSPNYCMEDTLNGVPGTSGRECNRTSLLDSCDLLC

CGRGYNTQVVRYVERCGCKFIWCCYVKCNTCETMIDRYTCK

>Hs_wnt16

QKELCGARLGIQECGSQFRHERWNCGTKETAFIYAVMAAGLVHSVTRSCSAGNMWHWGGC

SDDVQYGMWFSRKFLDFPIKVLLAMNLHNNEAGRQAVAKLMSVDCRCHSGSCAVKTCWKT

MSSFEKIGHLLKDKYIHKDDLLYVNKSPNYCVEDKKLGIPGTQGRECNRTSEGDGCNLLC

CGRGYNTHVVRHVERCECKFIWCCYVRCRRCESMTDVHTCK

>Bf_wnt11

QTQLCAAESARKTCQEQFGNRRWNCGTKEAAYVHALSSAAVVHTVARACAAGYLYTWGGC

GDNVKFGLEFGSRFADAPMHTQTLMNLHNSEAGRLAVQNTMTTKCKCHSGSCNVKTCWKS

LADLTEISHELAEKYHGSGDLIFVENSPNYCMVNNRKGSYGTTGRLCNKTSVGDSCQTMC

CGRGYNDFTVTVTERCNCKYHWCCYVTCDQCTRTEKKYMCK

>Sk_wnt11

QKKICAAELTKQTCVKQFADRRWNCGTREAAFAYALAAAAISYSMAIECSSGAIFHWGGC

SDNVGYGMSFSARFADAPLQPESLMGLHNNQAGLLTVQENMKRKCKCHSGSCNVKTCWQS

LPEMEEIGSKLKRKYFTEQDLIYLTNSPDYCRQNEKTGSLGTVGRFCNKTSIGDGCDLMC

CGRGYKSMVITIVEQCQCRYHWCCYVKCKECSRTAEVQVCK

>Hs_wnt11

QVQLCAAREVMKACRRAFADMRWNCGTRESAFVYALSAAAISHAIARACTSGDLNRWGGC

ADNLSYGLLMGAKFSDAPMQANKLMRLHNSEVGRQALRASLEMKCKCHSGSCSIRTCWKG

LQELQDVAADLKTRYVKDSELVYLQSSPDFCMKNEKVGSHGTQDRQCNKTSNGDSCDLMC

CGRGYNPYTDRVVERCHCKYHWCCYVTCRRCERTVERYVCK

>Ct_wnt11

QIQICATRQTTDVCQYLFAQYRWNCGSREQAYVHALSAAALAQTISKACTQGATFKWGGC

GDDLRFGMIFSASFADSPFSKQAMMNLHNNNAGRKIISDSLVTDCKCHSGSCNIKTCWKA

LPDMRTVGTKIQERYFSENELIYYTKSPDYCLPDGGLGSMGTRGRECEKTNDGIGCQSMC

CGRGFTSQVVEVKHRCECKYFYCCYVECKTCTKKVEINRCR

>Pd_wnt11

QVRMCATREAVLTCQSLFADRRWNCGSREQAFVYAISSAAITHAVSRACSIGATFKWGGC

GDDLRFGLAYADLFAAPGGSKRHLVNSHNNAAGRKLISDSLQTACKCHSGSCSIKTCWKA

LPDLKELGMMLQKKYFQAEELIYYTKSPDYCLPDTTLGSLGTRGRECNKDSTSGGCRSMC

CGRGYTSHVMEIKQRCDCKYYWCCYVKCKTCTTKVEINRCR

>Lg_wnt11

QRRICASLLSVETCQNQFSDRRWNCGTREQAYVYGIASAALTHSVARACSIGVTFKWGGC

GDDLHFGMALGRAFTDASLSKKAMMNRHNFAAGRKIVESSLTTACKCHSGSCSIKTCWKS

LPDFDSIGATLKNRYIRSDELIYYTKSPDYCSPDAKSGSIGTHNRLCDKTSRGGGCDVMC

CGRGYDSFKMEVMERCECKYYWCCYVKCKTCVKTLNLSKCR

>Tc_wnt10

QLELCGIRQAVKECHYQFFNYRWNCGFRETAFAYAISSAGIAISVAKSCSRGVLWKWAGC

SHNLHYGSKFSKMFFESKEDIHSQVSLHNSKIGRMTVFANMQIKCKCHSGSCELKTCWKQ

VPNFHYVGKSLKEKFGLKNNLLFYEKSPHFCDAAPPLDVWGTSGRLCSLNATDSSCSSLC

CGRGYNLVKQRRTVSCFCVFRWCCTVECRDCIEEKWISICK

>Dm_wnt10

QVELCGLDMAIRECQIQFQWHRWNCGYRESAFAFAISAAGVAHSVARACSQGRLWKWGGC

SHNMDFGVEYSKLFLDCREDIQSKINLHNNHAGRIAVSNNMEFRCKCHSGSCQLKTCWKS

APDFHIVGKVLKHQFKLETSLFYYQRSPNFCERDLGADIQGTVGRKCNRNTTTDGCTSLC

CGRGHSQVIQRRAERCHCKFQWCCNVECEECHVEEWISICN

>Sk_wnta

QRELCGAEYGHTECQHQFRNQRWNCRSAETAFVHAVMSAGVTYSVTRACGMGILWNWDGC

NDNIGYGMYFSRDFMDAIENGLSLMNIHNNEAGRQVIKHEMYTKCKCHSGSCTSKICWRT

MRKMRDIGDILMDKYLPVTELVYLDTSPDWCEPNKKYFSHGTHGRFCNKTSRNDSCALMC

CGRGYQIMERRVEESCNCRFHWCCVVTCESCIRDEELHICN

>Dm_wnt5

QKKQCGARAAIQECQFQFKNRRWNCAAPEMAFIHALAAATVTSFIARACRDGQLWKWGGC

GDNLEFAYKFATDFIDSREKARSLMNLHNNEAGRRAVIKKARITCKCHSGSCSLITCWQQ

LSSIREIGDYLREKYPTAHDLIYLDESPDWCRNSYALHWPGTHGRVCHKNSSGESCAILC

CGRGYNTKNIIVNERCNCKFHWCCQVKCEVCTKVLEEHTCK

>Tc_wnt11

QAKLCAAVLAADTCQTVFKDRRWNCATREQAYVYAISSAALTYTMARACASGTLFQWGGC

GDNIHWGVYFAKRFIDNVEEEIAAVNLHNNRVGRRIIRESIQTQCKCHSGSCNVKTCWKG

LPPMFEIGRKLMKQYRISDHLLYLSKSPDYCTKDVKLGSFGTVGRKCNVTTNENSCRQLC

CGRGYRTLVEEKLERCHCKYYNCCYVKCKICRTKTQIYECG

>Ct_wnt9

QKKMCSVRLSVVECQANFKFDRWNCGYKETAYLHALTSSSLVHTFSRACAQGRLWLWGGC

GDNIQYGMKFARRFLRWMRDLQATADSHNSDVGIRVVRNGINKTCKCHSGSCTVQTCWRQ

LANFHEVGSDLKSKYPKKGDLVFLEKSPNYCEPTA--FGHGTTGRVCDLNK---NCDILC

CGRGYNIHTRIVDKPCHCQVIWCCHVKCQRCSVREDIYTCK

>Lg_wnt9

QKRMCATRLAVIECQYQFKHERWNCGFSETSFLYAISSAGLVHAFARACSKGVLWLWGGC

GDNLRYGLKFTRKFLKRARDVRAKVNQHNSRVGIKVVKENVNTTCKCHSGSCTVKTCWLQ

LSPFSKIGRTLKNKYPKRGNLLYMDESPSFCRRSR--YTPGTTGRTCDKDR---DCETMC

CGRGYNVKHTTVVKACKCQVFWCCHVKCKQCLKNQEIYMCK

>Hs_wnt9a

QRRMCAVSMSALECQFQFRFERWNCGFKETAFLYAISSAGLTHALAKACSAGRMWQWGGC

GDNLKYSSKFVKEFLGRRSDLRARVDFHNNLVGVKVIKAGVETTCKCHSGSCTVRTCWRQ

LAPFHEVGKHLKHKYPRTPELVHLDDSPSFCLAGR--FSPGTAGRRCHREK---NCESIC

CGRGHNTQSRVVTRPCQCQVRWCCYVECRQCTQREEVYTCK

>Hs_wnt9b

QKQLCAAHLGLLECQFQFRHERWNCGFKETAFLYAVSSAALTHTLARACSAGRMWQWGVC

GDNLKYSTKFLSNFLGSKRDLRARADAHNTHVGIKAVKSGLRTTCKCHSGSCAVRTCWKQ

LSPFRETGQVLKLRYPRSGDLVYMEDSPSFCRPSK--YSPGTAGRVCSREA---SCSSLC

CGRGYDTQSRLVAFSCHCQVQWCCYVECQQCVQEELVYTCK

>Sk_wnt9

QRRFCAVRLSTAECQYQFFNERWNCGFKETSFLYAISSAGLAHSVARSCSRGILWKWGGC

GDNLKYSQKFVQNFLQLESDLRAKAEKHNSEVGVRLLRQGFNTTCKCHSASCTTRTCWQQ

LSPFREIGNQLKEKYPRPSDLVYVDNSPHFCKKSR--FSPGTDGRRCLVGP---NCNSIC

CGRGYNIKTKVVEKSCKCRVVWCCYVECDMCSESVEIHLCK

>Pd_wnt9

QKRLCAAILSTNECKYQFRGERWNCGYRETAFLYAMSAAGLVHTLSRACSTHQLWLWGGC

DDNIQFGLRFTKRFFQAKADLKANIDRHNSRVGLKVVKNGLHKTCKCHSGSCTTQTCWHT

LSEFEEIGKILKMKYPRKRDLLFLEDSINFCDSSD--FSPGTKGRECNSKR---KCEEIC

CGRGHNLKVRMVRKPCNCTFTWCCHATCNECMVKKEMYTCK

>Bf_wnt8

PKSSFGAQTAMEECKHQFSWDRWNCANREASFVHAISAAGVMYVLTRNCSKGAFWTWGGC

SDDIAFGERISKMYSDGVEDARAAMNLHNNDVGRKAVRQTMKRVCKCHSGSCTTKTCWLQ

LADFRAIGVFLKKKYGLKKDMVFLEDSPDYCRENLTVGSRGTLGRECLRGGGKKSCKRLC

CGYVPKRITTEVTSSCNCKFHWCCSVKCSQCTKTVTKYICV

>Hs_wnt8a

PK---GAQSGIEECKFQFAWERWNCATRETSFIHAISSAGVMYIITKNCSMGDFWIWGGC

SDNVEFGERISKLFVDSLEDARALMNLHNNRAGRLAVRATMKRTCKCHSGSCSIQTCWLQ

LAEFREMGDYLKAKYSAEAELIFLEESPDYCTCNSSLGIYGTEGRECLQNSHNRSCGRLC

CGLQVEERKTEVISSCNCKFQWCCTVKCDQCRHVVSKYYCA

>Hs_wnt8b

PK---GAQSGIEECKYQFAWDRWNCANRETAFVHAISSAGVMYTLTRNCSLGDFWLWGGC

SDNVGFGEAISKQFVDALEDARAAMNLHNNEAGRKAVKGTMKRTCKCHSGSCTTQTCWLQ

LPEFREVGAHLKEKYISTRELVHLEDSPDYCLENKTLGLLGTEGRECLRRGRARSCRRLC

CGLAVEERRAETVSSCNCKFHWCCAVRCEQCRRRVTKYFCS

>Sk_wnt8

PK---GAMHGMEECRHQFLWDRWNCANRETSFVHAISSAGVMYTLTRNCSLGDFWKWGGC

SDNVNFGERVSKMFVDALVDAWAVMNLHNNEAGRKAVRQTLKRTCKCHSGSCTTQTCWKQ

LSEFRVIGDFLKRKYLSKKDLVYLEASPDYCRVNVSAGSMGTVGRECVRGTKKQSCKRLC

CGLKVKKTKVIEKSSCNCKFHWCCSVKCDECQQEVTKLTCQ

>Pd_wnt8

PK---GVERGITQCQQQFKWDRWNCVTREVAFVHAITAAGVTYTLTRNCSAGHIWLWGGC

SDNVHFGERISRLFLDSRVDARAIVHLHNNDVGRISIRRNLKLVCKCHSGSCTTKTCWQQ

LAGFKEVGIYLRRKYVKKGDLVYLAKSGNYCSLNGSAATYATLGRQCSRPKKGRSCKTLC

CGLKVSKRMTTVQRKCDCQFHWCCEVKCKLCVEDLALLTCS

>Ct_wnt8

SK---GTQLGLRECQEQFKWERWNCVTKEISFGQAITCAGVAHTITKNCSSGEFWKWGGC

SDNLRFGERVSKLFFDDRVDAMATVNLHNNEVGRTALKKTMELICKCHSGSCTTKTCWQH

LSDFRSVGTFLKRCYIRKTDLVYLQTSPDYCRVN---GSYATLGRQCVRSSAAKSCHRLC

CGLKVTDKVVEVTSSCKCKFKWCCEVACQQCRRKVELSTCT

>Tc_wnt8a

SKTILGAQMAMDECRNVFKWDRWNCATKEKAYTNAIITAGIIYSITRDCSQGVIWTWGGC

SDDSSFGEELVLKLLEDNEDAQAFINRHNNRIGREIIREKMLKTCKCHSGSCSFQTCWMQ

MPTFPEIAKQLRERYDVLPNLLYLEKSPDFCLSNNSTGWPGTRGRTCSRTTSAKSCRNLC

CGFRVRKQEKKVTKRCNCKFIWCCEVECDVCVEYVNEFTCH

>Dm_wnt4

QNHQCARRLATTHCEEQFRYDRWNCLYKETAFVHALTAAAMTHSIARACAEGRMFQWGGC

NDNLKHGKRVTRSFLDLRGDEVSEILRHDSEVGIEAVSSQMMDKCKCHSGSCSMKTCWKK

MADFNATATLLRQKYSQYTTLYYLETSPSYCAV--------TKDRQCLH----DNCGTLC

CGRGYTTQVVKQVEKCRCRFNRCCQLICDYCQRLENKYFCK

>Tc_wnt9

------------------RYDQWNCIYRETAFMHSMAAAALTFSIARACSEGTLWQWGGC

SDNIKFAKKFTRRFLQLRKNYQNAIVKYNSEVGIRIVIENVQVVCKCHSGSCSLKVCYKK

IQAFDYVSKQLKGLYKMGQKLVFLENSPSFCPT--------TVDRRCNNT---ENCATLC

CGRGFYTTQVHEINKCMCRWREMFNVECKYCRENKTIFRCK

>Dm_wnt8

QYTQFGLKQALDSCQQSFQWQRWNCPNREDVYVAAISMAAIVHTLTKDCANGVI------

ALNVPCAHEPTKALEQY-EGSGSGAIGHNRRVVGALLQRSLEQECRCKQGECQEEECVAV

LKPFEAIAQDLLQMYIPLDSLVFMQDSPNYCERDATGLWKGTRGRQCSKDGSGLSCQQLC

CGYRVRSQHVRTERRCNCKLVWGFRLQCDVCVQLERQYSCY

=== RHOX ===

>Nematode|ceh-45|Gsc|PRD

RRHRTIFSEEQLNILETTFTHYPDATTREELAVQCSLKEERVEVWFKNRRAKER

>Zebrafish|chr05.1|Gsc|PRD

RRHRTIFTEEQLQALEDLFNQYPDIHTREQLALKTQLREERVEVWFKNRRAKWR

>Human|GSC2|Gsc|PRD

RRHRTIFSEEQLQALEALFNQYPDVSTRERLAGRIRLREERVEVWFKNRRAKWR

>Mouse|Gsc2|Gsc|PRD

RRHRTIFSEEQLQALEALFNQYPDVGTRERLAVRIRLREERVEVWFKNRRAKWR

>Chicken|GSC2|Gsc|PRD

RRHRTIFTEEQLQALETLFNQYPDVITREHLANRIHLKEERVEVWFKNRRAKWR

>Human|GSC|Gsc|PRD

RRHRTIFTDEQLEALENLFTKYPDVGTREQLARKVHLREEKVEVWFKNRRAKWR

>Mouse|Gsc|Gsc|PRD

RRHRTIFTDEQLEALENLFTKYPDVGTREQLARKVHLREEKVEVWFKNRRAKWR

>Chicken|GSC|Gsc|PRD

RRHRTIFTDEQLEALENLFTKYPDVGTREQLARKVHLREEKVEVWFKNRRAKWR

>Zebrafish|gsc|Gsc|PRD

RRHRTIFTDEQLEALENLFTKYPDVGTREQLARKVHLREEKVEVWFKNRRAKWR

>Frog|gsc|Gsc|PRD

RRHRTIFTDEQLEALENLFTKYPDVGTREQLARRVHLREEKVEVWFKNRRAKWR

>Amphioxus|Gsc|Gsc|PRD

RRHRTIFTEEQLELLEKTFTHYPDVLLREELAMKVELKEERVEVWFKNRRAKWR

>Fruitfly|Gsc|Gsc|PRD

RRHRTIFTEEQLEQLEATFTHYPDVVLREQLALKVDLKEERVEVWFKNRRAKWR

>Honeybee|Gsc|Gsc|PRD

RRHRTIFTEEQLEQLEATFTHYPDVILREQLALQVDLKEERIEVWFKNRRAKWR

>Beetle|Gsc|Gsc|PRD

RRHRTIFSEEQLEQLEATFTHYPDVVLREQLALKVDLKEERVEVWFKNRRAKWR

>Human|HESX1|Hesx|PRD

RRPRTAFTQNQIEVLENVFNCYPGIDIREDLAQKLNLEEDRIQIWFQNRRAKLK

>Mouse|Hesx1|Hesx|PRD

RRPRTAFTQNQVEVLENVFNCYPGIDIREDLAQKLNLEEDRIQIWFQNRRAKMK

>Chicken|HESX1|Hesx|PRD

RRPRTAFTRNQIEVLENVFNSYPGIDIREELARKLDLEEDRIQIWFQNRRAKLK

>Frog|hesx1|Hesx|PRD

RRPRTAFTRSQIEILENVFNSYPGIDIREELAGKLALDEDRIQIWFQNRRAKLK

>Zebrafish|hesx1|Hesx|PRD

RRPRTAFSSVQIKILESVFNSYPGIDIREELAKKLQLDEDRIQIWFQNRRAKLK

>Mouse|Rhox13|Rhox|PRD

RGPPFHFAQWQVEEMESLFTQYPDLLTRGELARTLNVPEVKVKVWFTNRRAKQR

>Mouse|Rhox7|HD1|Rhox|PRD

--------------METMFTQYPDVLTREVLARSMDGSEAKVQIRFNNRRAKQR

>Human|TPRX1|Tprx|PRD

RQERTVYTESQQKVLEFYFDQYPNYDQRLNLAEMLSLREQQLQVWFKNRRAKLA

>Human|TPRXL|Tprx|PRD

RQDRTIYNWKQQEVLENHFEQYPDYDTRQELAEMLNLREYQVQVWFKNRRAKRS

>Chicken|LOC419032|Nobox|PRD

KKTRTFYSAEQLEELEKVFDRYPDNEKRREIAAVIGVTPQRIMVWFQNRRAKWR

>Zebrafish|wu:fi69e09|Nobox|PRD

KKTRTFYSTDQLEELERVFDHYPDGDKRKEIAAAIGVTPQRIMVWFQNRRAKWR

>Human|NOBOX|Nobox|PRD

KKTRTLYRSDQLEELEKIFDHYPDSDKRREIAQTVGVTPQRIMVWFQNRRAKWR

>Mouse|Nobox|Nobox|PRD

KKTRTLYRSDQLEELERIFDHYPDSDKRHEISQMVGVTPQRIMVWFQNRRAKWR

>Frog|nobox-l|Nobox|PRD

KKSRTLYSMDQLQELERLFDHYPDSEKRREIAEIIGVTPQRIMVWFQNRRAKWR

>Human|RHOXF1|Rhox|PRD

RTRRTKFTLLQVEELESVFTQYPDVPTRRELAENLGVTEDKVRVWFKNKRARCR

>Mouse|Gm14543|Rhox|PRD

RPLRDRFTEPQLQELEQVFNHYLRAEEGKQLARGMGVTEAKLQRWFKKRRVQFR

>Mouse|Rhox7|HD2|Rhox|PRD

RPLRDGFTEPQLQELEQVFNHYLRAEEGKQLARGMGVTEAKLQRWFKKRRVQFR

>Mouse|Gm7590|Rhox|PRD

RPLRDRFTEPQLQELEQVFNHCLRAEEGKQLARGMGVTEAKLQRWFKKRRVQFR

>Mouse|Gm6310|Rhox|PRD

LCLRDGFTEPQLQELEQVFNHYLRAEEGKQLARGMGVTEAKLQRWFKKRRVQFR

>Mouse|Rhox3a|Rhox|PRD

RRLHHRFTQWQLDELERIFNYFLSLEARKQLARWMGVNEAIVKRWFQKRREQYR

>Mouse|Rhox4a|Rhox|PRD

RSLHYNFQWWQLQELERIFNHFIRAEERRHLARWIGVSEARVKRWFKKRREHFR

>Mouse|Rhox8|Rhox|PRD

PRNRYRFTKFQLQELERIFNHYPSAAARRELARWIGVTESRVENWFKSRRAKYR

>Mouse|Rhox6|Rhox|PRD

RYRRTRFTHSQLHDLERLFTRYPSLRARRDLARWMGVDECDVQNWFRMRRALFQ

>Mouse|Rhox9|Rhox|PRD

RTRRTRFTHSQLRDLERLFNRFPSLRVRRDLARWMGVDESDVQEWFKMRRALFR

>Mouse|Rhox2a|Rhox|PRD

HGWQQSFNVLQLQELESIFNHYISTKEANRLARSMGVSEATVQEWFLKRREKYR

>Human|RHOXF2|Rhox|PRD

QPNVHAFTPLQLQELERIFEQFPSEFLRRRLARSMNVTELAVQIWFENRRAKWR

>Human|RHOXF2B|Rhox|PRD

QPNVHAFTPLQLQELECIFEQFPSEFLRRRLARSMNVTELAVQIWFENRRAKWR

>Mouse|Gm14544|Rhox|PRD

CRKQYKFTPEQLLELDRIFTQCPDTLQRKEIAKLMNVEECTVKIWFCNQRAKLR

>Mouse|Rhox11|Rhox|PRD

PRKAYRFTPGQLWELQAVFNQYPDALKRKELAGLLNVDEQKIKDWFNNKRAKYR

>Mouse|Rhox10|Rhox|PRD

RSNSKKYTNAQMCELEKAFTQYPDAHQRKALAKLIDVDECKVKAWFKYKRAKYR

>Mouse|Rhox12|Rhox|PRD

PRIQLGFTPRQLNELEDFFTKYPDALTRKNLAKHLYLAESKVQRWFKKRRAHYR

>Mouse|Rhox1|Rhox|PRD

CGLSNRFSRWQLQQLELLFTQYISAQDRKRLAVCLCVCEAKVQNWFQRRRAEYR

>New|Of_rhox

RTRRGQLSLRQKSQLEDAFCPNPTESQQRNLGKKIGITVDSVQKWFSKQHARCI

>Human|HOPX|Hopx|PRD

AETASGPTEDQVEILEYNFDKHPDSTTLCLIAAEAGLSEEETQKWFKQRLAKWR

>Mouse|Hopx|Hopx|PRD

AQTASGPTEDQVEILEYNFNKHPDPTTLCLIAAEAGLTEEQTQKWFKQRLAEWR

>Chicken|HOPX|Hopx|PRD

TEKSVTPTEEQLEILEYNFNKHPDPTTLCLIAAETGLSEEQTLKWFKQRLAEWR

>Frog|hopx|Hopx|PRD

GSDSTGLTNQQIEVLEYNFSKQPHNTSIMLIAAETGLTEEETKKWFKERLAKWR

>Amphioxus|Hopx|Hopx|PRD

PGQMSRISDDQERILEYNFTKTPDGITLEIIAAESGLSVEETAKWFQHRYALWR

=== FGF ===

>Ofus_FGFR_OFUSG19037.1/540-821

LSLGRILGEGAFGIVRQGEAVGIGGK--TTTTTVAIKSLKHDATDHEVTDLIREMEVMKV

IGRHINIINLLGCCTQ---DGPLYVIVEFAPNGNLRDFLRSRRPPNSGYEK-PM------

------------------------------------------------------------

----------ISQWQEQ---------------------------------VSIDAKPLLH

KDLLSFAYQIARGMEYLGSKLCIHRDLAARNVLVTEDYVLKIADFGLTRNIQNIDYYKKT

TDGRLPVKWMAPEALFDKKYTSKSDVWSYGVLLWEIFTLGGNPYPSVPV-EDLFKLLREG

HRMEKPPYCSLEVFNIMLDCWAQQPGYRPTFSDLVENL

>sp|P11362|FGFR1_HUMAN/478-754

LVLGKPLGEGCFGQVVLAEAIGLDKDKPNRVTKVAVKMLKSDATEKDLSDLISEMEMMKM

IGKHKNIINLLGACTQ---DGPLYVIVEYASKGNLREYLQARRPPGLEYCY-NP------

------------------------------------------------------------

--------------------------------------------------SHNPEEQLSS

KDLVSCAYQVARGMEYLASKKCIHRDLAARNVLVTEDNVMKIADFGLARDIHHIDYYKKT

TNGRLPVKWMAPEALFDRIYTHQSDVWSFGVLLWEIFTLGGSPYPGVPV-EELFKLLKEG

HRMDKPSNCTNELYMMMRDCWHAVPSQRPTFKQLVEDL

>sp|P21802|FGFR2_HUMAN/481-757

LTLGKPLGEGCFGQVVMAEAVGIDKDKPKEAVTVAVKMLKDDATEKDLSDLVSEMEMMKM

IGKHKNIINLLGACTQ---DGPLYVIVEYASKGNLREYLRARRPPGMEYSY-DI------

------------------------------------------------------------

--------------------------------------------------NRVPEEQMTF

KDLVSCTYQLARGMEYLASQKCIHRDLAARNVLVTENNVMKIADFGLARDINNIDYYKKT

TNGRLPVKWMAPEALFDRVYTHQSDVWSFGVLMWEIFTLGGSPYPGIPV-EELFKLLKEG

HRMDKPANCTNELYMMMRDCWHAVPSQRPTFKQLVEDL

>sp|P22607|FGFR3_HUMAN/472-748

LTLGKPLGEGCFGQVVMAEAIGIDKDRAAKPVTVAVKMLKDDATDKDLSDLVSEMEMMKM

IGKHKNIINLLGACTQ---GGPLYVLVEYAAKGNLREFLRARRPPGLDYSF-DT------

------------------------------------------------------------

--------------------------------------------------CKPPEEQLTF

KDLVSCAYQVARGMEYLASQKCIHRDLAARNVLVTEDNVMKIADFGLARDVHNLDYYKKT

TNGRLPVKWMAPEALFDRVYTHQSDVWSFGVLLWEIFTLGGSPYPGIPV-EELFKLLKEG

HRMDKPANCTHDLYMIMRECWHAAPSQRPTFKQLVEDL

>sp|P22455|FGFR4_HUMAN/467-743

LVLGKPLGEGCFGQVVRAEAFGMDPARPDQASTVAVKMLKDNASDKDLADLVSEMEVMKL

IGRHKNIINLLGVCTQ---EGPLYVIVECAAKGNLREFLRARRPPGPDLSP-DG------

------------------------------------------------------------

--------------------------------------------------PRSSEGPLSF

PVLVSCAYQVARGMQYLESRKCIHRDLAARNVLVTEDNVMKIADFGLARGVHHIDYYKKT

SNGRLPVKWMAPEALFDRVYTHQSDVWSFGILLWEIFTLGGSPYPGIPV-EELFSLLREG

HRMDRPPHCPPELYGLMRECWHAAPSQRPTFKQLVEAL

>sp|Q26614|FGFR_STRPU/639-912

LTVGKTIGEGAFGKVVIGEAVGIVCQ--EKTSTVAVKMLKANAMDREFSDLISELAMMKM

IGKNPNIINLLGCCTQ---EGPPYVIVEFAHHGNLRDFLRSRRPPE-EYEK-SI------

------------------------------------------------------------

--------------------------------------------------LLTTSQTLTN

KDLMSMAYQVARGMDFLASKKCIHRDLAARNVLVTEDFEMKICDFGLARDIHYIDFYRKT

TDGRLPVKWMAPEALFDRMFTTQSDVWSFGILLWEIMTLGGTPYPSVPV-EQMFDYLRSG

KRLEKPQNTSLEIYHILCECWRTSPGQRPTFCELVEDL

>sp|Q86PM4|FGFR_HYDVU/474-743

LETDCLLGEGAFGRVFRATARDLPNH--TGVQTVAVKMLKEDCCEQDLKDFISEIEVMKS

IGKHINILNLLAVSSQ---QGKLYIVVEYCRHGNLRSFLKDNRPVMQA------------

------------------------------------------------------------

--------------------------------------------------NSVITKKITL

YDLTSFCLQVARGMNFLASKKCIHRDIAARNVLVGEGYLMKIADFGLARDIHEQDYYRKC

TDGRLPVKWMAIEALFDRVYTTQSDIWSFGILAWEIVTFGGSPYPGIAL-EKLFDLLKQG

YRMERPLNCTDDMYTLMLNCWKEIPSKRPTFSQLIEDL

>sp|Q07407|FGFR1_DROME/416-688

LVLGATLGEGAFGRVVMAEV---------NNAIVAVKMVKEGHTDDDIASLVREMEVMKI

IGRHINIINLLGCCSQ---NGPLYVIVEYAPHGNLKDFLYKNRPFGRDQDR-DSS-----

------------------------------------------------------------

--------------QPP---------------------------------PSPPAHVITE

KDLIKFAHQIARGMDYLASRRCIHRDLAARNVLVSDDYVLKIADFGLARDIQSTDYYRKN

TNGRLPIKWMAPESLQEKFYDSKSDVWSYGILLWEIMTYGQQPYPTIMSAEELYTYLMSG

QRMEKPAKCSMNIYILMRQCWHFNADDRPPFTEIVEYM

>sp|Q09147|FGFR2_DROME/712-996

LSLGSILGEGAFGRVVMAEAEGLPRSPQLAETIVAVKMVKEEHTDTDMASLVREMEVMKM

IGKHINIINLLGCCSQ---GGPLWVIVEYAPHGNLKDFLKQNRPGAPQRRS-DSD-----

------------------------------------------------------------

-----------GYLDDK---------------------------------PLISTQHLGE

KELTKFAFQIARGMEYLASRRCIHRDLAARNVLVSDGYVMKIADFGLARDIQDTEYYRKN

TNGRLPIKWMAPESLQEKKYDSQSDVWSYGVLLWEIMTYGDQPYPHILSAEELYSYLITG

QRMEKPAKCSLNIYVVMRQCWHFESCARPTFAELVESF

>sp|Q4H3K6|FGFR_CIOIN/377-656

ILLHERIDEGFFGQVFRADLIRCAGGR-KEKVDAAVKMLKSTRTEKDMLDLLTEMDQMKR

VGKHKNIVNLLGVCTQ---NGILWLVTEYAQKGNLRDYLRRNRPSELQYEL-ST-----P

------------------------------------------------------------

--------------DSP---------------------------------APPRDEPLTL

RALMSASHQVARGMEYLSQKKCIHRDLAARNVLVANDFVMKIADFGLARDIRSNDYYRKE

TRGHLPYKWMALEAMTDNMFTHATDVWSFGILLWEIFSLGGSPYPGVKT-HDLVRFLRNG

DRLEQPQFASSELYRLMRDCWEESPRRRPQFRQLVEDL

>sp|P26619|PGFRA_XENLA/595-950

LVLGRILGSGAFGKVVEGAAYGLSRS--QPVMKVAVKMLKPTARSSEKQALMSELKIMTH

LGAHLNIVNLLGACTK---SGPIYIITEYCFYGDLVNYLHKNRDNFQSRHP-EK-----P

KKDLDIFGLN-------------PADESTRSYVILSFENNGDYMDMKQADTMQYVPMLEM

KEPSKYSDIQRSLYDRPASYKKKPL--SEVKNIL----------------SDDGFEGLTV

LDLLSFTYQVARGMEFLASKNCVHRDLAARNVLLAHGKIVKICDFGLARDIMHDSNYVSK

GSTFLPVKWMAPESIFDNLYTTLSDVWSFGILLWEIFSLGGTPYPGMIVDSTFYNKIKSG

YRMAKPDHATHEVYDIMVKCWNSEPEKRPSFRHLSDIV

>sp|Q9PUF6|PGFRA_CHICK/593-950

LVLGRILGSGAFGKVVEGTAYGLSRS--QPVMKVAVKMLKPTARSSEKQALMSELKIMTH

LGPHLNIVNLLGACTK---SGPIYIITEYCFYGDLVNYLHKNRDNFLSRHP-EK-----P

KKDLDIFGMN-------------PADESTRSYVILSFENTGEYMDMKQADTTQYVPMLER

KEGSKYSDIQRSVYDRPASYKKKSLSESEVKNLL----------------SDDGSEGLSL

LDLLSFTYQVARGMEFLASKNCVHRDLAARNVLLAQGKIVKICDFGLARDIMHDSNYVSK

GSTFLPVKWMAPESIFDNLYTTLSDVWSYGILLWEIFSLGGILYPGMMVDSTFYNKIKSG

YRMAKPDHATNEVYEIMVKCWNNEPEKRPSFYHLSEIV

>sp|P16234|PGFRA_HUMAN/593-950

LVLGRVLGSGAFGKVVEGTAYGLSRS--QPVMKVAVKMLKPTARSSEKQALMSELKIMTH

LGPHLNIVNLLGACTK---SGPIYIITEYCFYGDLVNYLHKNRDSFLSHHP-EK-----P

KKELDIFGLN-------------PADESTRSYVILSFENNGDYMDMKQADTTQYVPMLER

KEVSKYSDIQRSLYDRPASYKKKSMLDSEVKNLL----------------SDDNSEGLTL

LDLLSFTYQVARGMEFLASKNCVHRDLAARNVLLAQGKIVKICDFGLARDIMHDSNYVSK

GSTFLPVKWMAPESIFDNLYTTLSDVWSYGILLWEIFSLGGTPYPGMMVDSTFYNKIKSG

YRMAKPDHATSEVYEIMVKCWNSEPEKRPSFYHLSEIV

>sp|P09619|PGFRB_HUMAN/600-958

LVLGRTLGSGAFGQVVEATAHGLSHS--QATMKVAVKMLKSTARSSEKQALMSELKIMSH

LGPHLNVVNLLGACTK---GGPIYIITEYCRYGDLVDYLHRNKHTFLQHHS-DKRRP--P

SAELYSNAL--------------PVGLPLPSHVSLTGESDGGYMDMSKDESVDYVPMLDM

KGDVKYADIESSNYMAPYDNYVPSAPERTCRAT-----------------LINESPVLSY

MDLVGFSYQVANGMEFLASKNCVHRDLAARNVLICEGKLVKICDFGLARDIMRDSNYISK

GSTFLPLKWMAPESIFNSLYTTLSDVWSFGILLWEIFTLGGTPYPELPMNEQFYNAIKRG

YRMAQPAHASDEIYEIMQKCWEEKFEIRPPFSQLVLLL

>sp|P17948|VGFR1_HUMAN/827-1154

LKLGKSLGRGAFGKVVQASAFGIKKS--PTCRTVAVKMLKEGATASEYKALMTELKILTH

IGHHLNVVNLLGACTK--QGGPLMVIVEYCKYGNLSNYLKSKRDLFFLNKD-AA-----L

HMEPKKEKME----------------------------PGLEQGKKPRLDSVTSSESFAS

SGFQED----------------KSLSDVEEEEDS----------------DGFYKEPITM

EDLISYSFQVARGMEFLSSRKCIHRDLAARNILLSENNVVKICDFGLARDIYKNPDYVRK

GDTRLPLKWMAPESIFDKIYSTKSDVWSYGVLLWEIFSLGGSPYPGVQMDEDFCSRLREG

MRMRAPEYSTPEIYQIMLDCWHRDPKERPRFAELVEKL

>sp|Q8AXB3|VGFR4_DANRE/809-1135

LRLGKTLGHGAFGKVVEASAFGIDKI--STCKTVAVKMLKVGATNNEWRALMSELKILIH

IGHHLNVVNLLGACTK--RGGPLMIIVEFCKYGNLSNYLRSKRGDFVVYKSQDGKA---V

RSSSGC---------------------------------DLSELIKRRLESVASTGSSAS

SGFIED----------------KSYCDSEEEEEEQ---------------EDLYKKVLTL

EDLICYSFQVAKGMEFLASRKCIHRDLAARNILLSENNVVKICDFGLARDVYKDPDYVRK

GDARLPLKWMAPEAIFDKIYTTQSDVWSFGVLMWEIFSLGASPYPGLHIDEEFCCRLKEG

TRMKAPEYSSSEIYQTMLDCWHGEPSQRPTFTELVERL

>sp|P35968|VGFR2_HUMAN/834-1160

LKLGKPLGRGAFGQVIEADAFGIDKT--ATCRTVAVKMLKEGATHSEHRALMSELKILIH

IGHHLNVVNLLGACTK--PGGPLMVIVEFCKFGNLSTYLRSKRNEFVPYKT-KG-----A

RFRQGKDYVG-----------------------------AIPVDLKRRLDSITSSQSSAS

SGFVEE----------------KSLSDVEEEEAP----------------EDLYKDFLTL

EHLICYSFQVAKGMEFLASRKCIHRDLAARNILLSEKNVVKICDFGLARDIYKDPDYVRK

GDARLPLKWMAPETIFDRVYTIQSDVWSFGVLLWEIFSLGASPYPGVKIDEEFCRRLKEG

TRMRAPDYTTPEMYQTMLDCWHGEPSQRPTFSELVEHL

>sp|Q5GIT4|VGFR2_DANRE/843-1171

LKLGEPLGRGAFGQVVEATAYGIEKA--TTCTTVAVKMLKEGATSSEYRALMSELKILIH

IGHHLNVVNLLGACTK--QGGPLMVIVEYCKHGNLSSYLKSKRGEYSPYKK-RT-----P

RMPNRREVQQDE----------DP------------REGDLGLGTSTRLDICTGTAVCTR

TGEQTY----------------KTLQDEQESSDW---------------------DHLTM

EDLISYSFQVAKGMEFLASRKCIHRDLAARNILLSENSVVKICDFGLARDVYKDPDYVRK

GDARLPLKWMAPETIFDRVYTTQSDVWSFGVLLWEIFSLGASPYPGVCIDESFCRRLKEG

TRMRAPDYATPEIYQTMLDCWLDRPLDRPTFTQLVEHL

>sp|P35916|VGFR3_HUMAN/845-1169

LHLGRVLGYGAFGKVVEASAFGIHKG--SSCDTVAVKMLKEGATASEHRALMSELKILIH

IGNHLNVVNLLGACTK--PQGPLMVIVEFCKYGNLSNFLRAKRDAFSPCAE-KS-----P

EQRGRFRAMV-----------------------------EL--ARLDRRRPGSSDRVLFA

RFSKTE----------------GGARRASPDQEA----------------EDLWLSPLTM

EDLVCYSFQVARGMEFLASRKCIHRDLAARNILLSESDVVKICDFGLARDIYKDPDYVRK

GSARLPLKWMAPESIFDKVYTTQSDVWSFGVLLWEIFSLGASPYPGVQINEEFCQRLRDG

TRMRAPELATPAIRRIMLNCWSGDPKARPAFSELVEIL

>sp|Q5MD89|VGFR3_DANRE/866-1177

LRLGKVLGHGAFGKVIEASIFGHDKK--SSANTVAVKMLKEGATASEHKALMSELKILIH

IGNHLNVVNLLGACTK--PNGPLMVIVEYCKYGNLSNFLRAKREFFLPYRD-RS-----P

KTQSQVRRMI-----------------------------EAGQASQSEHQPSTSS-----

--------------------------TNPPRVTV----------------DDLWKTPLTI

EDLICYSFQVARGMEFLASRKCIHRDLAARNILLSENNVVKICDFGLARDIYKDPDYVRK

GNARLPLKWMAPESIFDKVYTSQSDVWSFGVLLWEIFSLGASPYPGIQIDEDFCKRLKDG

TRMRAPDNASPEIYGIMLACWQGEPRERPTFPALVEIL

>Ofus_VEGFROFUSG03166.1/880-1201

LNFGMVLGAGAFGRVVKADAVGLNDY--ESSTPVAVKMVKDCTDYDQMKSLMSELKIMIH

IGSHLNVLNLLGAVTKDIASGELYIMMEYCPHGNLRNYLLKHRATFRDVTD-DEDVFEMP

KK-----------------------------------PGADQNLSPAQLKKLEAEG-GAT

GGPSDD----------------LHYVNVP---------------------ESHREPPVTT

KDLICFSYQIARGLEYLASRKFVHRDIAARNILVAEDRVMKIADFGLAKDVYKYEEYVKK

GAGALPIKWLALESLTHKVFSVKTDVWAYGILLYETFSLGGTPYPGVDLDATFIEKLKNG

YRMEKPQFASFQIYQLMKMCWEAEPEDRPTFSEITERV

>tr|Q95P10|Q95P10_DROME/867-1261 PDGF/VEGF

LKLGKQLGAGAFGVVLKGEAKGIRRE--EPTTTVAVKMVKATADNEVVRALVSELKIMVH

LGQHLNVVNLLGAVTKNIAKRELMVIVEYCRFGNIQNFLLRNRKCFINQINPDTDHID-P

SIMTQRMSDNYELHRDTNGGGLKYANVGFPIHSYINEPHNNNTQPPTHRRNSDNDPRSGT

RAGRTGSGTATYSYDRQMDTCATVMTTVPEDDQIMSNNSVQPAWRSNYKTDSTEAMTVTT

VDLISWAFQVARGMDYLSSKKVLHGDLAARNILLCEDNVVKICDFGLARSMYRGDNYKKS

ENGKLPIKWLALESLSDHVFSTYSDVWSYGIVLWEMFSLAKVPYPGIDPNQELFNKLNDG

YRMEKPKFANQELYEIMLECWRKNPESRPLFAELEKRF
