# Supplementary material for: ERK1/2 is an ancestral organising signal in spiral cleavage
Source: Research Square preprint supplement (doi:10.21203/rs.3.rs-793154/v1), 2021-08-23
Supplement: Supplementary file 9 [file e7d589f59f3bd3797881d58f.xlsx]

## Sheet: BFA_CB_down_KO
category	over_represented_pvalue	under_represented_pvalue	numDEInCat	numInCat
2539	KO:K09400	8.32816e-06	1	2	2
2446	KO:K09176	5.14696e-05	1	2	4
1697	KO:K06054	8.30341e-05	1	2	5
5606	KO:K20359	0.00283366	1	1	1
2427	KO:K09083	0.00284839	1	1	1
2503	KO:K09324	0.00285998	1	1	1
5245	KO:K18744	0.00287022	1	1	1
2728	KO:K10162	0.00287423	1	1	1
992	KO:K03249	0.00287467	1	1	1
2523	KO:K09366	0.00289779	1	1	1
6343	KO:K24148	0.0029009	1	1	1
2522	KO:K09365	0.00293458	1	1	1
5248	KO:K18753	0.00294474	1	1	1
2537	KO:K09397	0.00296944	1	1	1
4163	KO:K14693	0.00300192	1	1	1
6101	KO:K23345	0.0030181	1	1	1
974	KO:K03209	0.00303119	1	1	1
5579	KO:K20295	0.00304947	1	1	1
4251	KO:K14849	0.00308244	1	1	1
2733	KO:K10177	0.00309239	1	1	1
5576	KO:K20292	0.0031019	1	1	1
1221	KO:K04352	0.00316007	1	1	1
1350	KO:K04658	0.00571363	0.999992	1	2
2463	KO:K09219	0.00576202	0.999992	1	2
2494	KO:K09309	0.00577396	0.999992	1	2
2514	KO:K09349	0.00577486	0.999992	1	2
1753	KO:K06241	0.00578262	0.999992	1	2
4716	KO:K16748	0.00580011	0.999992	1	2
2415	KO:K09048	0.00596258	0.999991	1	2
5931	KO:K22555	0.00609233	0.999991	1	2
5904	KO:K22400	0.00852197	0.999976	1	3
128	KO:K00182	0.00870067	0.999975	1	3
2552	KO:K09442	0.00881421	0.999974	1	3
1575	KO:K05456	0.00912212	0.999972	1	3
2864	KO:K10457	0.00912419	0.999972	1	3
1864	KO:K06820	0.0106759	0.999962	1	3
2529	KO:K09374	0.0116784	0.999949	1	4
572	KO:K01556	0.011687	0.999949	1	4
4483	KO:K15502	0.0117077	0.999949	1	4
5514	KO:K20126	0.0148418	0.999912	1	5
4973	KO:K17622	0.0151121	0.999909	1	5
2542	KO:K09403	0.0175184	0.999873	1	6
5595	KO:K20315	0.0184706	0.999864	1	5
3580	KO:K12647	0.0189058	0.999852	1	6
1491	KO:K05039	0.0208148	0.999815	1	7
928	KO:K03068	0.022204	0.999789	1	7
1612	KO:K05658	0.0227009	0.99978	1	7
716	KO:K02183	0.033865	0.999473	1	12
1694	KO:K06051	0.0399962	0.999264	1	12

## Sheet: BFA_CB_up_KO
category	over_represented_pvalue	under_represented_pvalue	numDEInCat	numInCat
2412	KO:K09027	0.000628087	1	1	1
2770	KO:K10291	0.000763549	1	1	1
2072	KO:K07937	0.00125835	1	1	2
1991	KO:K07542	0.00236232	0.999998	1	3
1677	KO:K05901	0.00251697	0.999998	1	4
5216	KO:K18630	0.00566368	0.999987	1	7
1455	KO:K04967	0.0060916	0.999985	1	7
2150	KO:K08155	0.00721884	0.999978	1	9
1872	KO:K06839	0.0076364	0.999975	1	9

## Sheet: BFA_L_down_KO
category	over_represented_pvalue	under_represented_pvalue	numDEInCat	numInCat
5345	KO:K19511	3.06668e-05	0.999999	4	18
3112	KO:K11141	0.000317757	0.999999	2	3
167	KO:K00326	0.00031777	0.999999	2	3
5904	KO:K22400	0.000317889	0.999999	2	3
2649	KO:K09640	0.00104475	0.999989	2	5
2280	KO:K08635	0.00365973	0.999912	2	9
1		0.00842455	0.993844	206	17804
1793	KO:K06560	0.00934335	0.999077	3	42
6080	KO:K23311	0.0103427	1	1	1
4043	KO:K14359	0.0103427	1	1	1
4829	KO:K17301	0.0103427	1	1	1
3861	KO:K13575	0.0103427	1	1	1
5349	KO:K19521	0.0103427	1	1	1
533	KO:K01415	0.0103427	1	1	1
3953	KO:K14006	0.0103427	1	1	1
23	KEGG:eco:b3878`KO:K15922	0.0103428	1	1	1
5579	KO:K20295	0.0103428	1	1	1
816	KO:K02842	0.010343	1	1	1
4163	KO:K14693	0.0103431	1	1	1
328	KO:K00854	0.0103432	1	1	1
633	KO:K01805	0.0103435	1	1	1
4679	KO:K16621	0.0103437	1	1	1
5266	KO:K19007	0.010344	1	1	1
1535	KO:K05206	0.010344	1	1	1
2501	KO:K09321	0.0103442	1	1	1
3951	KO:K14004	0.0103442	1	1	1
4817	KO:K17268	0.0103444	1	1	1
2512	KO:K09341	0.0103444	1	1	1
101	KO:K00034	0.0103446	1	1	1
773	KO:K02432	0.0103447	1	1	1
2412	KO:K09027	0.0103448	1	1	1
2245	KO:K08517	0.0103449	1	1	1
2040	KO:K07880	0.0103449	1	1	1
2078	KO:K07952	0.010345	1	1	1
3637	KO:K12848	0.010345	1	1	1
5447	KO:K19932	0.010345	1	1	1
5606	KO:K20359	0.010345	1	1	1
81	KEGG:xla:779066`KO:K07939	0.0103451	1	1	1
5639	KO:K20472	0.0103451	1	1	1
5973	KO:K22764	0.0103454	1	1	1
6178	KO:K23617	0.0146301	0.999203	2	18
4092	KO:K14464	0.0196768	0.99873	2	21
2371	KO:K08843	0.0205762	0.999893	1	2
5522	KO:K20163	0.0205781	0.999893	1	2
1543	KO:K05236	0.0205787	0.999893	1	2
4191	KO:K14768	0.0205791	0.999893	1	2
2174	KO:K08229	0.0205793	0.999893	1	2
333	KO:K00863	0.0205794	0.999893	1	2
2415	KO:K09048	0.0205798	0.999893	1	2
6102	KO:K23353	0.0205799	0.999893	1	2
1354	KO:K04662	0.0205805	0.999893	1	2
4667	KO:K16599	0.0205807	0.999893	1	2
485	KO:K01314	0.020581	0.999893	1	2
176	KO:K00408	0.0205814	0.999893	1	2
4046	KO:K14380	0.0205814	0.999893	1	2
2539	KO:K09400	0.0205815	0.999893	1	2
213	KO:K00551	0.0205827	0.999893	1	2
277	KO:K00731	0.0253431	0.998111	2	24
2803	KO:K10350	0.0307093	0.999682	1	3
1690	KO:K06027	0.0307094	0.999682	1	3
4039	KO:K14354	0.0307095	0.999682	1	3
454	KO:K01229	0.0307107	0.999682	1	3
3388	KO:K11968	0.0307112	0.999682	1	3
5179	KO:K18443	0.0307125	0.999682	1	3
2238	KO:K08504	0.0307177	0.999682	1	3
3477	KO:K12323	0.0315785	0.997332	2	27
4150	KO:K14643	0.0407361	0.999369	1	4
2640	KO:K09610	0.040738	0.999369	1	4
4144	KO:K14621	0.0407387	0.999369	1	4
487	KO:K01316	0.0407394	0.999369	1	4
282	KO:K00738	0.0407402	0.999369	1	4
1085	KO:K03766	0.0407405	0.999369	1	4
509	KO:K01365	0.0407409	0.999369	1	4
1992	KO:K07553	0.0407417	0.999369	1	4

## Sheet: BFA_L_up_KO
category	over_represented_pvalue	under_represented_pvalue	numDEInCat	numInCat
2072	KO:K07937	1.29463e-06	1	2	2
2772	KO:K10294	0.00123768	1	1	1
2770	KO:K10291	0.00138554	1	1	1
4726	KO:K16761	0.00138777	1	1	1
4920	KO:K17535	0.00162198	1	1	1
1562	KO:K05310	0.00324683	0.999997	1	2
6135	KO:K23490	0.00522162	0.999989	1	5
2941	KO:K10630	0.00591461	0.999987	1	4
1965	KO:K07424	0.00837683	0.999971	1	7
6149	KO:K23533	0.0105715	0.999953	1	7
3130	KO:K11182	0.0107174	0.999952	1	7
1955	KO:K07408	0.0155142	0.999893	1	11
1		0.0243378	0.989016	30	17804

## Sheet: U0126_CB_down_KO
category	over_represented_pvalue	under_represented_pvalue	numDEInCat	numInCat
2539	KO:K09400	1.68421e-05	1	2	2
4845	KO:K17353	8.95628e-05	1	2	4
2529	KO:K09374	0.000115143	1	2	4
2542	KO:K09403	0.000296087	0.999998	2	6
3784	KO:K13207	0.000640136	0.999994	2	9
716	KO:K02183	0.000859449	0.99999	2	12
2427	KO:K09083	0.00354035	1	1	1
5333	KO:K19473	0.00375477	1	1	1
5245	KO:K18744	0.00378958	1	1	1
2728	KO:K10162	0.00383393	1	1	1
2523	KO:K09366	0.00408478	1	1	1
2717	KO:K10137	0.00432816	1	1	1
5041	KO:K17894	0.00461633	1	1	1
5042	KO:K17895	0.00462318	1	1	1
6032	KO:K23041	0.00470547	1	1	1
2537	KO:K09397	0.00471492	1	1	1
5777	KO:K21598	0.00492357	1	1	1
974	KO:K03209	0.00504875	1	1	1
2733	KO:K10177	0.00520213	1	1	1
4043	KO:K14359	0.00524711	1	1	1
6342	KO:K24146	0.00524713	1	1	1
1350	KO:K04658	0.00735237	0.999987	1	2
6303	KO:K24038	0.00744945	1	1	1
1753	KO:K06241	0.00802518	0.999984	1	2
3804	KO:K13254	0.0100214	0.999975	1	2
2464	KO:K09220	0.0100992	0.999975	1	2
3542	KO:K12495	0.0104738	0.999973	1	2
3944	KO:K13986	0.0105784	0.999972	1	2
5904	KO:K22400	0.0105901	0.999963	1	3
407	KO:K01071	0.0110677	0.999959	1	3
128	KO:K00182	0.0125234	0.999948	1	3
4037	KO:K14347	0.0125623	0.999947	1	3
4267	KO:K14946	0.0127315	0.999946	1	3
690	KO:K02085	0.0131453	1	1	1
1873	KO:K06841	0.0134201	0.99994	1	3
2195	KO:K08342	0.0137589	0.999937	1	3
4323	KO:K15111	0.0149955	0.999916	1	4
2446	KO:K09176	0.0181392	0.999877	1	4
1319	KO:K04579	0.0188326	0.999867	1	4
5758	KO:K21434	0.0194525	0.999849	1	5
412	KO:K01080	0.023757	0.999764	1	6
1759	KO:K06258	0.0243658	0.999762	1	5
4681	KO:K16629	0.0243824	0.999762	1	5
4973	KO:K17622	0.0251443	0.999746	1	5
3294	KO:K11660	0.0256764	0.999735	1	5
2096	KO:K08011	0.0258512	0.999732	1	5
2543	KO:K09405	0.0282064	0.999658	1	7
1466	KO:K04984	0.0306506	0.999607	1	6
1491	KO:K05039	0.033165	0.999526	1	7
2820	KO:K10382	0.0367055	0.999457	1	5

## Sheet: U0126_CB_up_KO
category	over_represented_pvalue	under_represented_pvalue	numDEInCat	numInCat
6238	KO:K23854	0.0022985	0.999998	1	4
1966	KO:K07427	0.00267474	0.999997	1	4
3227	KO:K11458	0.00312019	0.999997	1	4
6220	KO:K23790	0.00381676	0.999994	1	7
5216	KO:K18630	0.00479348	0.999991	1	7
3784	KO:K13207	0.00567937	0.999986	1	9
5457	KO:K19949	0.00927985	0.999965	1	7
1850	KO:K06756	0.0108438	0.999949	1	10
3547	KO:K12567	0.0112238	0.999944	1	15
3409	KO:K11997	0.0428833	0.999123	1	63

## Sheet: U0126_L_down_KO
category	over_represented_pvalue	under_represented_pvalue	numDEInCat	numInCat
1		4.83775e-05	0.999968	304	17804
5345	KO:K19511	0.000120806	0.999995	4	18
732	KO:K02222	0.000216578	1	2	2
176	KO:K00408	0.000216579	1	2	2
5904	KO:K22400	0.000643364	0.999997	2	3
3414	KO:K12046	0.00210293	0.999969	2	5
2649	KO:K09640	0.00210309	0.999969	2	5
4092	KO:K14464	0.00346849	0.999772	3	21
2280	KO:K08635	0.00728065	0.99975	2	9
440	KO:K01183	0.0114799	0.998794	3	32
2091	KO:K07997	0.0147318	1	1	1
3679	KO:K12959	0.0147318	1	1	1
2422	KO:K09069	0.0147318	1	1	1
2423	KO:K09070	0.0147318	1	1	1
5447	KO:K19932	0.0147318	1	1	1
2427	KO:K09083	0.0147319	1	1	1
773	KO:K02432	0.0147319	1	1	1
2507	KO:K09330	0.014732	1	1	1
2512	KO:K09341	0.014732	1	1	1
2520	KO:K09362	0.014732	1	1	1
5860	KO:K22120	0.014732	1	1	1
4506	KO:K15615	0.014732	1	1	1
2523	KO:K09366	0.014732	1	1	1
182	KO:K00445	0.014732	1	1	1
573	KO:K01558	0.014732	1	1	1
2491	KO:K09300	0.0147321	1	1	1
2689	KO:K09995	0.0147321	1	1	1
1535	KO:K05206	0.0147321	1	1	1
2555	KO:K09451	0.0147321	1	1	1
531	KO:K01413	0.0147321	1	1	1
4679	KO:K16621	0.0147322	1	1	1
6130	KO:K23461	0.0147322	1	1	1
5042	KO:K17895	0.0147322	1	1	1
2538	KO:K09399	0.0147322	1	1	1
2735	KO:K10185	0.0147322	1	1	1
6032	KO:K23041	0.0147323	1	1	1
2549	KO:K09435	0.0147323	1	1	1
5890	KO:K22329	0.0147324	1	1	1
2087	KO:K07970	0.0147324	1	1	1
816	KO:K02842	0.0147324	1	1	1
974	KO:K03209	0.0147324	1	1	1
506	KO:K01360	0.0147324	1	1	1
533	KO:K01415	0.0147326	1	1	1
2734	KO:K10179	0.0147327	1	1	1
5349	KO:K19521	0.0147327	1	1	1
4043	KO:K14359	0.0147327	1	1	1
1776	KO:K06484	0.0147327	1	1	1
5949	KO:K22655	0.0147328	1	1	1
1538	KO:K05210	0.0147328	1	1	1
2145	KO:K08135	0.0147328	1	1	1
2489	KO:K09291	0.0147328	1	1	1
2201	KO:K08375	0.0175303	0.998975	2	14
5844	KO:K22037	0.020032	0.998733	2	15
1751	KO:K06238	0.0249002	0.994963	4	75
2127	KO:K08076	0.0283562	0.997801	2	18
2530	KO:K09377	0.0292469	0.999783	1	2
1926	KO:K07232	0.0292472	0.999783	1	2
1769	KO:K06278	0.0292472	0.999783	1	2
2463	KO:K09219	0.0292474	0.999783	1	2
2494	KO:K09309	0.0292474	0.999783	1	2
2539	KO:K09400	0.0292475	0.999783	1	2
4046	KO:K14380	0.0292475	0.999783	1	2
110	KO:K00088	0.0292475	0.999783	1	2
6241	KO:K23858	0.0292477	0.999783	1	2
1354	KO:K04662	0.0292478	0.999783	1	2
2456	KO:K09203	0.0292479	0.999783	1	2
6102	KO:K23353	0.029248	0.999783	1	2
1598	KO:K05614	0.029248	0.999783	1	2
1857	KO:K06783	0.0292481	0.999783	1	2
5432	KO:K19882	0.0292482	0.999783	1	2
1700	KO:K06059	0.0292482	0.999783	1	2
2174	KO:K08229	0.0292482	0.999783	1	2
1513	KO:K05122	0.0292484	0.999783	1	2
5522	KO:K20163	0.0292485	0.999783	1	2
3542	KO:K12495	0.0292489	0.999783	1	2
1802	KO:K06584	0.0292489	0.999783	1	2
3287	KO:K11649	0.0292489	0.999783	1	2
5176	KO:K18439	0.029249	0.999783	1	2
2027	KO:K07841	0.0435491	0.999357	1	3
1436	KO:K04924	0.0435494	0.999357	1	3
942	KO:K03122	0.0435494	0.999357	1	3
519	KO:K01379	0.0435495	0.999357	1	3
569	KO:K01540	0.0435496	0.999357	1	3
1906	KO:K07127	0.0435496	0.999357	1	3
3932	KO:K13956	0.0435497	0.999357	1	3
1531	KO:K05199	0.0435498	0.999357	1	3
2731	KO:K10174	0.0435498	0.999357	1	3
316	KO:K00820	0.0435499	0.999357	1	3
4806	KO:K17233	0.0435501	0.999357	1	3
1873	KO:K06841	0.0435505	0.999357	1	3
2090	KO:K07996	0.0435506	0.999357	1	3
1949	KO:K07377	0.0435509	0.999357	1	3
1333	KO:K04604	0.0435509	0.999357	1	3
167	KO:K00326	0.0435509	0.999357	1	3
4537	KO:K15728	0.0435516	0.999357	1	3
277	KO:K00731	0.0482877	0.994891	2	24

## Sheet: U0126_L_up_KO
category	over_represented_pvalue	under_represented_pvalue	numDEInCat	numInCat
5730	KO:K21125	0.000501038	1	1	1
2376	KO:K08855	0.00102115	1	1	2
3561	KO:K12597	0.00151546	0.999999	1	3
5891	KO:K22369	0.00199988	0.999999	1	4
2536	KO:K09395	0.00200172	0.999999	1	4
2941	KO:K10630	0.00200881	0.999999	1	4
2850	KO:K10422	0.00253622	0.999998	1	5
307	KO:K00799	0.0143556	0.999906	1	29
