# Supplementary material for: ERK1/2 is an ancestral organising signal in spiral cleavage
Source: Research Square preprint supplement (doi:10.21203/rs.3.rs-793154/v1), 2021-08-23
Supplement: Supplementary file 10 [file fc82325b6f66906d675633f9.xlsx]

## Sheet: BFA-U0126_time_windows
	Wild type		Compressed		Radial
	n	%	n	%	n	%	Total
U0126 - 0 to 2c	30	88.24	0	0	4	11.76	34
U0126 - 0 to 4c	0	0	19	27.14	51	72.86	70
U0126 - 0 to 8c	1	1.45	0	0	68	98.55	69
U0126 - 0 to 3hpf	0	0	0	0	84	100	84
U0126 - 0 to 4hpf	0	0	0	0	79	100	79
U0126 - 0 to 5hpf	0	0	0	0	50	100	50
U0126- 3 to 5hpf	0	0	0	0	24	100	24
U0126 - 4 to 6hpf	0	0	0	0	20	100	20
U0126 - 5 to 7hpf	5	23.81	0	0	16	76.19	21
BFA - 0 to 2c	29	100	0	0	0	0	29
BFA - 0 to 4c	60	100	0	0	0	0	60
BFA - 0 to 8c	65	100	0	0	0	0	65
BFA - 0 to 3hpf	39	43.82	50	56.18	0	0	89
BFA - 0 to 4hpf	30	41.1	12	16.44	31	42.47	73
BFA - 0 to 5hpf	0	0	0	0	24	100	24
BFA - 3 to 5hpf	0	0	0	0	21	100	21
BFA - 4 to 6hpf	0	0	0	0	10	100	10
BFA - 5 to 7hpf	0	-	0	-	0	-	15

## Sheet: SU5402_time_windows
Replicate	Drug	Time window	Id	Total_n	WT	radialised	flat	Data
1	0.3DMSO	0-7hpf	DMSO_0-7hpf	13	13	0	0	in_situ
1	SU5402	3-5hpf	SU5402_3-5hpf	7	1	0	6	in_situ
1	SU5402	4-6hpf	SU5402_4-6hpf	17	3	14	0	in_situ
1	SU5402	3-7hpf	SU5402_3-7hpf	29	0	29	0	in_situ
1	0.3DMSO	3hpf-5hpf	DMSO_3hpf_4.5hpf_1	26	26	0	0	immuno
1	SU5402	3hpf-5hpf	SU5402_3hpf-4.5hpf_1	24	0	0	24	immuno
1	0.3DMSO	3hpf-7hpf	DMSO_3hpf-7hpf_1	87	87	0	0	immuno
1	SU5402	3hpf-7hpf	SU5402_3hpf-7hpf_1	26	0	26	0	immuno
1	0.3DMSO	0-24hpf	DMSO_0-24hpf_1	49	49	0	0	immuno
1	SU5402	0-24hpf	SU5402_0-24hpf_1	23	0	0	23	immuno
1	0.3DMSO	4hpf-6hpf	DMSO_4hpf-6hpf_1	42	42	0	0	immuno
1	SU5402	4hpf-6hpf	SU5402_4hpf-6hpf_1	29	0	29	0	immuno
